# Supplementary material for: Prices for veterinary care of dogs, cats, and horses in Sweden and Norway: comparisons between corporate chain, government-run, and independent clinics
Source: Front Vet Sci. 2025 Apr 17;12:1544996. doi: 10.3389/fvets.2025.1544996 (PMC12045027; doi:10.3389/fvets.2025.1544996)
Supplement: Supplementary file 3 [file Table_1.xlsx]

## Sheet: Explain
		Supplementary Table 1.
		Contains 9 sheets (this is 'Explain')
		Each sheet contains one or several tables.
		The first one mentioned in the text is on sheet ST1 etc.

## Sheet: ST1
							accessed 2024-07-13
Number	Species	Procedure		Procedure	Main data source at VP	Description	URL						Description in Swedish
1	Dog	Blood sample (C-reactive protein)	1	Blood sample (CRP)	reciept	Bloodsampling, analysis of C-reactive protein	https://vetpris.se/behandlingar/hund/unders%C3%B6kningar/blodprov-crp						I Vetpris "fiktiva fall" ingår blodprovstagning och CRP analys.
2		Caesarean section	2	Caesarean section	receipt	Surgical removal of 5 puppies during anaesthesia; 30 kg bodyweight	https://vetpris.se/behandlingar/hund/vanliga-akuta-operationer/kejsarsnitt						Om din hund har problem att valpa kan det i bland behövas ett kejsarsnitt. Orsakerna till snitt kan vara allt ifrån uteblivet värkarbete till felläge på valp. Kejsarsnitt är alltid en akut åtgärd. En tik får genomgå 2 kejsarsnitt i Sverige. Olika försäkringsbolag har olika regler för antal snitt som ersätts, läs noga på vad som gäller för just din ras. I priset utgår vi ifrån en tik på 30kg som h…	I priset utgår vi ifrån en tik på 30kg som har 5 valpar. Akutavgift ingår i priset men snittet sker på dagtid. Tänk på att ytterligare avgifter kan tillkomma i det fall man söker veterinärvård på natten. För mer information om Kejsarsnitt på natten - sök diagnos Kejsarsnitt-Jour.
3		Claw injury	3	Claw injury	receipt	Consultation fee, veterinary fee, regular-hours acute fee, removal of claw during sedation or anaesthesia, including consumables and bandage	https://vetpris.se/behandlingar/hund/operationer/klokapselbrott						Vid ett klokapselbrott avlägsnas klon och hunden får ett bandage som skyddar tassen.I Vetpris "unika fall" ingår akutavgift vardag 8-17, sedering/narkos, operation, förbrukningsmaterial, hund 30kg.	I Vetpris "unika fall" ingår akutavgift vardag 8-17, sedering/narkos, operation, förbrukningsmaterial, hund 30kg
4		Dental assessment / scaling	4	Dental assess / scaling	web	Assessment and scaling of teeth during anaesthesia or sedation	https://vetpris.se/behandlingar/hund/tandreng%C3%B6ring/tandsanering						Tandsanering/munsanering är rengöring av tänder/munhåla. Tandsten avlägsnas, tänderna poleras, man räknar alla tänder och tittar efter skador på tänder och munhåla. Om något onormalt uppdagas, brukar veterinären (efter överenskommelse med djurägare) kunna åtgärda nyupptäckta problem när hunden ändå är sövd för tandsaneringen. Röntgen kan också komma att bli nödvändig men ingår inte i Vetpris "fik…	I Vetpris "fiktiva fall" ingår avlägsnande av tandsten och polering. I det fall kliniken valt att specificera behandling efter vikt, utgår vi ifrån en hund på 30 kg.
5		Deworming with certificate	5	Deworming cert	web	Veterinarian administrates deworming and signs deworming certificate	https://vetpris.se/behandlingar/hund/intyg/intyg-avmaskning						Veterinären ger hunden avmaskning och skriver ett intyg i hundens pass. Normalt får man resa efter 1 dygn men inte senare än 5 dygn från avmaskningen.	Avmaskningsmedel bör innehålla prazikvantel ex milbemax och droncit
6		EU passport	6	EU passport	web	Issuing passport for travel in EU	https://vetpris.se/behandlingar/hund/intyg/eu-pass						I priset ingår Passet. Behövs avmaskning eller vaccination tillkommer det.
7		Euthanasia dog	7	Euthanasia	web	Consultation fee or travel fee < 30 km, veterinary fee and the fluid for extinction of life, across weight ranges	https://vetpris.se/behandlingar/hund/%C3%B6vrigt/avlivning-15-kg						I vetpris jämförelse ska veterinärarvode, poliklinikavgift alt ambulerande upp till 3 mil, avlivningsvätska ingå.
8		GDY bitch	8	GDY bitch	web	Removal of ovaries and uterus (the latter is an option) during anaesthesia, during regular-hours, across weight ranges	https://vetpris.se/behandlingar/hund/kastrering/kastrering-tik-upp-till-15-kg						Kastrering utförs antingen via tillhålskirurgi men vanligast är det ett snitt i buken från naveln och bakåt. Tiken är sövd när äggstockar och livmoder avlägsnas (ovariehysteriektomi) alt bara äggstockar (ovariektomi). Kastrering gör att tiken slutar löpa och inte blir skendräktig. Det finns både för- och nackdelar med ingreppet. Viktigt är att tänka igenom beslut i huruvida man ska kastrera sin t…	I Vetpris "fiktiva fall" utgår vi ifrån en frisk hund och att ingreppet sker en vardag. Totalkostnad för tik, kastrering konventionell metod, hund 15kg
9		GDY male dog	9	GDY male dog	web	Removal of testes during anaesthesia during regular-hours, across weight ranges	https://vetpris.se/behandlingar/hund/kastrering/kastrering-hanhund-15-kg						Vid kastration av hanhundar sövs hunden och testiklarna avlägsnas och hundens fortplantningsförmåga försvinner permanent. Det finns för- och nackdelar med kastrering. Viktigt är att man noga tänker igenom beslutet.	I det fiktiva fallet utgår vi från att ingreppet sker en vardag 8-17. Priset är en totalkostnad för kastrering av hanhund 15 kg där båda testiklarna är belägna i pungen.
10		Ophthalmic examination with certificate	10	Ophthal exam cert	web	Eye examination using funduscopy, certification	https://vetpris.se/behandlingar/hund/intyg/%C3%B6gonlysning						Djuret kommer få ögondroppar som vidgar pupillen. Vissa raser inom SKK har krav på ögonlysning, för registrering av avkomma. Många raser har DNA -test för vissa ögonsjukdomar. Ta noga reda på vad som gäller för just din ras eller blandras. Ögonlysningsintyg får endast utfärdas av veterinär med särskild kompetens.
11		Otitis	11	Otitis	receipt	Consulation fee, veterinary fee, microscopic exam of smear sample from ear	https://vetpris.se/behandlingar/hund/%C3%B6gon-och-%C3%B6ron/%C3%B6roninflammation						När det luktar illa i örat, kladdig brun gegga och eller inflammerad öronlapp/örongång, då det dags att boka tid till veterinären. Vid veterinärbesöket undersöker veterinären örat, luktar i örat och tar en tops för att kontrollera orsaken till problemet. Behövs receptbelagd medicin, skrivs det ut och djurägaren behandlar hunden hemma.	I Vetpris "fiktiva fall" ingår veterinärarvode, poliklinikavgift och mikroskopisk undersökning
12		Pyometra	12	Pyometra	receipt	Consultation fee, veterinary fee, acute fees, X-ray and blood tests preopative to surgery. Removal of ovaries and uterus during anaesthesia, including consumables and stationary care as usual for the clinic, 30 kg bodyweight	https://vetpris.se/behandlingar/hund/vanliga-akuta-operationer/livmoderinflammation						Livmoderinflammation kan uppkomma när som helst, men det är inte fel att hålla lite extra koll 2 månader efter löp. Den inkapslade och varfyllda livmoderinflammationen är ofta inte möjligt att behandla på annat sätt än operation, där livmodern avlägsnas. Operationen är akut och om ingen åtgärd vidtas, riskerar hunden att avlida. Vanliga symptom är flytningar som luktar illa, det kan även vara blo…	I Vetpris "fiktiva fall" utgår vi ifrån att hunden opereras dagtid och operationen är normal svår. Veterinär arvode, poliklinik arvode, blodprovstagning (inkl. analys),röntgen, operation, narkos, förbrukningsmaterial, stationärvård (normalfallet), akutavgift, hund 30 kg
13		Dental extraction	13	Dental extraction	web/receipt	Consultation fee, veterinary fee, acute fee during regular hours, removal of 3 teeth during anaesthesia, including consumables.	https://vetpris.se/behandlingar/hund/t%C3%A4nder/t%C3%A4nder-utdragning					check	Utdragning av 1-3 enkla tänder. Att dra ut tänder på sina djur är aldrig roligt och kan variera kraftigt i pris. Orsaken till den stora prisvariationen beror på vilken typ av tand man behöver dra ut och hur lång tid ingreppet tar. Borsta gärna tänderna på hunden för att minska risken för problem. Mindre hundar har i regel ett större problem med tänder än hundar av större storlek.	I Vetpris "fiktiva fall" utgår vi ifrån att veterinären drar ut 1-3 enkla tänder, ingreppet sker dagtid, narkos ingår och hunden väger 10kg.
14		TPLO	14	TPLO	receipt/telephone/klinikens egna priser	Veterinary fee, surgery, stationary care (diagnosis made at previous visit), 30 kg bodyweight	https://vetpris.se/behandlingar/hund/operationer/tplo						I Vetpris "fiktiva fall" utgår vi ifrån en hund som väger 30kg där diagnosen redan är ställd. Stationärvård skall ingå samt veterinärarvode och operation. Detta är ingen akut operation och kan således utföras på bokad tid under normala öppettider.
15		Vaccination - distemper, hepatitis, parvo and parainfluensa virus infection	15	Vacc - distemper…	web	Vaccination - distemper, hepatitis, parvo and parainfluensa virus infection	https://vetpris.se/behandlingar/hund/vaccination/dhppi						DHPPI-vaccin är en kombination som ges i en spruta mot hepatit, parvo, valpsjuka, parainfluensa och kennelhosta. Sprutan ger inte ett fullgott skydd mot alla former av kennelhosta. Läs mer om KC till höger. Vaccination som görs från 13 veckors ålder på valp samt vid 1 års ålder. Därefter var 3: e år. Vaccination med DHPPI och intyg ingår.
16		X-ray examination for hip dysplasia	16	X-ray hip dysplasia	web	Sedation, x-ray hips, sending image to SKK (Swedish Kennel Club), 30 kg bodyweight	https://vetpris.se/behandlingar/hund/r%C3%B6ntgen-skk/h%C3%B6fter						I Vetpris "fiktiva fall" ingår röntgen och sedering av höfter samt översändande till SKK. Röntgen sker dagtid och hunden väger 30kg.
17	Cat	Abscess - including drain	17	Abscess - incl drain	receipt	Consultation fee, veterinary fee, acute fee during regular hours, sedation, shaving and inspection, drainage, receipts	https://vetpris.se/behandlingar/katt/operationer/abscess-dr%C3%A4nering-b%C3%B6ld-inkl-dr%C3%A4n						När katten kommer till klinik eller djursjukhus kommer den att undersökas noggrant under sedering och ibland narkos. Områden som misstänks ha blivit bitna blir rakade och tvättade, om det finns några sår kommer dessa att sonderas för att utesluta om en sårficka bildats. I det fall bettet orsakat en sårficka kommer det ofta sättas ett Penrose dränage. Det är en latex-slang som sys på plats i såret…
18		Blood sample large	18	Blood sample large	receipt	Bloodsampling, analysis including inflammation markers and liver/kidney values	https://vetpris.se/behandlingar/katt/unders%C3%B6kningar/blodprov-stort						Blodprov Stort. Detta analyspaketet återspeglar ett prov som tas i bredare diagnostiskt syfte. I paketet skall det ingå kemiska parametrar inklusive lever/njurfunktion, samt inflammationsmarkörer. Detta ger ett helhetsintryck av djurets allmänstatus. Vilket kan ge en indikation på hur vidare vård skall utformas. Detta är kompletterande diagnostik som sällan sker enskilt. Det tillkommer ofta kostn…
19		Dental assessment / scaling	19	Dental assess / scaling	web	Assessment and scaling of teeth during anaesthesia or sedation	https://vetpris.se/behandlingar/katt/tandreng%C3%B6ring/tandsanering-2						Tandrengöring. Avlägsnande av tandsten och putsning av tänder.Rengöring av tänder där tandstenavlägsnas och tänderna poleras. Man räknar alla tänder och tittar efter skador på tänder och munhåla. Om något onormalt uppdagas brukar veterinären efter överenskommelse med djurägare	kunna åtgärda problem	när katten ändå är sövd. Röntgen kan också komma att bli nödvändigt och den kostnaden tillkommer.I Vetpris "fiktiva fall" ingår veterinärarvode	klinikavgift	narkos	avlägsnande av tandsten och polering.
20		Deworming with certificate	20	Deworming cert	web	Veterinarian administrates deworming and signs deworming certificate	https://vetpris.se/behandlingar/katt/intyg/intyg-avmaskning-2						Intyg Avmaskning. När man ska åka utomlands är det viktigt att hålla sig uppdaterad med rådande regelverk. I Sverige har vi haft fall av rävens dvärgbandmask. Därav kräver vissa länder, avmaskning med intyg. Veterinären ger katten avmaskning och skriver under i kattens pass. Avmaskningsmedlet ingår ej.
21		Euthanasia cat	21	Euthanasia	web	Consultation fee or travel fee < 30 km, veterinary fee and the fluid for extinction of life	https://vetpris.se/behandlingar/katt/%C3%B6vrigt/avlivning-2						I priset ska veterinärarvode, poliklinikavgift, avlivningsvätska ingå. Beräknat på katt.
22		GDY female cat	22	GDY female	web	Removal of ovaries and uterus (the latter is an option) during anaesthesia	https://vetpris.se/behandlingar/katt/kastrering/kastrering-hona						Kastrering hona. Kattens fortplantningsförmåga försvinner permanent.Jordbruksverket rekommenderar att katter som rör sig fritt utomhus skall vara kastrerade eller på annat sätt förhindrade att fortplanta sig.Det finns 2 metoder. Ovariehysteriektomi = äggstockar och livmoder avlägsnas.Ovariektomi = Äggstockar avlägsnas. Kastrering gör att honan slutar löpa. Priset skall vara en totalkostnad för ka…
23		GDY male cat	23	GDY male	web	Removal of testes during anaesthesia	https://vetpris.se/behandlingar/katt/kastrering/kastrering-hane						Kastrering hane. Vid kastration av hankatter sövs katten och testiklarna avlägsnas. Kattens fortplantningsförmåga försvinner permanent.Jordbruksverket rekommenderar att katter som rör sig fritt utomhus skall vara kastrerade eller på annat sätt förhindrade att fortplanta sig.Priset skall vara en totalkostnad för kastrering av hankatt.
24		Patella examination with certificate	24	Patella exam cert	web/receipt	Palpation of patella and certification	https://vetpris.se/behandlingar/katt/intyg/intyg-patella						Patellaluxation intyg. Patellaluxation = knäskål ur led.Patellaluxation graderas genom palpation enligt en skala 0-3.I priset ingår patellaintyg
25		Senior check	25	Senior check	web	Clinical examination, bloodsampling including several parameters, urinary sample and sample analyis	https://vetpris.se/behandlingar/katt/%C3%B6vrigt/senior-kontroll						Seniorkontroll är en utmärkt förebyggande åtgärd där man i ett tidigt skede kan upptäcka åldersrelaterade problem.Man kan upptäcka om sköldkörtelns funktion inte är optimal. Man ser om lever- och njurvärdet är normala. Veterinären lyssnar på hjärta och lungor samt känner igenom lymfknutor och rörligheten i ben/leder. Tandhälsan är viktigast när djuret blir äldre och vissa raser har ett större pro…
26		Dental extraction	26	Dental extraction	web/receipt	Consultation fee, veterinary fee, acute fee during regular hours, removal of 3 teeth during anaesthesia, including consumables.	https://vetpris.se/behandlingar/katt/t%C3%A4nder/t%C3%A4nder-utdragning-2						Tänder utdragning. Utdragning av 1-3 enkla tänder.Vi utgår från att kunden bokat utdragning av 3 enkla tänder och hämtar sin katt senare samma dag. Ingreppet sker dagtid.I Vetpris "fiktiva fall" ingår veterinärarvode	poliklinikavgift	narkos	tandextraktion 3 enkla tänder.
27		Vaccination - rhinotracheitis virus, calicivirus	27	Vacc - calicivirus…	web	Vaccination - rhinotracheitis virus, calicivirus	https://vetpris.se/behandlingar/katt/vaccination/ducat-kattsnuva						Ducat kattsnuva. Nobivac Ducat - kattsnuva : Vaccinering sker vid 8 och 12 veckors ålder, därefter rekommenderas årlig påfyllnad.
28	Horse	Euthanasia horse	28	Euthanasia	web	Consultation fee or travel fee < 30 km, veterinary fee and the fluid for extinction of life, 600 kg bodyweight	https://vetpris.se/behandlingar/h%C3%A4st/%C3%B6vrigt/avlivning-2-2						Medicinsk Avlivning. Det finns två vanliga metoder som används vid avlivning av hästar. Mekanisk avlivning = bedövning med bultpistol och avblodning. Det är samma metod som används vid slakt på ett slakteri. Medicinsk avlivning = En veterinär ger hästen en injektion med avlivningsvätska (kallas medicinsk avlivning). Efter avlivningen måste kroppen tas omhand. De vanliga sätten är kremering eller …
29		GDY colt/stallion	29	GDY colt/stallion	web	Consultation fee or travel < 30 km, veterinary fee, sedation, analgesia and castration	https://vetpris.se/behandlingar/h%C3%A4st/kastrering/kastration-hingst						Kastrering av Hingst kan ske på gården hemma eller på klinik. En kastrering hemma på gården sker med lugnande och lokalbedövning. Båda testiklarna måste vara belägna i pungen.I Vetpris "fiktiva fall" ingår ev. resa till gården 3 mil alt grundavgift, veterinärarvode, bedövning, kastrering enligt normalfallet.
30		Health certificate TRACES	30	Health cert TRACES	web	Healt certificate TRACES (no signs of infectious disease)	https://vetpris.se/behandlingar/h%C3%A4st/intyg/h%C3%A4lsointyg-i-traces						Hälsointyg i traces. När du ska åka utomlands med din häst. När du åker utomlands med din häst krävs ett intyg av officiell veterinär. Tänk på att du behöver vara ute i god tid. Anläggningen där hästen står skall vara registrerad med ett SE-nummer. Hästen behöver ha ett pass och intyget skall utfärdas inom 48 tim innan avresan påbörjas. Intyget är giltigt i 10 dagar. I priset skall det ingå framk…	kontroll av djuret samt utfärdat hälsointyg i Traces.
31		Health examination with certificate	31	Health exam cert	web	Consultation fee, veterinary fee, inspection of all areas of the horse, auscultation heart and lungs, examination of the locomotor apparatus by palpation and asymmetry/lameness evaluation	https://vetpris.se/behandlingar/h%C3%A4st/intyg/besiktning						Besiktning. Vid en klinisk undersökning kontrollerar veterinären bland annat ögon, öron, lymfknutor, hud och päls samt rörelseapparaten. Vid besiktningen ingår att studera hur djuret rör sig samt att lyssna på hjärta och lungor.I priset ingår poliklinikavgift, veterinärarvode, besiktning och intyg.
32		Lameness examination initial	32	Lameness exam	reciept	Consultation fee, veterinary fee, exam on straight lines in walk and trot, lunging, flexion tests, local anaesthesia (n=2), sedation, x-ray 4 images, joint treatments (n=2), excluding costs for treatment substances	https://vetpris.se/behandlingar/h%C3%A4st/h%C3%A4lta/h%C3%A4ltutredning						Hältutredning. Enkel.Grundavgift veterinärarvode rörelseundersökning i skritt och trav på volt böjprov 2 bedövningar sedering röntgen 4 bilder ledbehandling 2 st. Exklusive mediciner.
33		Oral examination and treatment	33	Oral exam treat	web	Consultation fee, veterinary fee, sedation and oral examination	https://vetpris.se/behandlingar/h%C3%A4st/t%C3%A4nder/munh%C3%A5launders%C3%B6kning-behandling						Munhåleundersökning. I Vetpris "fiktiva fall" ingår veterinärarvode, poliklinik avgift eller ambulerande veterinär upp till 3 mil, undersökning av munhåla och sedering.
34		Sedation	34	Sedation	web/receipt	Sedation for 600 kg bodyweight	https://vetpris.se/behandlingar/h%C3%A4st/unders%C3%B6kningar/sedering-2						Sedering inför undersökning. Lugnande preparat som ibland krävs vid behandling eller röntgen.I bland behöver djuret vara helt stilla. Sedering är ett lugnande preparat som oftast injiceras i halsvenen. Detta är kompletterande diagnostik som sällan sker enskilt. Olika preparat kan variera i prissättning. I priset ingår sedering. Häst 600 kg
35		Vaccination - influenza	35	Vacc - influenza	web	Vaccination - influenza	https://vetpris.se/behandlingar/h%C3%A4st/vaccination/influensa						Vaccination influenza. Hästinfluensa typ A1 & A2. Grundvaccineringen är 3 sprutor där andra vaccinationen ges 21-56 dagar efter den första sprutan. Den 3:e sprutan ges 90-180 dagar efter andra sprutan. Ex. första vaccination 1 feb, andra vaccination 1 mars, tredje vaccination 1 aug och därefter årligen.
36		Vaccination - tetanus	36	Vacc - tetanus	web	Vaccination - tetanus	https://vetpris.se/behandlingar/h%C3%A4st/vaccination/stelkramp						Vaccination stelkramp. Stelkrampsvaccin ges ofta tillsammans med influensa men kan även ges enskilt vid exempelvis en sårskada. Stelkramp är en vanlig bakterie som förekommer i jord och avföring. En vanligt smittväg är via ett sår eller bett.Vaccination är enda sättet att skydda sig mot stelkramp. Grundvaccinering sker med 2 doser där andra dosen ges 1 månad efter den första dosen. Därefter var 3…
37		X-ray examination extremities one image	37	X-ray limb 1 image	reciept	Consultation fee, x-ray distal limb, 1 image	https://vetpris.se/behandlingar/h%C3%A4st/r%C3%B6ntgen/r%C3%B6ntgen-extremiteter-1-bild						Röntgen/Extremiteter 1 bild. Röntgen är ett sätt att undersöka hästen som visar att det finns några förändringar i hästens skelett som skulle kunna inverka på hållbarheten.Man röntgar man benet för att upptäcka eventuella förändringar.I Vetpris "fiktiva fall" ingår poliklinikavgift och röntgen.I Vetpris "fiktiva fall" ingår poliklinikavgift och röntgen av extremitet 1 bild.
	Footnotes
	GDY	Gonadectomy
	TPLO	tibial plateau levelling osteotomy
	TRACES	TRACES (European commission. 2024. TRACES at a glancehttps://food.ec.europa.eu/horizontal-topics/traces_en[accessed July 14, 2024]

## Sheet: ST2
			item	Country				Hours open mon-fri								On call category										Anim hosp				Chain														Total		last edited 240805
		Species		NO		SE		Less than 35 hours		35<=45h		45<=60h		More 60h		24 h on call all days		On call >= 12 h a day		Open < 12 h/day Sat and/or Sun		Part of 24 h call all days		No on call		Yes		No		Anicura		Districts vet		Dyrenes venn		Empet		Evidensia		None		Vettris		N
	1	Dog	Blood sample (CRP)	15	16	77	84	7	8	61	66	19	21	5	5	5	5	7	8	5	5	53	58	22	24	11	12	81	88	6	7	51	55					10	11	25	27			92
	2		Caesarean section	8	6	125	94	14	11	74	56	33	25	12	9	16	12	13	10	8	6	33	25	63	47	20	15	113	85	22	17	30	23					26	20	50	38	5	4	133
	3		Claw injury			137	100	16	12	88	64	27	20	6	4	7	5	5	4	8	6	50	36	67	49	9	7	128	93	6	4	50	36					18	13	59	43	4	3	137
	4		Dental assess / scaling	196	42	273	58	66	14	247	53	148	32	8	2	35	7	11	2	46	10	90	19	287	61	25	5	444	95	52	11	66	14	8	2	12	3	62	13	259	55	10	2	469
	5		Deworming cert	130	35	246	65	44	12	213	57	110	29	9	2	24	6	8	2	44	12	76	20	224	60	17	5	359	95	35	9	66	18	8	2	12	3	62	16	182	48	11	3	376
	6		EU passport	131	26	368	74	70	14	268	54	144	29	17	3	30	6	16	3	47	9	85	17	321	64	28	6	471	94	44	9	66	13	7	1	12	2	85	17	274	55	11	2	499
	7		Euthanasia	65	21	245	79	49	16	189	61	64	21	8	3	18	6	11	4	27	9	73	24	181	58	13	4	297	96	17	5	66	21	8	3			53	17	157	51	9	3	310
	8		GDY bitch	43	11	360	89	46	11	241	60	100	25	16	4	22	5	14	3	33	8	77	19	257	64	22	5	381	95	33	8	66	16	1	0			68	17	224	56	11	3	403
	9		GDY male dog	34	10	314	90	31	9	207	59	94	27	16	5	20	6	14	4	26	7	74	21	214	61	23	7	325	93	31	9	66	19	1	0			65	19	175	50	10	3	348
	10		Ophthal exam cert	23	28	59	72	7	9	27	33	40	49	8	10	11	13	7	9	12	15	2	2	50	61	13	16	69	84	26	32							13	16	42	51	1	1	82
	11		Otitis	4	4	102	96	9	8	81	76	13	12	3	3	6	6	3	3	1	1	63	59	33	31	5	5	101	95	3	3	63	59					9	8	31	29			106
	12		Pyometra	8	6	119	94	10	8	72	57	36	28	9	7	13	10	9	7	11	9	33	26	61	48	19	15	108	85	12	9	29	23					24	19	58	46	4	3	127
	13		Dental extraction	6	5	126	95	21	16	89	67	20	15	2	2	6	5	4	3	8	6	69	52	45	34	6	5	126	95	3	2	66	50					9	7	54	41			132
	14		TPLO			32	100	1	3	8	25	12	38	11	34	12	38	10	31	2	6			8	25	19	59	13	41	9	28							11	34	12	38			32
	15		Vacc distemper…	55	11	447	89	65	13	285	57	136	27	16	3	27	5	18	4	47	9	68	14	342	68	27	5	475	95	46	9	66	13	7	1			92	18	280	56	11	2	502
	16		X-ray hip dysplasia	169	39	259	61	45	11	223	52	146	34	14	3	37	9	13	3	44	10	90	21	244	57	29	7	399	93	58	14	66	15	8	2	12	3	78	18	197	46	9	2	428
	17	Cat	Abscess incl drain	3	3	95	97	10	10	74	76	12	12	2	2	3	3	1	1	1	1	63	64	30	31	3	3	95	97	4	4	63	64					7	7	24	24			98
	18		Blood sample large	22	44	28	56	7	14	25	50	14	28	4	8	2	4	4	8	6	12	6	12	32	64	4	8	46	92	6	12	2	4					11	22	31	62			50
	19		Dental assess / scaling	192	44	249	56	64	15	229	52	142	32	6	1	31	7	8	2	42	10	88	20	272	62	21	5	420	95	49	11	66	15	8	2	12	3	57	13	239	54	10	2	441
	20		Deworming cert	129	35	241	65	42	11	211	57	107	29	10	3	23	6	9	2	44	12	76	21	218	59	16	4	354	96	35	9	66	18	8	2	12	3	63	17	175	47	11	3	370
	21		Euthanasia	64	21	248	79	48	15	190	61	66	21	8	3	17	5	11	4	24	8	73	23	187	60	13	4	299	96	19	6	66	21	8	3			50	16	160	51	9	3	312
	22		GDY female	216	36	386	64	87	14	318	53	181	30	16	3	44	7	16	3	57	9	95	16	390	65	30	5	572	95	66	11	66	11	8	1	12	2	93	15	346	57	11	2	602
	23		GDY male	217	35	403	65	89	14	333	54	182	29	16	3	45	7	16	3	57	9	95	15	407	66	30	5	590	95	66	11	66	11	8	1	12	2	93	15	364	59	11	2	620
	24		Patella exam with certificate	27	28	70	72	11	11	46	47	35	36	5	5	8	8	3	3	11	11	3	3	72	74	4	4	93	96	11	11							16	16	65	67	5	5	97
	25		Senior check	15	18	67	82	9	11	42	51	29	35	2	2	4	5	2	2	12	15	2	2	62	76	4	5	78	95	8	10							8	10	59	72	7	9	82
	26		Dental extraction	6	6	91	94	17	18	69	71	9	9	2	2	2	2	1	1	3	3	69	71	22	23	3	3	94	97			66	68					5	5	25	26	1	1	97
	27		Vacc calicivirus…	53	12	395	88	57	13	249	56	127	28	15	3	22	5	17	4	46	10	68	15	295	66	24	5	424	95	43	10	66	15	7	2			92	21	229	51	11	2	448
	28	Horse	Euthanasia	3	3	90	97	9	10	76	82	7	8	1	1	4	4	2	2	2	2	68	73	17	18	3	3	90	97			68	73					3	3	22	24			93
	29		GDY colt/stallion	2	2	94	98	9	9	80	83	6	6	1	1	4	4	2	2	1	1	69	72	20	21	2	2	94	98			68	71					4	4	24	25			96
	30		Health cert TRACES			67	100	7	10	59	88	1	1							1	1	66	99					67	100			66	99							1	1			67
	31		Health exam cert	4	4	109	96	14	12	88	78	10	9	1	1	6	5	3	3			68	60	36	32	2	2	111	98			68	60					7	6	38	34			113
	32		Lameness exam initial	2	2	92	98	11	12	75	80	7	7	1	1	4	4	2	2	1	1	61	65	26	28	3	3	91	97			60	64					4	4	30	32			94
	33		Oral exam treat	7	6	102	94	13	12	85	78	10	9	1	1	7	6					70	64	32	29	4	4	105	96	1	1	68	62					5	5	35	32			109
	34		Sedation	2	2	105	98	12	11	85	79	10	9			5	5	2	2	1	1	69	64	30	28	2	2	105	98	1	1	68	64							38	36			107
	35		Vacc influenza	1	1	127	99	14	11	102	80	11	9	1	1	4	3	4	3	1	1	68	53	51	40	1	1	127	99	2	2	68	53					6	5	52	41			128
	36		Vacc tetanus	1	1	101	99	12	12	81	79	9	9			3	3	3	3			68	67	28	27	1	1	101	99	1	1	68	67					3	3	30	29			102
	37		X-ray limb 1 image	1	1	82	99	7	8	70	84	5	6	1	1	3	4	1	1	1	1	60	72	18	22	3	4	80	96			60	72					4	5	19	23			83
																																												127	median number of clinics

## Sheet: ST3
			Extraction date										Total
	Species	Procedure	I		II		III		IV		V		N
	Dog	Blood sample (CRP)	27	10	33	12	34	13	86	32	88	33	268																										1375
		Caesarean section	93	18	98	19	92	18	120	23	122	23	525																										1845
		Claw injury	69	14	78	16	75	15	129	27	133	27	484																										1586
		Dental assess / scaling	379	18	441	21	435	20	435	20	438	21	2128																										493
		Deworming cert	281	17	324	20	334	20	349	21	356	22	1644																										525
		EU passport	416	18	452	20	459	20	471	21	476	21	2274																										407
		Euthanasia	260	19	274	20	272	20	282	21	287	21	1375																										484
		GDY bitch	360	20	377	20	370	20	365	20	373	20	1845																										584
		GDY male dog	320	20	331	21	323	20	304	19	308	19	1586																										2133
		Ophthal exam cert	69	19	74	20	72	20	72	20	74	20	361																										361
		Otitis	29	7	96	24	93	23	94	23	95	23	407																										1945
		Pyometra	84	17	89	18	84	17	115	23	121	25	493																										1649
		Dental extraction	117	20	120	21	118	20	113	19	116	20	584																										268
		TPLO	23	17	26	19	27	20	30	22	30	22	136																										2211
		Vacc distemper…	418	19	422	19	426	19	467	21	478	22	2211																										136
		X-ray hip dysplasia	360	19	399	21	397	20	391	20	393	20	1940																										426
	Cat	Abscess incl drain	27	7	90	24	89	24	85	22	87	23	378																										1383
		Blood sample large	32	15	41	20	43	20	46	22	48	23	210																										2758
		Dental assess / scaling	350	18	412	21	408	20	409	21	412	21	1991																										2854
		Deworming cert	277	17	322	20	329	20	344	21	350	22	1622																										1996
		Euthanasia	256	19	273	20	274	20	287	21	293	21	1383																										368
		GDY female	503	18	565	21	558	20	560	20	567	21	2753																										378
		GDY male	519	18	581	20	575	20	584	20	590	21	2849																										423
		Patella exam with certificate	75	18	92	22	86	20	85	20	85	20	423																										2133
		Senior check	67	18	75	20	74	20	75	20	77	21	368																										1947
		Dental extraction	86	20	87	20	87	20	82	19	84	20	426																										1627
		Vacc calicivirus…	369	19	373	19	372	19	413	21	420	22	1947																									210
	Horse	Euthanasia	87	20	89	21	89	21	83	19	84	19	432																										246
		GDY colt/stallion	88	20	89	20	89	20	86	20	87	20	439																										501
		Health cert TRACES			63	26	62	25	60	24	61	25	246																										463
		Health exam cert	100	19	106	21	107	21	104	20	100	19	517																										576
		Lameness exam initial	29	10	33	12	34	12	93	33	93	33	282																										224
		Oral exam treat	101	20	101	20	101	20	99	20	99	20	501																										517
		Sedation	97	20	99	20	102	21	98	20	98	20	494																										282
		Vacc influenza	111	19	116	20	117	20	115	20	117	20	576																										494
		Vacc tetanus	94	20	92	20	94	20	92	20	91	20	463																										432
		X-ray limb 1 image	19	8	19	8	22	10	82	37	82	37	224

## Sheet: ST4
	National currency- NOK/SEK															Logarithm of Euro
	Species	Procedure	N	Mean	SD	Min	25th Pctl	Median	75th Pctl	Max	Skewness	Kurtosis				Species	Procedure	N	Mean	SD	Min	25th Pctl	Median	75th Pctl	Max	Skewness	Kurtosis
	Dog	Blood sample (CRP)	268	1203.27	505.915	468	990	990	1375	2884	1.25159	1.17882				Dog	Blood sample (CRP)	268	4.5897	0.388136	3.67983	4.4524	4.49087	4.79066	5.5601	0.323871	-0.0915136
		Caesarean section	525	26203.9	8675.25	7940	20000	25325	30000	60000	0.914284	2.01372					Caesarean section	525	7.68944	0.339689	6.52719	7.49443	7.70301	7.8999	8.59526	-0.503256	1.32475
		Claw injury	484	3610.53	1512.58	1180	2790	3445	4000	10000	1.66161	3.9441					Claw injury	484	5.68642	0.384875	4.62797	5.50383	5.69938	5.84875	6.80351	0.141973	0.56528
		Dental assess / scaling	2128	3374.43	1018.52	900	2660	3340	4000	8500	0.503019	0.700715					Dental assess / scaling	2128	5.65056	0.318131	4.34239	5.4584	5.66842	5.87043	6.64099	-0.594632	1.01247
		Deworming cert	1644	290.883	105.511	50	230	280	330	980	1.75231	6.28243					Deworming cert	1644	3.18847	0.336116	1.55918	3.01727	3.18949	3.36031	4.48072	0.0794402	0.971007
		EU passport	2274	675.102	158.604	250	575	687.5	750	1950	1.36313	7.2978					EU passport	2274	4.06127	0.230242	3.05282	3.91992	4.09861	4.19065	5.16875	-0.103726	1.29316
		Euthanasia	1375	1637.45	564.18	730	1380	1450	1718	4186.67	1.78328	3.31674					Euthanasia	1375	4.92399	0.300085	4.17966	4.8084	4.8557	5.02777	5.95046	0.855542	0.969682
		GDY bitch	1586	7768.84	1415.94	4470	6930	7631.67	8189	16816.7	1.68746	6.31468					GDY bitch	1586	6.51208	0.172056	5.98537	6.40483	6.51229	6.58223	7.29396	0.629661	2.01833
		GDY male dog	1845	4564.66	933.674	1933.33	3933.33	4533.33	4995	9176.67	0.895651	2.27961					GDY male dog	1845	5.97484	0.203363	5.09714	5.85048	5.97002	6.08401	6.69475	-0.0691114	1.47525
		Ophthal exam cert	361	1095.49	334.998	670	875	995	1200	2270	1.36408	1.49761					Ophthal exam cert	361	4.5319	0.279594	4.04607	4.33618	4.46721	4.67219	5.30672	0.764759	-0.0276999
		Otitis	407	1834.61	580.132	650	1830	1830	1830	4929	1.93701	7.15315					Otitis	407	5.03714	0.297437	4.00833	5.04343	5.06677	5.10524	6.09606	-0.11084	2.55279
		Pyometra	493	22869.3	8137.92	7685	17700	22200	25325	65392	1.25546	3.36068					Pyometra	493	7.54875	0.351579	6.50172	7.33602	7.59196	7.73271	8.68132	-0.237792	0.78419
		Dental extraction	584	7667.82	2676.61	1740	5708	8810	9250	18300	-0.13252	1.41761					Dental extraction	584	6.43155	0.451267	5.00737	6.21138	6.66374	6.70876	7.40782	-1.41326	1.62429
		TPLO	136	48340.5	9336.64	32000	42111.5	46980	55000	70000	0.304529	-0.466297					TPLO	136	8.33624	0.198254	7.90485	8.21012	8.33136	8.49834	8.74942	-0.108637	-0.625001
		Vacc distemper…	2210	530.826	145.947	300	450	499	550	1300	2.62128	7.84597					Vacc distemper…	2210	3.81646	0.225379	3.23514	3.68593	3.78535	3.86604	4.76328	1.6462	3.6388
		X-ray hip dysplasia	1939	2087.08	578.85	950	1700	1900	2418	4020	0.927117	0.161345					X-ray hip dysplasia	1939	5.1826	0.267376	4.38782	5.00713	5.12456	5.3743	5.87926	0.393313	-0.422844
	Cat	Abscess incl drain	378	3343.9	1226.89	1400	2480	3520	3595	9182	2.85874	10.5682				Cat	Abscess incl drain	378	5.63316	0.29857	4.77559	5.39239	5.742	5.78046	6.71817	1.03937	2.83757
		Blood sample large	210	2209.07	857.159	860	1502	2035	2800	4169	0.573333	-0.462499					Blood sample large	210	5.19851	0.39549	4.34239	4.90518	5.19078	5.50796	5.9286	-0.164858	-0.633106
		Dental assess / scaling	1991	2614.76	887.962	280	2000	2315	3200	5594	0.655922	-0.0053802					Dental assess / scaling	1991	5.38557	0.347625	3.16615	5.17978	5.32851	5.65353	6.22261	-0.3996	1.34384
		Deworming cert	1622	291.355	105.915	100	230	280	325	980	1.75882	6.23097					Deworming cert	1622	3.19009	0.335522	2.13653	3.01831	3.18949	3.36008	4.48072	0.119669	0.75263
		Euthanasia	1383	1255.84	383.555	400	990	1260	1450	3350	0.899495	2.52131					Euthanasia	1383	4.66167	0.310458	3.58241	4.45278	4.72406	4.8557	5.70988	-0.27856	0.353733
		GDY female	2753	1965.52	749.679	600	1480	1690	2350	5840	1.51256	2.74046					GDY female	2753	5.09626	0.344544	3.92829	4.84229	5.0017	5.34428	6.25167	0.598005	-0.0095326
		GDY male	2849	1080.37	424.732	400	790	930	1254	3820	1.6862	3.79867					GDY male	2849	4.49582	0.34687	3.52282	4.22673	4.41116	4.72184	5.82719	0.721609	0.126354
		Patella exam with cert	423	759.604	240.611	250	570	700	930	1350	0.383748	-0.431115					Patella exam with cert	423	4.15165	0.335774	3.05282	3.92201	4.14425	4.40617	4.80102	-0.517231	0.622149
		Senior check	368	2055.38	727.427	810	1580	1825	2498	6080	1.17827	2.16846					Senior check	368	5.1425	0.337564	4.22839	4.93298	5.08648	5.40215	6.29299	0.193829	-0.0466638
		Dental extraction	426	5605.63	1652.7	1530	5570	5570	6000	11605	0.439036	3.4869					Dental extraction	426	6.1483	0.356632	4.87302	6.15651	6.20153	6.27332	6.95236	-1.64188	3.97586
		Vacc calicivirus…	1946	504.569	140.19	225	450	485	510	1150	2.64765	8.3871					Vacc calicivirus…	1946	3.76479	0.231175	2.94746	3.66259	3.75426	3.81079	4.62671	1.33	4.05026
	Horse	Euthanasia	432	4044.55	1148.4	2000	2860	4110	5040	9700	1.22262	4.98022				Horse	Euthanasia	432	5.83617	0.270429	5.13226	5.54952	5.87588	6.05652	6.77305	-0.0585129	0.397234
		GDY colt/stallion	439	5425.6	1393.67	2500	4350	5680	6610	10100	0.269189	0.559164					GDY colt/stallion	439	6.13344	0.265878	5.35541	5.96887	6.19941	6.3277	6.81346	-0.573182	0.304245
		Health cert TRACES	246	2863.35	104.308	1234	2870	2870	2870	2870	-15.6844	246					Health cert TRACES	246	5.52254	0.0568892	4.71118	5.49343	5.5276	5.53844	5.55523	-11.92
		Health exam cert	517	3821.66	1436.79	1195	2600	3860	5900	5940	0.245174	-1.12653					Health exam cert	517	5.74036	0.399152	4.61726	5.45421	5.81312	6.21407	6.28263	-0.458376	170.075
		Lameness exam initial	282	3967.46	2503.22	1000	2900	3470	3740	16000	2.60151	8.58578					Lameness exam initial	282	5.71754	0.506579	4.43912	5.54884	5.70661	5.80322	7.27351	0.425561	-0.392283
		Oral exam treat	501	2530.72	835.833	843	1730	2700	2930	4120	0.1363	-1.01416					Oral exam treat	501	5.34725	0.350376	4.32791	5.04682	5.43237	5.57592	5.94121	-0.320652	0.991906
		Sedation	494	693.561	299.037	136	460	590	1010	1100	-0.0265019	-1.49338					Sedation	494	3.99744	0.506908	2.44402	3.70019	3.97329	4.49408	4.59623	-0.667365	-0.855802
		Vacc influenza	575	557.81	123.96	195	545	580	580	1125	0.897479	5.26426					Vacc influenza	575	3.86748	0.235879	2.80436	3.86462	3.90308	3.95397	4.6187	-1.10558	-0.332609
		Vacc tetanus	463	545.95	116.407	196	550	580	580	1125	0.239878	4.31193					Vacc tetanus	463	3.84627	0.238395	2.86906	3.89439	3.90086	3.9394	4.6187	-1.3307	4.87062
		X-ray limb 1 image	224	1958.14	373.389	1000	1860	2040	2040	3380	0.500392	3.99974					X-ray limb 1 image	224	5.1323	0.201922	4.43912	5.08165	5.1754	5.21387	5.7188	-0.85764	3.52135
																											2.58703

## Sheet: ST5
	Species		Extraction date										Total	Change over year	Change over year
		Procedure	I		II		III		IV		V		N	(%)	(%)
	Dog	Blood sample (CRP)	125.231	57.2821	116.793	56.2407	110.344	50.9515	99.7948	37.675	101.789	37.9847	268	-18.7193	median	6.74611
		Caesarean section	2272.69	781.803	2246.81	752.374	2201.39	719.795	2325.37	745.798	2450.26	802.877	525	7.81317	dog
		Claw injury	319.992	154.214	317.847	149.104	309.799	142.985	310.638	117.488	328.941	121.555	484	2.79663
		Dental assess / scaling	297.695	85.2347	292.623	87.3173	283.202	85.5814	302.66	89.8684	315.553	97.4046	2128	5.99887
		Deworming cert	25.4856	9.01995	25.1345	9.04049	24.0947	8.65381	26.1513	8.89682	27.3825	10.4026	1644	7.44305
		EU passport	58.3932	12.4311	58.2286	12.4232	56.2923	12.3919	60.7878	14.8486	63.988	16.3511	2274	9.58128
		Euthanasia	140.702	46.5036	139.841	42.0106	135.813	41.2101	149.301	55.3243	157.002	61.688	1375	11.5847
		GDY bitch	400.574	79.0532	403.882	81.5732	385.616	77.3077	399.414	84.5833	421.931	90.2892	1845	5.33172
		GDY male dog	677.762	121.603	689.173	126.752	659.359	120.073	681.884	132.392	716.378	129.948	1586	5.69759
		Ophthal exam cert	92.4416	28.3507	94.266	27.4276	91.5013	25.7471	100.464	34.6332	105.431	32.6952	361	14.0516
		Otitis	159.299	74.6221	161.12	44.6289	154.097	42.6413	160.348	52.6672	168.935	55.5489	407	6.04918
		Pyometra	1908.14	661.093	1939.45	723.424	1882.15	674.568	2012.93	623.163	2245.87	825.994	493	17.6997
		Dental extraction	688.955	224.653	679.39	244.133	657.23	227.402	664.982	235.42	683.977	248.131	584	-0.722621
		TPLO	4325.21	839.975	4159.38	860.48	3938.82	829.798	4246.7	777.294	4571.47	808.583	136	5.69356
		Vacc distemperâ€¦	45.3903	10.0885	44.8408	8.87881	43.9206	10.8801	48.2331	15.473	50.8284	16.179	2210	11.9807
		X-ray hip dysplasia	176.71	48.2733	179.9	46.0488	174.905	45.8943	192.278	58.2553	199.885	57.0678	1939	13.1146
	Cat	Abscess incl drain	357.477	175.577	257.852	108.851	245.867	96.8524	321.581	83.6449	333.467	86.1338	378	-6.71633	median	9.40299
		Blood sample large	210.549	78.0366	194.305	74.8666	186.59	71.4769	191.484	74.5001	197.044	79.3991	210	-6.4144	cat
		Dental assess / scaling	228.451	73.2069	224.959	74.8064	219.217	74.5436	236.291	79.348	247.055	86.1543	1991	8.14349
		Deworming cert	25.5376	8.7861	25.1789	9.2601	24.2982	9.00911	26.1595	8.95749	27.2971	10.1808	1622	6.88994
		Euthanasia	108.566	31.2139	108.032	30.701	104.115	29.8615	113.174	36.0343	119.714	39.3639	1383	10.2679
		GDY female	168.196	68.4898	171.542	63.1753	166.35	62.9177	178.943	71.7777	184.678	69.5486	2753	9.79888
		GDY male	92.471	39.5707	94.2325	36.0328	91.0736	34.95	98.7833	40.6532	101.317	39.038	2849	9.5661
		Patella exam with certificate	62.8709	18.7773	66.5655	20.9268	65.0773	20.4595	68.3187	21.5708	71.816	23.6934	423	14.2277
		Senior check	176.59	58.1867	178.75	58.8578	174.444	62.0144	182.898	67.4216	193.195	74.5602	368	9.40299
		Dental extraction	560.299	142.155	478.587	132.792	466.963	135.88	476.318	148.105	485.77	156.181	426	-13.3016
		Vacc calicivirusâ€¦	42.6465	8.64718	42.2929	7.70968	41.2478	9.35935	46.3402	15.4664	49.0121	16.143	1946	14.9265
	Horse	Euthanasia	270.437	79.1302	410.665	95.8197	393.173	92.7462	343.322	78.4479	355.736	81.591	432	31.5412	median	7.48829
		GDY colt/stallion	392.059	86.5499	537.362	122.298	512.452	118.535	461.517	106.779	479.222	109.457	439	22.2319	horse
		Health cert TRACES			254.282	3.438e-13	243.089	2.86537e-14	248.829	2.00631e-13	256.171	18.8731	246	0.742698
		Health exam cert	235.82	54.2306	417.291	146.548	398.462	138.33	298.534	73.3562	318.283	64.7657	517	34.9689
		Lameness exam initial	418.075	300.435	404.397	298.517	362.979	272.463	321.753	169.12	331.917	175.878	282	-20.6083
		Oral exam treat	161.393	43.2862	283.383	89.6911	210.291	49.8669	224.76	58.6507	233.939	59.9739	501	44.9498
		Sedation	75.4269	29.4284	71.205	27.4992	67.0187	26.6344	44.4071	12.1173	46.7234	12.9588	494	-38.0547
		Vacc influenza	48.076	10.1357	49.9285	11.1735	47.6939	10.6587	48.6936	11.0486	50.9675	11.537	575	6.01446
		Vacc tetanus	47.5817	10.3399	49.2059	9.96708	46.8091	9.5383	47.2683	10.5083	49.4051	11.1601	463	3.8321
		X-ray limb 1 image	165.108	49.6464	163.349	49.0884	158.247	44.8983	173.324	25.0187	179.906	25.5827	224	8.96212
													median	7.81317
													change

## Sheet: ST6
							edited 240805
		Extraction date	I														V															Change in percent from I to V
			Anicura		Districts vet		Dyrenes venn		Empet		Evidensia		Independent		Vettris		Anicura		Districts vet		Dyrenes venn		Empet		Evidensia		Independent		Vettris			Anicura	Districts vet	Dyrenees venn	Empet	Evidensia	Independent	Vettris
	Species	Procedure	mean	(SD)	mean	(SD)	mean	(SD)	mean	(SD)	mean	(SD)	mean	(SD)	mean	(SD)	mean	(SD)	mean	(SD)	mean	(SD)	mean	(SD)	mean	(SD)	mean	(SD)	mean	(SD)
	Dog	Blood sample (CRP)	141.455	60.8577							135.286	76.2216	115.131	47.8727			127.959	57.3734	89.199	1.43523e-14					135.665	67.555	112.753	51.0031				-9.54073				0.279743	-2.06562
		Caesarean section	2883.87	879.364	2615.03	837.638					2292.85	641.081	1894.04	595.726	2265.48	350.495	3097.19	1002.48	2299.34	94.531					2948.36	869.208	2064.66	686.176	2270.52	351.274		7.39694	-12.0722			28.5893	9.0084	0.222469
		Claw injury	528.882	146.79							374.669	217.973	281.977	101.679	332.75	206.487	507.593	119.643	310.394	2.29682e-13					456.981	213.1	296.168	109.927	328.054	169.321		-4.02516				21.969	5.03255	-1.4112
		Dental assess / scaling	366.955	72.1898	285.688	1.5611	249.516	66.2534	301.582	13.6006	371.488	95.3273	264.497	80.3843	325.213	94.2163	400.128	79.9585	300.934	2.86744e-13	353.099	0	312.704	11.6056	436.718	52.8611	274.585	90.5023	357.697	67.3505		9.0402	5.33645	41.5137	3.68797	17.5591	3.81398	9.98845
		Deworming cert	33.3528	10.6741	24.2592	0.111507	13.7893	1.3449	19.9708	3.00729	34.0132	10.6397	21.9187	6.54262	25.5766	12.4919	33.6327	13.4573	25.228	7.16642e-15	26.6825	0	22.4578	2.31077	36.8676	10.3732	24.1976	9.79497	26.5344	7.03207		0.839069	3.99367	93.5013	12.4534	8.3919	10.3971	3.74523
		EU passport	68.6683	11.4859	61.9895	0.334522	64.5313	2.54162	53.3901	1.68049	63.7899	9.77625	53.7559	13.651	50.4666	8.85889	80.452	14.1151	64.9025	0.2346	93.3889	0	68.1887	4.84687	73.156	13.7964	57.8939	16.0947	56.2306	10.9552		17.1603	4.69924	44.7186	27.7179	14.6826	7.69784	11.4214
		Euthanasia	125.89	16.129	123.993	0.557536	200.5	13.9468			174.195	58.0302	136.856	50.0242	115.2	26.6013	151.188	11.408	130.645	2.0066e-13	309.517	0			217.002	72.7707	144.964	55.0614	124.113	24.4803		20.0952	5.36495	54.3727		24.5739	5.9244	7.73636
		GDY bitch	473.832	82.1839	390.719	2.78768	465.984	0			443.599	65.4141	376.934	84.5724	376.381	36.5451	526.074	90.8465	411.635	0.899144					485.576	57.5504	392.099	90.9413	408.513	57.1878		11.0254	5.35305			9.46287	4.02347	8.5371
		GDY male dog	754.47	112.059	679.948	4.79481	808.34	0			710.296	106.034	651.905	144.954	607.266	91.8656	813.571	91.2204	716.295	8.05008e-13					783.422	75.1303	678.692	150.922	666.732	80.5038		7.83346	5.34551			10.2951	4.10902	9.79245
		Ophthal exam cert	94.2685	24.2102							104.848	32.1924	87.5587	29.5189	73.2685	0	107.291	24.6031							131.168	38.9464	96.1287	31.2394				13.8148				25.1035	9.78779
		Otitis	157.325	86.8355							174.958	50.0761	154.016	83.0498			270.12	246.049	164.883	1.43328e-13					240.544	63.5377	160.611	77.3185				71.6951				37.4868	4.28252
		Pyometra	2168.88	507.748	1386.66	117.539					2233.5	860.572	1743.04	562.587	1977.8	319.956	2509.42	671.112	2281.78	9.26184e-13					3083.43	1243.13	1887.31	641.064	1982.2	320.668		15.7011	64.5521			38.0535	8.2765	0.222469
		Dental extraction	699.512	0	788.617	23.8831					567.397	330.284	560.827	293.015			463.474	336.008	833.425	4.58939e-13					663.887	292.013	539.484	281.021				-33.7432	5.6819			17.0056	-3.80562
		TPLO	4445.06	965.234							4476.53	694.754	4019.81	839.678			4687.54	863.955							4549.54	587.875	4508.99	1006.15				5.45521				1.63095	12.1691
		Vacc distemperâ€¦	57.0792	16.6033	44.0095	0.334522					47.9341	8.44838	43.2261	9.20527	41.7626	4.83063	67.8798	21.4613	45.951	1.43328e-14	96.9465	1.55672e-14			60.6649	20.2777	45.2183	9.6384	44.19	5.71071		18.922	4.41153			26.5589	4.60875	5.81218
		X-ray hip dysplasia	208.148	52.7487	150.05	0.669043	190.78	11.8015	203.48	29.9709	182.259	45.9224	172.337	54.0376	154.5	12.0661	234.413	52.9524	157.675	5.73772e-14	317.967	0.487154	269.494	10.3862	213.432	60.4813	189.858	53.0153	171.246	21.9717		12.6183	5.08163	66.6666	32.4424	17.1036	10.1665	10.8393
	Cat	Abscess incl drain	493.221	202.544							443.361	262.112	285.966	62.7516			406.998	115.806	323.909	5.73314e-14					661.394	253.648	304.356	75.491				-17.4816				49.1773	6.4307
		Blood sample large	224.152	53.9902	168.562	0					280.205	68.7428	168.891	64.3402			228.292	58.4377	129.068	56.3836					278.419	77.8827	170.139	63.7931				1.84687	-23.43			-0.637505	0.739063
		Dental assess / scaling	279.622	66.7354	190.56	1.1234	229.961	35.4718	270.192	17.6121	289.624	74.4764	206.36	72.5434	280.488	69.0418	315.836	67.1426	200.923	5.73578e-14	265.046	0	281.427	20.3896	358.022	54.8815	215.703	78.0887	321.657	53.8734		12.951	5.43799	15.2572	4.15814	23.6164	4.52765	14.6776
		Deworming cert	32.1427	10.0097	24.2592	0.111507	13.7893	1.3449	19.9708	3.00729	34.0132	10.6397	22.2166	6.36904	25.5766	12.4919	33.4505	13.6233	25.228	7.16642e-15	26.6825	0	22.4578	2.31077	37.0826	10.3883	23.853	9.07565	26.5344	7.03207		4.069	3.99367	93.5013	12.4534	9.02412	7.36535	3.74523
		Euthanasia	110.689	14.9421	123.993	0.557536	102.41	6.22016			121.679	37.7459	97.4423	34.5387	76.3508	17.7471	128.302	16.3739	130.645	2.0066e-13	176.994	0			141.993	32.3992	107.81	44.746	84.2435	18.6975		15.9121	5.36495	72.8297		16.695	10.6399	10.3374
		GDY female	237.321	106.289	126.759	0	221.105	14.6005	215.526	12.1537	172.141	59.3558	157.931	57.1531	128.917	10.9692	261.718	98.9757	133.348	2.86886e-14	309.517	0	241.625	11.0851	194.663	64.7677	173.768	57.0322	139.573	13.6759		10.2801	5.19805	39.9867	12.1097	13.0834	10.0279	8.26619
		GDY male	133.189	65.0373	67.3697	0.446029	116.258	10.4392	114.483	26.1901	97.2086	36.3456	86.4909	30.5475	74.1585	8.01074	140.383	55.8212	71.1632	0.11934	176.994	0	130.819	3.98587	110.809	39.4956	95.6203	32.0214	79.4436	9.65114		5.40163	5.6309	52.2421	14.2688	13.9906	10.5554	7.12678
		Patella exam with certificate	81.4494	15.1573							67.1667	18.9124	59.0678	17.1157	44.051	2.7709	103.255	12.3699							88.5483	19.2508	65.767	20.8863	52.6184	6.35029		26.7715				31.8336	11.3415	19.4488
		Senior check	222.408	49.5656							184.346	66.9536	173.036	59.294	146.37	15.9047	268.748	75.2902							209.783	44.7849	186.134	75.4732	156.714	16.0776		20.8354				13.7982	7.56959	7.06695
		Dental extraction			599.149	15.7237					575.36	203.42	394.521	227.975	988.9	0			507.886	44.7086					790.327	228.592	380.355	201.431	991.1	0			-15.2322			37.3622	-3.5906	0.222469
		Vacc calicivirus…	49.1035	13.1158	44.0095	0.334522					45.2307	6.71342	40.1682	8.90246	39.1474	5.15047	61.7586	20.4913	45.951	1.43328e-14	96.9465	1.55672e-14			58.438	20.1347	42.7959	9.5859	40.7498	5.95739		25.7722	4.41153			29.1999	6.54191	4.09327
	Horse	Euthanasia			256.966	1.20813					644.253	203.05	257.561	36.8692					370.311	2.86616e-13					645.687	203.502	272.673	54.7102					44.1087			0.222469	5.8674
		GDY colt/stallion			388.703	13.5645					722.796	173.793	327.466	49.8252					511.768	0					764.949	174.464	344.626	77.5358					31.6603			5.83194	5.2404
		Health cert TRACES			254.282	3.438e-13													258.587	3.43939e-13							111.183	0					1.693
		Health exam cert			233.539	1.64745					329.483	123.719	220.666	77.2753					347.786	0					390.133	75.6443	253.541	69.8357					48.9201			18.4074	14.8978
		Lameness exam initial			438.262	111.246					638.065	569.333	378.061	244.14					313.052	3.1406					677.552	530.533	323.274	231.416					-28.5696			6.18851	-14.4916
		Oral exam treat	164.331	0	156.345	6.69965					261.519	95.731	155.487	59.2954			152.98	0	263.648	2.67533					287.689	55.5867	174.233	68.0344				-6.90737	68.6314			10.007	12.0563
		Sedation	49.071	0	94.4903	5.58011							34.3658	14.2082			46.2497	0	53.159	7.16539e-14							36.3	16.4858				-5.74938	-43.7413				5.62847
		Vacc influenza	73.9742	15.6188	49.4047	0.329491					51.3509	8.90745	43.8275	15.4119			79.1582	0	52.258	5.01577e-14					54.6186	10.8166	48.49	16.6419				7.00784	5.77526			6.36355	10.6384
		Vacc tetanus	85.0184	0	49.4047	0.329491					42.8523	1.13122	41.2602	18.2444			79.1582	0	51.6273	3.42509					47.753	3.90144	43.5483	17.9431				-6.89284	4.49866			11.4362	5.54564
		X-ray limb 1 image									195.757	75.0746	156.935	40.265					183.804	5.73231e-14					196.193	75.2416	163.292	41.3644								0.222469	4.05033
																									Median change							8.43683	5.26725	53.3074	12.4534	14.6826	6.17755	7.43157
																									Min							-33.7432	-43.7413	15.2572	3.68797	-0.637505	-14.4916	-1.4112
																									Max							71.6951	68.6314	93.5013	32.4424	49.1773	14.8978	19.4488

## Sheet: ST7
							240805
		Extraction time	I														V															Change in percent from I to V
			Anicura		Districts vet		Dyrenes venn		Empet		Evidensia		Independent		Vettris		Anicura		Districts vet		Dyrenes venn		Empet		Evidensia		Independent		Vettris			Anicura	Districts vet	Dyrenees venn	Empet	Evidensia	Independent	Vettris
	Species	Procedure	mean	(SD)	mean	(SD)	mean	(SD)	mean	(SD)	mean	(SD)	mean	(SD)	mean	(SD)	mean	(SD)	mean	(SD)	mean	(SD)	mean	(SD)	mean	(SD)	mean	(SD)	mean	(SD)
	Dog	Blood sample (CRP)	1507.6	624.639							1494.43	859.959	1253.87	530.389			1430.6	648.742	990	0					1505.71	749.778	1258.32	570.047				-0.0510746				0.00755186	0.00355168
		Caesarean section	32078.6	9781.58	29088.2	9317.44					25504.5	7131.04	20956.9	6775.25	25200	3898.72	34375	11126.3	25519.8	1049.18					32723.2	9647.15	22934.7	7588.46	25200	3898.72		0.0715855	-0.122674			0.283038	0.0943713	0
		Claw injury	5883	1632.82							4167.62	2424.62	3136.57	1131.03	3701.33	2296.86	5633.67	1327.89	3445	0					5071.93	2365.15	3287.1	1220.06	3641	1879.25		-0.042382				0.216983	0.0479941	-0.0163004
		Dental assess / scaling	3958.26	811.93	3177.85	17.3649	2623.75	696.68	3171.25	143.015	4053.29	1105.39	2891.62	898.506	3617.5	1048.01	4478.55	886.299	3340	0	3970	0	3515.83	130.486	4867.63	575.802	3064.16	1003.35	3970	747.508		0.131444	0.0510263	0.513101	0.108659	0.200908	0.0596703	0.097443
		Deworming cert	362.808	122.889	269.846	1.24035	145	14.1421	210	31.6228	372.34	123.594	240.809	72.6538	284.5	138.953	375.588	148.307	280	0	300	0	252.5	25.9808	410.603	113.798	269.621	108.516	294.5	78.0474		0.0352268	0.0376283	1.06897	0.202381	0.102765	0.119648	0.0351494
		EU passport	751.225	127.003	689.538	3.72104	678.571	26.7261	561.417	17.671	699.605	110.152	591.859	150.034	561.364	98.5416	896.75	156.047	720.339	2.60378	1050	0	766.667	54.4949	815.241	157.385	644.891	179.28	624.091	121.59		0.193717	0.0446683	0.547368	0.365593	0.165287	0.0896025	0.111741
		Euthanasia	1400.33	179.411	1379.23	6.20174	2108.33	146.656			1877.95	579.755	1500.35	530.511	1281.43	295.899	1678	126.615	1450	0	3480	0			2426.81	828.97	1614	614.695	1377.5	271.701		0.198286	0.0513107	0.650593		0.292262	0.0757525	0.0749721
		GDY bitch	5259.09	894.04	4346.15	31.0087	4900	0			4934.36	727.632	4150	887.748	4186.67	406.508	5838.78	1008.29	4568.64	9.9794					5389.3	638.739	4363.55	1024.57	4534	634.715		0.110226	0.051192	-1		0.0921989	0.0514586	0.0829618
		GDY male dog	8368.82	1153.71	7563.38	53.3349	8500	0			7900.96	1179.47	7176.96	1484.34	6754.9	1021.86	9029.64	1012.43	7950	0					8695.03	833.855	7553.86	1708.76	7399.91	893.494		0.0789628	0.0511167	-1		0.100503	0.0525153	0.0954873
		Ophthal exam cert	1037.17	241.404							1135.64	319.9	954.424	294.52	815	0	1193.75	280.587							1466.25	444.722	1073.05	355.47				0.150972				0.291126	0.124293	-1
		Otitis	1683.5	871.863							1946.14	557.02	1706.25	917.776			2998	2730.85	1830	0					2669.75	705.191	1785.17	859.219				0.780814				0.371816	0.0462515
		Pyometra	24019.4	5795.82	15424.5	1307.44					24844.3	9572.54	19271.5	6313.87	22000	3559.03	27851.5	7448.53	25325	0					34222.3	13797.2	20966.2	7101.79	22000	3559.03		0.159538	0.641868			0.37747	0.0879365	0
		Dental extraction	7781	0	8772.15	265.662					6311.43	3673.91	6214.68	3258.31			5144	3729.28	9250	0					7368.33	3240.99	5994.43	3119.84				-0.338902	0.0544731			0.167459	-0.0354399
		TPLO	49444.4	10736.7							49794.6	7728.08	44714.3	9340.13			52026	9588.85							50494.4	6524.69	50044.3	11167.1				0.0522112				0.0140536	0.119201
		Vacc distemperâ€¦	627.41	166.617	489.538	3.72104					532.043	91.6606	479.751	99.2913	464.545	53.7333	757.419	244.459	510	0	1090	0			676.42	230.403	502.248	108.118	490.455	63.382		0.207214	0.0417976			0.271365	0.0468932	0.055773
		X-ray hip dysplasia	2246.26	513.477	1669.08	7.44208	2006.12	124.097	2139.67	315.156	1985.23	452.007	1863.35	542.407	1718.57	134.217	2621.67	605.758	1750	0	3575	5.47723	3030	116.775	2381.04	690.433	2123.97	602.55	1900.62	243.859		0.167123	0.0484837	0.782042	0.416108	0.199377	0.13987	0.105933
	Cat	Abscess incl drain	5320.75	2109.55							4931.71	2915.59	3180.94	698.016			4533.33	1270.52	3595	0					7340.67	2815.19	3380.59	841.319				-0.14799				0.488461	0.0627656
		Blood sample large	2451.33	618.312	1875	0					3086.89	792.329	1832.38	735.454			2539.8	646.232	1432.5	625.79					3092.6	860.664	1900.13	704.359				0.0360892	-0.236			0.00185012	0.0369761
		Dental assess / scaling	3007.64	735.354	2119.69	12.4962	2418.12	372.999	2841.17	185.198	3153.64	861.173	2252.01	808.41	3120	767.984	3535.58	743.093	2230	0	2980	0	3164.17	229.246	3992.02	601.245	2407.53	865.289	3570	597.929		0.175535	0.0520395	0.23236	0.113686	0.265846	0.069062	0.144231
		Deworming cert	349.346	114.769	269.846	1.24035	145	14.1421	210	31.6228	372.34	123.594	244.038	70.7847	284.5	138.953	373.636	150.163	280	0	300	0	252.5	25.9808	412.966	113.961	265.83	100.55	294.5	78.0474		0.0695305	0.0376283	1.06897	0.202381	0.10911	0.0893004	0.0351494
		Euthanasia	1231.25	166.208	1379.23	6.20174	1076.88	65.4074			1314.45	386.31	1070.11	375.592	849.286	197.409	1424	181.73	1450	0	1990	0			1586.7	370.869	1199.99	498.116	935	207.519		0.156548	0.0513107	0.84794		0.20712	0.121374	0.100925
		GDY female	2546.7	1079.55	1410	0	2325	153.53	2266.33	127.801	1876.84	595.323	1713.87	578.258	1434	122.015	2929.67	1123.55	1480	0	3480	0	2716.67	124.633	2170.57	736.663	1942.18	647.504	1549.09	151.786		0.150378	0.0496454	0.496774	0.198706	0.156501	0.133212	0.0802587
		GDY male	1428.02	663.858	749.385	4.96139	1222.5	109.772	1203.83	275.399	1060.26	370.269	939.993	310.337	824.9	89.1072	1571.5	633.109	789.825	1.32453	1990	0	1470.83	44.8144	1235.68	448.637	1068.29	362.77	881.727	107.116		0.100478	0.0539642	0.627812	0.221791	0.165453	0.136484	0.0688899
		Patella exam with certificate	906	168.602							744.933	212.157	647.109	179.867	490	30.8221	1146	137.291							982.778	213.66	734.475	235.556	584	70.4805		0.264901				0.319283	0.135011	0.191837
		Senior check	2366	480.025							2050.57	744.757	1912.41	642.53	1628.14	176.916	3014.29	856.657							2328.33	497.058	2071.76	847.872	1739.33	178.442		0.274001				0.135456	0.0833217	0.0682928
		Dental extraction			6664.62	174.902					6400	2262.74	4360.22	2556.23	11000	0			5636.91	496.211					8771.67	2537.1	4230	2231.61	11000	0			-0.154203			0.370573	-0.029866	0
		Vacc calicivirus…	541.778	132.523	489.538	3.72104					501.971	71.2507	445.722	95.5637	435.455	57.2911	688.949	233.324	510	0	1090	0			651.648	228.91	475.44	107.762	452.273	66.1197		0.271644	0.0417976			0.298177	0.0666736	0.0386221
	Horse	Euthanasia			2858.36	13.4386					7166.33	2258.62	2854.76	404.071					4110	0					7166.33	2258.62	3032.48	612.386					0.437888			0	0.0622508
		GDY colt/stallion			4323.73	150.885					8040	1933.18	3613.88	512.65					5680	0					8490	1936.34	3829.61	862.541					0.31368			0.0559701	0.0596938
		Health cert TRACES			2870	0													2870	0							1234	0					0
		Health exam cert			2597.76	18.3254					3665	1376.18	2449.22	858.79					3860	0					4330	839.559	2818.74	779.504					0.485895			0.181446	0.15087
		Lameness exam initial			4875	1237.44					7097.5	6332.96	4205.35	2715.68					3474.5	34.8569					7520	5888.27	3589.66	2567.3					-0.287282			0.059528	-0.146407
		Oral exam treat	1728	0	1739.1	74.5234					2909	1064.86	1712.46	630.77			1720	0	2926.17	29.6929					3193	616.944	1938.15	757.543				-0.00462963	0.682571			0.0976281	0.131791
		Sedation	516	0	1051.06	62.0702							382.267	158.045			520	0	590	0							402.973	182.897				0.00775194	-0.438662				0.0541672
		Vacc influenza	797	137.179	549.552	3.66508					571.2	99.0818	487.514	171.434			890	0	580	0					606.2	120.051	538.18	184.704				0.116688	0.0554047			0.0612745	0.103928
		Vacc tetanus	894	0	549.552	3.66508					476.667	12.5831	458.957	202.941			890	0	573	38.0143					530	43.3013	483.333	199.147				-0.00447427	0.042667			0.111888	0.0531136
		X-ray limb 1 image									2177.5	835.09	1745.67	447.886					2040	0					2177.5	835.09	1814.11	461.745								0	0.0392082
																									Median change							0.113457	0.0503359	0.58759	0.202381	0.165453	0.0678678	0.0688899
																									Min							-0.338902	-0.438662	-1	0.108659	0	-0.146407	-1
																									Max							0.780814	0.682571	1.06897	0.416108	0.488461	0.15087	0.191837

## Sheet: ST8
		Species	Procedure	Category	Effect 1	Effect 2	Effect size	P-value	LSmean 1	BT 1	95% CI		LSmean 2	BT 2	95% CI
		Dog	Blood sample (CRP)	extraction date	2	4	0.05081	0.007	4.6657	106.24	91.4829	123.377	4.6149	100.978	86.9823	117.225
				extraction date	4	5	-0.04575	0.0108	4.6149	100.978	86.9823	117.225	4.6606	105.699	91.0586	122.694
				extraction date	4	6	-0.0599	0.0003	4.6149	100.978	86.9823	117.225	4.6748	107.211	92.3735	124.432
			Procedure	Category	Effect 1	Effect 2	Effect size	P-value	LSmean 1	BT 1	95% CI		LSmean 2	BT 2	95% CI
			Caesarean section	animal hospital	0	1	-0.2667	<.0001	7.3961	1629.62	1470.84	1805.53	7.6628	2127.71	1825.96	2479.32
				country	NO	SE	-0.6652	<.0001	7.1969	1335.28	1098.96	1622.44	7.862	2596.71	2418.9	2787.59
			Procedure	Category	Effect 1	Effect 2	Effect size	P-value	LSmean 1	BT 1	95% CI		LSmean 2	BT 2	95% CI
			Claw injury	extraction date	2	4	0.05658	<.0001	5.8328	341.313	309.396	376.522	5.7762	322.531	292.417	355.747
				extraction date	2	6	-0.02951	0.0296	5.8328	341.313	309.396	376.522	5.8623	351.532	318.853	387.559
				extraction date	3	4	0.04124	0.0005	5.8174	336.097	304.728	370.695	5.7762	322.531	292.417	355.747
				extraction date	3	6	-0.04485	<.0001	5.8174	336.097	304.728	370.695	5.8623	351.532	318.853	387.559
				extraction date	4	5	-0.03039	0.0145	5.7762	322.531	292.417	355.747	5.8066	332.487	301.579	366.562
				extraction date	4	6	-0.08609	<.0001	5.7762	322.531	292.417	355.747	5.8623	351.532	318.853	387.559
				extraction date	5	6	-0.0557	<.0001	5.8066	332.487	301.579	366.562	5.8623	351.532	318.853	387.559
				affiliation	Anicura	independent	0.4579	0.0062	6.0946	443.457	349.279	563.027	5.6367	280.535	254.976	308.657
				affiliation	Districts vet	independent	0.1857	0.0216	5.8224	337.782	299.764	380.621	5.6367	280.535	254.976	308.657
				hours worked Mon-Fri	Aless 35h	C45<=60h	-0.4118	0.0001	5.5628	260.551	220.29	308.171	5.9746	393.311	345.924	447.188
				hours worked Mon-Fri	Aless 35h	Dmore 60h	-0.4788	0.0091	5.5628	260.551	220.29	308.171	6.0416	420.565	328.856	537.85
				hours worked Mon-Fri	B35<=45h	C45<=60h	-0.2776	0.0007	5.697	297.972	270.416	328.337	5.9746	393.311	345.924	447.188
			Procedure	Category	Effect 1	Effect 2	Effect size	P-value	LSmean 1	BT 1	95% CI		LSmean 2	BT 2	95% CI
			Dental assess / scaling	hours worked Mon-Fri	Aless 35h	B35<=45h	-0.1317	0.0008	5.5629	260.577	238.415	284.8	5.6946	297.258	277.077	318.909
				hours worked Mon-Fri	Aless 35h	C45<=60h	-0.2608	<.0001	5.5629	260.577	238.415	284.8	5.8237	338.221	315.352	362.749
				hours worked Mon-Fri	Aless 35h	Dmore 60h	-0.3304	0.0051	5.5629	260.577	238.415	284.8	5.8933	362.6	302.808	434.199
				hours worked Mon-Fri	B35<=45h	C45<=60h	-0.129	<.0001	5.6946	297.258	277.077	318.909	5.8237	338.221	315.352	362.749
				animal hospital	0	1	-0.1625	0.0215	5.6624	287.839	268.271	308.834	5.8249	338.627	300.026	382.195
				country	NO	SE	-0.1494	<.0001	5.6689	289.716	267.959	313.239	5.8183	336.4	312.573	362.042
			Procedure	Category	Effect 1	Effect 2	Effect size	P-value	LSmean 1	BT 1	95% CI		LSmean 2	BT 2	95% CI
			Deworming cert	hours worked Mon-Fri	Aless 35h	C45<=60h	-0.1353	0.0397	3.0513	21.1428	19.3226	23.1344	3.1867	24.2084	22.7978	25.7063
				hours worked Mon-Fri	Aless 35h	Dmore 60h	-0.2674	0.0489	3.0513	21.1428	19.3226	23.1344	3.3187	27.6244	23.0209	33.1486
				country	NO	SE	-0.2496	<.0001	3.0483	21.0795	19.5991	22.6716	3.2979	27.0558	25.2763	28.9605
			Procedure	Category	Effect 1	Effect 2	Effect size	P-value	LSmean 1	BT 1	95% CI		LSmean 2	BT 2	95% CI
			EU passport	hours worked Mon-Fri	Aless 35h	B35<=45h	-0.08713	0.0053	4.0206	55.7345	52.7148	58.9272	4.1077	60.8067	58.538	63.1633
				hours worked Mon-Fri	Aless 35h	C45<=60h	-0.1307	<.0001	4.0206	55.7345	52.7148	58.9272	4.1512	63.5102	60.9396	66.1892
				hours worked Mon-Fri	Aless 35h	Dmore 60h	-0.1834	0.0045	4.0206	55.7345	52.7148	58.9272	4.204	66.9536	60.6333	73.9328
				country	NO	SE	0.08599	<.0001	4.1638	64.3155	61.3	67.4792	4.0779	59.0214	56.5526	61.5979
			Procedure	Category	Effect 1	Effect 2	Effect size	P-value	LSmean 1	BT 1	95% CI		LSmean 2	BT 2	95% CI
			Euthanasia	on-call	Open < 12 h/day Sat and/or Sun	Part of 24 h call all days	0.3616	0.0072	5.1715	176.179	158.84	195.411	4.8099	122.719	104.522	144.085
				on-call	Part of 24 h call all days	YNo on call	-0.3065	0.0194	4.8099	122.719	104.522	144.085	5.1164	166.734	156.166	178.018
				country	NO	SE	0.3679	<.0001	5.2049	182.163	168.427	197.019	4.837	126.091	118.613	134.039
			Procedure	Category	Effect 1	Effect 2	Effect size	P-value	LSmean 1	95% CI	95% CI		LSmean 2	BT 2	95% CI
			GDY bitch	hours worked Mon-Fri	Aless 35h	C45<=60h	-0.09724	0.0057	6.6069	740.185	701.249	781.283	6.7042	815.825	783.449	849.539
				hours worked Mon-Fri	Aless 35h	Dmore 60h	-0.1309	0.0176	6.6069	740.185	701.249	781.283	6.7379	843.787	783.056	909.228
				hours worked Mon-Fri	B35<=45h	C45<=60h	-0.07441	0.0003	6.6298	757.331	731.35	784.234	6.7042	815.825	783.449	849.539
				hours worked Mon-Fri	B35<=45h	Dmore 60h	-0.1081	0.0224	6.6298	757.331	731.35	784.234	6.7379	843.787	783.056	909.228
				country	NO	SE	0.2852	<.0001	6.8123	908.959	860.352	960.312	6.5271	683.413	664.368	703.004
			Procedure	Category	Effect 1	Effect 2	Effect size	P-value	LSmean 1	95% CI	95% CI		LSmean 2	BT 2	95% CI
			GDY male dog	hours worked Mon-Fri	Aless 35h	B35<=45h	-0.07889	0.0187	6.0522	425.047	398.472	453.394	6.1311	459.942	438.506	482.425
				hours worked Mon-Fri	Aless 35h	C45<=60h	-0.1233	0.0003	6.0522	425.047	398.472	453.394	6.1756	480.871	455.746	507.382
				hours worked Mon-Fri	Aless 35h	Dmore 60h	-0.2324	0.0005	6.0522	425.047	398.472	453.394	6.2846	536.25	486.505	591.081
				hours worked Mon-Fri	B35<=45h	Dmore 60h	-0.1535	0.0301	6.1311	459.942	438.506	482.425	6.2846	536.25	486.505	591.081
				on-call	24 h on call all days	Part of 24 h call all days	0.1916	0.0336	6.2257	505.577	464.759	549.98	6.0341	417.423	383.046	454.886
				on-call	Open < 12 h/day Sat and/or Sun	Part of 24 h call all days	0.1879	0.027	6.222	503.71	467.648	542.552	6.0341	417.423	383.046	454.886
				country	NO	SE	0.2648	<.0001	6.2933	540.935	505.775	578.54	6.0285	415.092	400.789	429.905
			Procedure	Category	Effect 1	Effect 2	Effect size	P-value	LSmean 1	BT 1	95% CI		LSmean 2	BT 2	95% CI
			Ophthal exam cert	country	NO	SE	0.5372	<.0001	4.9618	142.851	135.416	150.694	4.4246	83.4794	80.5209	86.5467
			Procedure	Category	Effect 1	Effect 2	Effect size	P-value	LSmean 1	BT 1	95% CI		LSmean 2	BT 2	95% CI
			Otitis	extraction date	2	4	0.05181	<.0001	5.032	153.239	133.439	175.978	4.9802	145.503	126.705	167.091
				extraction date	3	4	0.04118	<.0001	5.0213	151.608	132.029	174.091	4.9802	145.503	126.705	167.091
				extraction date	3	6	-0.02874	0.0106	5.0213	151.608	132.029	174.091	5.0501	156.038	135.895	179.167
				extraction date	4	5	-0.02747	0.0162	4.9802	145.503	126.705	167.091	5.0076	149.545	130.238	171.715
				extraction date	4	6	-0.06992	<.0001	4.9802	145.503	126.705	167.091	5.0501	156.038	135.895	179.167
				extraction date	5	6	-0.04245	<.0001	5.0076	149.545	130.238	171.715	5.0501	156.038	135.895	179.167
			Procedure	Category	Effect 1	Effect 2	Effect size	P-value	LSmean 1	BT 1	95% CI		LSmean 2	BT 2	95% CI
			Pyometra	animal hospital	0	1	-0.408	<.0001	7.3597	1571.37	1407.8	1753.93	7.7678	2363.27	2004.25	2786.6
				country	NO	SE	-0.3264	0.0007	7.4005	1636.8	1337.58	2002.96	7.727	2268.79	2092	2460.51
			Procedure	Category	Effect 1	Effect 2	Effect size	P-value	LSmean 1	BT 1	95% CI		LSmean 2	BT 2	95% CI
			Dental extraction	extraction date	2	4	0.05963	<.0001	6.3253	558.525	461.126	676.498	6.2656	526.157	434.411	637.28
				extraction date	2	5	0.03182	<.0001	6.3253	558.525	461.126	676.498	6.2935	541.044	446.701	655.311
				extraction date	3	4	0.04666	<.0001	6.3123	551.312	455.179	667.747	6.2656	526.157	434.411	637.28
				extraction date	3	5	0.01885	0.0068	6.3123	551.312	455.179	667.747	6.2935	541.044	446.701	655.311
				extraction date	3	6	-0.02066	0.0021	6.3123	551.312	455.179	667.747	6.333	562.843	464.699	681.714
				extraction date	4	5	-0.02781	<.0001	6.2656	526.157	434.411	637.28	6.2935	541.044	446.701	655.311
				extraction date	4	6	-0.06733	<.0001	6.2656	526.157	434.411	637.28	6.333	562.843	464.699	681.714
				extraction date	5	6	-0.03951	<.0001	6.2935	541.044	446.701	655.311	6.333	562.843	464.699	681.714
				hours worked Mon-Fri	Aless 35h	C45<=60h	-0.4628	0.0474	5.8457	345.744	266.249	448.975	6.3085	549.22	442.443	681.767
				hours worked Mon-Fri	Aless 35h	Dmore 60h	-1.1245	0.014	5.8457	345.744	266.249	448.975	6.9702	1064.44	546.752	2072.28
			Procedure	Category	Effect 1	Effect 2	Effect size	P-value	LSmean 1	BT 1	95% CI		LSmean 2	BT 2	95% CI
			TPLO
			Procedure	Category	Effect 1	Effect 2	Effect size	P-value	LSmean 1	BT 1	95% CI		LSmean 2	BT 2	95% CI
			Vacc - distemper…
				Category	Effect 1	Effect 2	Effect size	P-value	LSmean 1	BT 1	95% CI		LSmean 2	BT 2	95% CI
			Procedure
			X-ray hip dysplasia	hours worked Mon-Fri	Aless 35h	C45<=60h	-0.1049	0.0007	5.168	175.563	166.805	184.782	5.273	195	188.761	201.445
				country	NO	SE	0.4347	<.0001	5.4472	232.107	223.491	241.056	5.0125	150.28	144.971	155.783
		Cat	Procedure	Category	Effect 1	Effect 2	Effect size	P-value	LSmean 1	BT 1	95% CI		LSmean 2	BT 2	95% CI
			Abscess - incl drain	extraction date	3	6	-0.05348	0.0032	6.2335	509.536	393.227	660.246	6.287	537.538	414.838	696.531
				extraction date	4	6	-0.07326	<.0001	6.2137	499.546	385.518	647.301	6.287	537.538	414.838	696.531
				animal hospital	0	1	-0.7608	0.0002	5.8668	353.117	291.367	427.955	6.6276	755.666	500.108	1141.82
				country	NO	SE	0.4369	0.0282	6.4656	642.65	425.146	971.429	6.0287	415.175	342.666	503.026
			Procedure	Category	Effect 1	Effect 2	Effect size	P-value	LSmean 1	BT 1	95% CI		LSmean 2	BT 2	95% CI
			Blood sample large	extraction date	2	4	0.06378	<.0001	5.15	172.431	149.849	198.418	5.0862	161.774	140.642	186.081
				extraction date	3	4	0.05058	0.0007	5.1368	170.17	147.933	195.751	5.0862	161.774	140.642	186.081
				extraction date	4	6	-0.03646	0.0323	5.0862	161.774	140.642	186.081	5.1227	167.788	145.882	192.984
				affiliation	Anicura	Districts vet	0.6711	0.0487	5.3006	200.457	156.837	256.209	4.6295	102.463	66.4688	157.948
				affiliation	Districts vet	Evidensia	-0.825	0.0035	4.6295	102.463	66.4688	157.948	5.4544	233.785	193.462	282.511
				affiliation	Evidensia	independent	0.3473	0.0154	5.4544	233.785	193.462	282.511	5.1071	165.191	148.213	184.112
				country	NO	SE	-0.3237	0.0007	4.9611	142.751	118.232	172.355	5.2848	197.315	171.181	227.439
			Procedure	Category	Effect 1	Effect 2	Effect size	P-value	LSmean 1	BT 1	95% CI		LSmean 2	BT 2	95% CI
			Dental assess / scaling	hours worked Mon-Fri	Aless 35h	B35<=45h	-0.1409	0.0014	5.3179	203.955	188.306	220.905	5.4587	234.792	222.598	247.654
				hours worked Mon-Fri	Aless 35h	C45<=60h	-0.2696	<.0001	5.3179	203.955	188.306	220.905	5.5874	267.04	252.112	282.853
				hours worked Mon-Fri	Aless 35h	Dmore 60h	-0.4024	0.0035	5.3179	203.955	188.306	220.905	5.7203	304.996	244.643	380.239
				hours worked Mon-Fri	B35<=45h	C45<=60h	-0.1287	0.0005	5.4587	234.792	222.598	247.654	5.5874	267.04	252.112	282.853
				country	NO	SE	-0.1477	<.0001	5.4472	232.107	214.896	250.698	5.5949	269.051	249.96	289.599
			Procedure	Category	Effect 1	Effect 2	Effect size	P-value	LSmean 1	BT 1	95% CI		LSmean 2	BT 2	95% CI
			Deworming cert	hours worked Mon-Fri	Aless 35h	Dmore 60h	-0.2841	0.0202	3.0604	21.3361	19.4947	23.3514	3.3444	28.3436	23.8453	33.6904
				country	NO	SE	-0.2437	<.0001	3.0593	21.3126	19.8505	22.8824	3.303	27.1941	25.4499	29.0578
			Procedure	Category	Effect 1	Effect 2	Effect size	P-value	LSmean 1	BT 1	95% CI		LSmean 2	BT 2	95% CI
			Euthanasia	country	NO	SE	0.2048	<.0001	4.8177	123.68	114.146	134.011	4.6129	100.776	95.258	106.614
			Procedure	Category	Effect 1	Effect 2	Effect size	P-value	LSmean 1	BT 1	95% CI		LSmean 2	BT 2	95% CI
			GDY female	hours worked Mon-Fri	Aless 35h	B35<=45h	-0.06064	0.0189	5.1132	166.201	158.142	174.671	5.1739	176.602	169.977	183.486
				hours worked Mon-Fri	Aless 35h	C45<=60h	-0.1153	<.0001	5.1132	166.201	158.142	174.671	5.2285	186.513	179.41	193.897
				hours worked Mon-Fri	Aless 35h	Dmore 60h	-0.1534	0.0346	5.1132	166.201	158.142	174.671	5.2666	193.756	176.079	213.208
				hours worked Mon-Fri	B35<=45h	C45<=60h	-0.05465	0.0093	5.1739	176.602	169.977	183.486	5.2285	186.513	179.41	193.897
				on-call	Open < 12 h/day Sat and/or Sun	Part of 24 h call all days	0.119	0.0284	5.2613	192.732	182.547	203.485	5.1423	171.109	160.065	182.914
				country	NO	SE	0.5834	<.0001	5.4873	241.604	232.225	251.361	4.9039	134.815	129.744	140.083
			Procedure	Category	Effect 1	Effect 2	Effect size	P-value	LSmean 1	BT 1	95% CI		LSmean 2	BT 2	95% CI
			GDY male	hours worked Mon-Fri	Aless 35h	B35<=45h	-0.09306	0.0003	4.4836	88.5529	84.2143	93.115	4.5766	97.1834	93.8403	100.646
				hours worked Mon-Fri	Aless 35h	C45<=60h	-0.1467	<.0001	4.4836	88.5529	84.2143	93.115	4.6303	102.545	98.7073	106.532
				hours worked Mon-Fri	Aless 35h	Dmore 60h	-0.1611	0.0158	4.4836	88.5529	84.2143	93.115	4.6447	104.032	94.1526	114.948
				hours worked Mon-Fri	B35<=45h	C45<=60h	-0.05364	0.0307	4.5766	97.1834	93.8403	100.646	4.6303	102.545	98.7073	106.532
				country	NO	SE	0.5537	<.0001	4.8606	129.102	123.561	134.891	4.3069	74.2101	71.2316	77.3131
			Procedure	Category	Effect 1	Effect 2	Effect size	P-value	LSmean 1	BT 1	95% CI		LSmean 2	BT 2	95% CI
			Patella exam cert	country	NO	SE	0.3014	<.0001	4.4178	82.9137	71.4233	96.2526	4.1163	61.3319	56.2268	66.9005
			Procedure	Category	Effect 1	Effect 2	Effect size	P-value	LSmean 1	BT 1	95% CI		LSmean 2	BT 2	95% CI
			Senior check	country	NO	SE	0.4399	<.0001	5.5315	252.522	210.65	302.717	5.0916	162.65	146.306	180.819
			Procedure	Category	Effect 1	Effect 2	Effect size	P-value	LSmean 1	BT 1	95% CI		LSmean 2	BT 2	95% CI
			Dental extraction	animal hospital	0	1	-0.6483	0.034	5.6995	298.718	239.654	372.339	6.3478	571.235	314.622	1037.15
				country	NO	SE	-0.551	0.0161	5.7482	313.626	192.211	511.736	6.2992	544.136	404.976	731.116
			Procedure	Category	Effect 1	Effect 2	Effect size	P-value	LSmean 1	BT 1	95% CI		LSmean 2	BT 2	95% CI
			Vacc - calicivirus…
		Horse	Procedure	Category	Effect 1	Effect 2	Effect size	P-value	LSmean 1	BT 1	95% CI		LSmean 2	BT 2	95% CI
			Euthanasia	extraction date	4	6	-0.05434	0.0006	5.9317	376.795	326.543	434.779	5.9861	397.86	344.981	458.844
				affiliation	Evidensia	independent	0.7405	<.0001	6.3298	561.044	436.9	720.464	5.5892	267.522	239.154	299.254
			Procedure	Category	Effect 1	Effect 2	Effect size	P-value	LSmean 1	BT 1	95% CI		LSmean 2	BT 2	95% CI
			GDY colt/stallion	affiliation	Evidensia	independent	0.7834	<.0001	6.5732	715.656	579.694	883.508	5.7898	326.948	299.974	356.346
				extraction date	2	4	0.04127	0.0001	6.187	486.385	433.813	545.327	6.1457	466.706	416.286	523.233
				extraction date	2	6	-0.02858	0.0185	6.187	486.385	433.813	545.327	6.2155	500.446	446.434	560.993
				extraction date	3	4	0.04237	<.0001	6.1881	486.92	434.316	545.895	6.1457	466.706	416.286	523.233
				extraction date	3	6	-0.02748	0.0203	6.1881	486.92	434.316	545.895	6.2155	500.446	446.434	560.993
				extraction date	4	5	-0.02535	0.0379	6.1457	466.706	416.286	523.233	6.171	478.665	426.986	536.598
				extraction date	4	6	-0.06985	<.0001	6.1457	466.706	416.286	523.233	6.2155	500.446	446.434	560.993
				extraction date	5	6	-0.04449	<.0001	6.171	478.665	426.986	536.598	6.2155	500.446	446.434	560.993
			Procedure	Category	Effect 1	Effect 2	Effect size	P-value	LSmean 1	BT 1	95% CI		LSmean 2	BT 2	95% CI
			Health exam cert	extraction date	2	6	-0.07759	0.0047	5.5075	246.534	202.019	300.857	5.5851	266.427	218.406	325.006
				extraction date	3	6	-0.06363	0.0211	5.5215	250.01	204.948	304.979	5.5851	266.427	218.406	325.006
				extraction date	4	6	-0.08175	0.0008	5.5033	245.501	201.291	299.42	5.5851	266.427	218.406	325.006
				affiliation	Evidensia	independent	0.386	0.0042	5.7226	305.699	230.661	405.148	5.3366	207.805	173.681	248.633
				hours worked Mon-Fri	Aless 35h	B35<=45h	-0.507	0.0025	5.1512	172.639	132.45	225.021	5.6583	286.661	245.892	334.19
			Procedure	Category	Effect 1	Effect 2	Effect size	P-value	LSmean 1	BT 1	95% CI		LSmean 2	BT 2	95% CI
			Lameness exam
			Procedure	Category	Effect 1	Effect 2	Effect size	P-value	LSmean 1	BT 1	95% CI		LSmean 2	BT 2	95% CI
			Oral exam treat	affiliationTetOsSed	Evidensia	independent	0.5456	0.0015	5.5774	264.383	199.722	349.98	5.0318	153.209	137.754	170.397
			Procedure	Category	Effect 1	Effect 2	Effect size	P-value	LSmean 1	BT 1	95% CI		LSmean 2	BT 2	95% CI
			Sedation	extraction date	2	4	0.06077	<.0001	3.4994	33.0956	29.2265	37.4768	3.4387	31.1464	27.5096	35.2641
				extraction date	2	5	0.02875	0.0386	3.4994	33.0956	29.2265	37.4768	3.4707	32.1592	28.4052	36.4094
				extraction date	3	4	0.04438	<.0001	3.483	32.5572	28.7528	36.8651	3.4387	31.1464	27.5096	35.2641
				extraction date	4	5	-0.03202	0.0078	3.4387	31.1464	27.5096	35.2641	3.4707	32.1592	28.4052	36.4094
				extraction date	4	6	-0.06845	<.0001	3.4387	31.1464	27.5096	35.2641	3.5071	33.3514	29.4588	37.7584
				extraction date	5	6	-0.03643	0.0012	3.4707	32.1592	28.4052	36.4094	3.5071	33.3514	29.4588	37.7584
			Procedure	Category	Effect 1	Effect 2	Effect size	P-value	LSmean 1	BT 1	95% CI		LSmean 2	BT 2	95% CI
			Vacc - influenza	extraction date	2	6	-0.06786	<.0001	3.9754	53.2714	44.9551	63.1262	4.0433	57.0142	48.1164	67.5574
				extraction date	3	4	0.04331	0.0003	4.0002	54.6091	46.0884	64.705	3.9569	52.295	44.1354	61.963
				extraction date	3	6	-0.04312	0.0004	4.0002	54.6091	46.0884	64.705	4.0433	57.0142	48.1164	67.5574
				extraction date	4	5	-0.03603	0.0041	3.9569	52.295	44.1354	61.963	3.9929	54.2119	45.7523	64.2356
				extraction date	4	6	-0.08642	<.0001	3.9569	52.295	44.1354	61.963	4.0433	57.0142	48.1164	67.5574
				extraction date	5	6	-0.05039	<.0001	3.9929	54.2119	45.7523	64.2356	4.0433	57.0142	48.1164	67.5574
			Procedure	Category	Effect 1	Effect 2	Effect size	P-value	LSmean 1	BT 1	95% CI		LSmean 2	BT 2	95% CI
			Vacc - tetanus	extraction date	2	6	-0.05325	<.0001	3.6757	39.4763	34.9324	44.6112	3.729	41.6374	36.8506	47.0461
				extraction date	3	4	0.03893	0.0088	3.6902	40.0529	35.4399	45.2663	3.6513	38.5247	34.0911	43.535
				extraction date	3	6	-0.03879	0.0087	3.6902	40.0529	35.4399	45.2663	3.729	41.6374	36.8506	47.0461
				extraction date	4	5	-0.03151	0.0464	3.6513	38.5247	34.0911	43.535	3.6828	39.7576	35.1882	44.9202
				extraction date	4	6	-0.07772	<.0001	3.6513	38.5247	34.0911	43.535	3.729	41.6374	36.8506	47.0461
				extraction date	5	6	-0.04621	0.0003	3.6828	39.7576	35.1882	44.9202	3.729	41.6374	36.8506	47.0461
			Procedure	Category	Effect 1	Effect 2	Effect size	P-value	LSmean 1	BT 1	95% CI		LSmean 2	BT 2	95% CI
			X-ray limb 1 image	extraction date	2	3	0.02001	0.0211	5.0959	163.351	145.975	182.795	5.0759	160.116	143.084	179.175
				extraction date	2	4	0.06419	<.0001	5.0959	163.351	145.975	182.795	5.0317	153.193	136.906	171.418
				extraction date	2	5	0.03289	<.0001	5.0959	163.351	145.975	182.795	5.063	158.064	141.259	176.868
				extraction date	3	4	0.04419	<.0001	5.0759	160.116	143.084	179.175	5.0317	153.193	136.906	171.418
				extraction date	3	6	-0.02208	0.0047	5.0759	160.116	143.084	179.175	5.098	163.694	146.29	183.168
				extraction date	4	5	-0.0313	<.0001	5.0317	153.193	136.906	171.418	5.063	158.064	141.259	176.868
				extraction date	4	6	-0.06627	<.0001	5.0317	153.193	136.906	171.418	5.098	163.694	146.29	183.168
				extraction date	5	6	-0.03497	<.0001	5.063	158.064	141.259	176.868	5.098	163.694	146.29	183.168

## Sheet: ST9
																						Here starts the coding to calculate the number of statistical significances in a more combined format, resulting in Table 10.
	Number	Procedure	Comparison	Effect estimate	P-value	Lsmean Eff 1	Back Trans 1	95% CI		LSmean Eff 2	Back Trans 2	95% CI		lastExtr6	firstExtr2	1of2extract	2of2extract	Sec2First1	Percchange	PercchangePOS	PerccghangeNEG	An > Dv	An > Dy	An > Em	An > Ev	An > No	An > Vt	Dv > Dy	Dv > Em	Dv > Ev	Dv > No	Dv > Vt	Dy > Em	Dy > Ev	Dy > No	Dy > Vt	Em > Ev	Em > No	Em > Vt	Ev > No	Ev > Vt	No > Vt	An < Dv	An < Dy	An < Em	An < Ev	An < No	An < Vt	Dv < Dy
	8	GDY bitch	k=An vs k=No, extraction_date=2	-0.156	<.0001	6.7318	838.655	792.657	887.323	6.5758	717.519	694.972	740.798	0	0	1	0	1	-0.144441							-0.144441
	8		k=An vs k=No, extraction_date=3	-0.137	0.0002	6.7139	823.777	778.595	871.581	6.5768	718.237	695.695	741.51	0	0	1	0	1	-0.128117							-0.128117
	8		k=An vs k=No, extraction_date=4	-0.1561	<.0001	6.6906	804.805	760.44	851.758	6.5345	688.489	666.867	710.813	0	0	1	0	1	-0.144526							-0.144526
	8		k=An vs k=No, extraction_date=5	-0.1461	<.0001	6.7154	825.014	779.535	873.146	6.5693	712.871	690.496	735.97	0	0	1	0	1	-0.135929							-0.135929
	8		k=An vs k=No, extraction_date=6	-0.219	<.0001	6.827	922.419	871.571	976.234	6.608	741	717.757	764.995	1	0	1	0	1	-0.196678							-0.196678
	8		k=Dv vs k=No, extraction_date=2	-0.1304	<.0001	6.7062	817.458	779.33	857.452	6.5758	717.519	694.972	740.798	0	0	1	0	1	-0.122256												-0.122256
	8		k=Dv vs k=No, extraction_date=3	-0.1638	<.0001	6.7406	846.068	806.527	887.549	6.5768	718.237	695.695	741.51	0	0	1	0	1	-0.151088												-0.151088
	8		k=Dv vs k=No, extraction_date=4	-0.1602	<.0001	6.6947	808.111	770.344	847.731	6.5345	688.489	666.867	710.813	0	0	1	0	1	-0.148027												-0.148027
	8		k=Dv vs k=No, extraction_date=5	-0.1505	<.0001	6.7198	828.652	789.475	869.772	6.5693	712.871	690.496	735.97	0	0	1	0	1	-0.139722												-0.139722
	8		k=Dv vs k=No, extraction_date=6	-0.1502	<.0001	6.7583	861.177	820.463	903.912	6.608	741	717.757	764.995	1	0	1	0	1	-0.13955												-0.13955
	8		k=Ev vs k=No, extraction_date=2	-0.1189	<.0001	6.6947	808.111	773.946	843.786	6.5758	717.519	694.972	740.798	0	0	1	0	1	-0.112103																					-0.112103
	8		k=Ev vs k=No, extraction_date=3	-0.1281	<.0001	6.705	816.478	781.958	852.521	6.5768	718.237	695.695	741.51	0	0	1	0	1	-0.120323																					-0.120323
	8		k=Ev vs k=No, extraction_date=4	-0.1347	<.0001	6.6692	787.765	754.43	822.573	6.5345	688.489	666.867	710.813	0	0	1	0	1	-0.126022																					-0.126022
	8		k=Ev vs k=No, extraction_date=5	-0.144	<.0001	6.7134	823.365	788.477	859.797	6.5693	712.871	690.496	735.97	0	0	1	0	1	-0.134199																					-0.134199
	8		k=Ev vs k=No, extraction_date=6	-0.1821	<.0001	6.7901	889.002	851.4	928.266	6.608	741	717.757	764.995	1	0	1	0	1	-0.166482																					-0.166482
	8		k=An, extraction_date=2 vs extraction_date=4	-0.04121	0.0107	6.7318	838.655	792.657	887.323	6.6906	804.805	760.44	851.758	0	1	1	1	2	-0.0403628		-0.0403628
	8		k=An, extraction_date=2 vs extraction_date=6	0.09524	<.0001	6.7318	838.655	792.657	887.323	6.827	922.419	871.571	976.234	1	1	1	1	2	0.0998788	0.0998788
	8		k=An, extraction_date=3 vs extraction_date=6	0.1132	<.0001	6.7139	823.777	778.595	871.581	6.827	922.419	871.571	976.234	1	0	1	1	1	0.119744
	8		k=An, extraction_date=4 vs extraction_date=6	0.1365	<.0001	6.6906	804.805	760.44	851.758	6.827	922.419	871.571	976.234	1	0	1	1	1	0.14614
	8		k=An, extraction_date=5 vs extraction_date=6	0.1116	<.0001	6.7154	825.014	779.535	873.146	6.827	922.419	871.571	976.234	1	0	1	1	1	0.118066
	8		k=Dv, extraction_date=2 vs extraction_date=3	0.03444	0.0002	6.7062	817.458	779.33	857.452	6.7406	846.068	806.527	887.549	0	1	1	1	2	0.0349985	0.0349985
	8		k=Dv, extraction_date=2 vs extraction_date=6	0.0521	<.0001	6.7062	817.458	779.33	857.452	6.7583	861.177	820.463	903.912	1	1	1	1	2	0.0534811	0.0534811
	8		k=Dv, extraction_date=3 vs extraction_date=4	-0.04587	<.0001	6.7406	846.068	806.527	887.549	6.6947	808.111	770.344	847.731	0	0	1	1	1	-0.0448625
	8		k=Dv, extraction_date=4 vs extraction_date=6	0.06354	<.0001	6.6947	808.111	770.344	847.731	6.7583	861.177	820.463	903.912	1	0	1	1	1	0.065666
	8		k=Dv, extraction_date=5 vs extraction_date=6	0.03847	0.0007	6.7198	828.652	789.475	869.772	6.7583	861.177	820.463	903.912	1	0	1	1	1	0.0392507
	8		k=Ev, extraction_date=2 vs extraction_date=6	0.09546	<.0001	6.6947	808.111	773.946	843.786	6.7901	889.002	851.4	928.266	1	1	1	1	2	0.100099	0.100099
	8		k=Ev, extraction_date=3 vs extraction_date=4	-0.03574	<.0001	6.705	816.478	781.958	852.521	6.6692	787.765	754.43	822.573	0	0	1	1	1	-0.0351668
	8		k=Ev, extraction_date=3 vs extraction_date=6	0.08517	<.0001	6.705	816.478	781.958	852.521	6.7901	889.002	851.4	928.266	1	0	1	1	1	0.0888259
	8		k=Ev, extraction_date=4 vs extraction_date=5	0.04415	<.0001	6.6692	787.765	754.43	822.573	6.7134	823.365	788.477	859.797	0	0	1	1	1	0.0451914
	8		k=Ev, extraction_date=4 vs extraction_date=6	0.1209	<.0001	6.6692	787.765	754.43	822.573	6.7901	889.002	851.4	928.266	1	0	1	1	1	0.128512
	8		k=Ev, extraction_date=5 vs extraction_date=6	0.07675	<.0001	6.7134	823.365	788.477	859.797	6.7901	889.002	851.4	928.266	1	0	1	1	1	0.0797181
	8		k=No, extraction_date=2 vs extraction_date=4	-0.04126	<.0001	6.5758	717.519	694.972	740.798	6.5345	688.489	666.867	710.813	0	1	1	1	2	-0.0404588		-0.0404588
	8		k=No, extraction_date=2 vs extraction_date=6	0.03226	<.0001	6.5758	717.519	694.972	740.798	6.608	741	717.757	764.995	1	1	1	1	2	0.032724	0.032724
	8		k=No, extraction_date=3 vs extraction_date=4	-0.04231	<.0001	6.5768	718.237	695.695	741.51	6.5345	688.489	666.867	710.813	0	0	1	1	1	-0.0414178
	8		k=No, extraction_date=3 vs extraction_date=6	0.0312	<.0001	6.5768	718.237	695.695	741.51	6.608	741	717.757	764.995	1	0	1	1	1	0.0316918
	8		k=No, extraction_date=4 vs extraction_date=5	0.03482	<.0001	6.5345	688.489	666.867	710.813	6.5693	712.871	690.496	735.97	0	0	1	1	1	0.0354126
	8		k=No, extraction_date=4 vs extraction_date=6	0.07352	<.0001	6.5345	688.489	666.867	710.813	6.608	741	717.757	764.995	1	0	1	1	1	0.0762685
	8		k=No, extraction_date=5 vs extraction_date=6	0.0387	<.0001	6.5693	712.871	690.496	735.97	6.608	741	717.757	764.995	1	0	1	1	1	0.0394586
	8		k=Vt, extraction_date=2 vs extraction_date=6	0.09913	<.0001	6.5727	715.299	651.8	784.984	6.6718	789.816	719.321	867.219	1	1	1	1	2	0.104177	0.104177
	8		k=Vt, extraction_date=3 vs extraction_date=6	0.06963	0.0207	6.6022	736.714	671.314	808.486	6.6718	789.816	719.321	867.219	1	0	1	1	1	0.0720793
	8		k=Vt, extraction_date=4 vs extraction_date=6	0.1123	<.0001	6.5595	705.919	642.912	775.1	6.6718	789.816	719.321	867.219	1	0	1	1	1	0.118848
	8		k=Vt, extraction_date=5 vs extraction_date=6	0.07095	0.019	6.6009	735.757	670.087	807.863	6.6718	789.816	719.321	867.219	1	0	1	1	1	0.0734739
	22		Comparison	Effect size	P-value	LSmean 1	BT 1	95% CI		LSmean 2	BT 2	95% CI		lastExtr6	firstExtr2	1of2extract	2of2extract	Sec2First1	Percchange	PercchangePOS	PerccghangeNEG	An > Dv	An > Dy	An > Em	An > Ev	An > No	An > Vt	Dv > Dy	Dv > Em	Dv > Ev	Dv > No	Dv > Vt	Dy > Em	Dy > Ev	Dy > No	Dy > Vt	Em > Ev	Em > No	Em > Vt	Ev > No	Ev > Vt	No > Vt	An < Dv	An < Dy	An < Em	An < Ev	An < No	An < Vt	Dv < Dy
	22	GDY female	k=An vs k=Dy, extraction_date=2	-0.2721	0.0079	5.3875	218.656	208.265	229.565	5.1154	166.567	147.005	188.732	0	0	1	0	1	-0.238222				-0.238222
	22		k=An vs k=Em, extraction_date=2	-0.3712	<.0001	5.3875	218.656	208.265	229.565	5.0163	150.852	135.779	167.599	0	0	1	0	1	-0.310094					-0.310094
	22		k=An vs k=Ev, extraction_date=2	-0.1556	<.0001	5.3875	218.656	208.265	229.565	5.2319	187.148	179.552	195.065	0	0	1	0	1	-0.144099						-0.144099
	22		k=An vs k=No, extraction_date=2	-0.2621	<.0001	5.3875	218.656	208.265	229.565	5.1253	168.225	163.028	173.587	0	0	1	0	1	-0.230643							-0.230643
	22		k=An vs k=Vt, extraction_date=2	-0.2203	0.0319	5.3875	218.656	208.265	229.565	5.1671	175.405	157.406	195.463	0	0	1	0	1	-0.197802								-0.197802
	22		k=An vs k=Dy, extraction_date=3	-0.2962	0.002	5.3498	210.566	200.568	221.063	5.0536	156.585	137.976	177.704	0	0	1	0	1	-0.256361				-0.256361
	22		k=An vs k=Em, extraction_date=3	-0.3985	<.0001	5.3498	210.566	200.568	221.063	4.9512	141.344	127.221	157.035	0	0	1	0	1	-0.328741					-0.328741
	22		k=An vs k=Ev, extraction_date=3	-0.1242	0.0033	5.3498	210.566	200.568	221.063	5.2256	185.973	178.418	193.848	0	0	1	0	1	-0.116797						-0.116797
	22		k=An vs k=No, extraction_date=3	-0.2185	<.0001	5.3498	210.566	200.568	221.063	5.1313	169.237	164.041	174.598	0	0	1	0	1	-0.196277							-0.196277
	22		k=An vs k=Dy, extraction_date=4	-0.3492	<.0001	5.3601	212.746	202.593	223.409	5.0109	150.04	132.209	170.276	0	0	1	0	1	-0.294748				-0.294748
	22		k=An vs k=Em, extraction_date=4	-0.451	<.0001	5.3601	212.746	202.593	223.409	4.9091	135.517	121.976	150.561	0	0	1	0	1	-0.363009					-0.363009
	22		k=An vs k=Ev, extraction_date=4	-0.1771	<.0001	5.3601	212.746	202.593	223.409	5.183	178.217	170.97	185.771	0	0	1	0	1	-0.162304						-0.162304
	22		k=An vs k=No, extraction_date=4	-0.2685	<.0001	5.3601	212.746	202.593	223.409	5.0916	162.65	157.656	167.802	0	0	1	0	1	-0.235475							-0.235475
	22		k=An vs k=Vt, extraction_date=4	-0.2236	0.0239	5.3601	212.746	202.593	223.409	5.1365	170.119	152.755	189.457	0	0	1	0	1	-0.200365								-0.200365
	22		k=An vs k=Dv, extraction_date=5	-0.1849	0.031	5.4126	224.214	213.513	235.451	5.2277	186.364	172.253	201.63	0	0	1	0	1	-0.168813			-0.168813
	22		k=An vs k=Dy, extraction_date=5	-0.3242	0.0003	5.4126	224.214	213.513	235.451	5.0885	162.146	142.877	184.015	0	0	1	0	1	-0.276822				-0.276822
	22		k=An vs k=Em, extraction_date=5	-0.2474	0.002	5.4126	224.214	213.513	235.451	5.1652	175.072	157.579	194.508	0	0	1	0	1	-0.219172					-0.219172
	22		k=An vs k=Ev, extraction_date=5	-0.1313	0.0011	5.4126	224.214	213.513	235.451	5.2813	196.625	188.637	204.952	0	0	1	0	1	-0.123045						-0.123045
	22		k=An vs k=No, extraction_date=5	-0.267	<.0001	5.4126	224.214	213.513	235.451	5.1456	171.674	166.407	177.109	0	0	1	0	1	-0.234327							-0.234327
	22		k=An vs k=Vt, extraction_date=5	-0.2451	0.005	5.4126	224.214	213.513	235.451	5.1675	175.476	157.565	195.422	0	0	1	0	1	-0.217374								-0.217374
	22		k=An vs k=Dv, extraction_date=6	-0.2092	0.0038	5.4754	238.746	227.369	250.692	5.2662	193.679	179.014	209.544	1	0	1	0	1	-0.188767			-0.188767
	22		k=An vs k=Em, extraction_date=6	-0.3444	<.0001	5.4754	238.746	227.369	250.692	5.131	169.186	152.281	187.968	1	0	1	0	1	-0.291355					-0.291355
	22		k=An vs k=Ev, extraction_date=6	-0.115	0.0135	5.4754	238.746	227.369	250.692	5.3604	212.81	204.177	221.809	1	0	1	0	1	-0.108634						-0.108634
	22		k=An vs k=No, extraction_date=6	-0.3077	<.0001	5.4754	238.746	227.369	250.692	5.1677	175.511	170.129	181.063	1	0	1	0	1	-0.264864							-0.264864
	22		k=An vs k=Vt, extraction_date=6	-0.2466	0.0044	5.4754	238.746	227.369	250.692	5.2288	186.569	167.526	207.776	1	0	1	0	1	-0.218547								-0.218547
	22		k=Dv vs k=Em, extraction_date=3	-0.2971	0.0055	5.2483	190.243	175.883	205.774	4.9512	141.344	127.221	157.035	0	0	1	0	1	-0.25703										-0.25703
	22		k=Dv vs k=Em, extraction_date=4	-0.2934	0.007	5.2025	181.726	168.01	196.562	4.9091	135.517	121.976	150.561	0	0	1	0	1	-0.254276										-0.254276
	22		k=Dy vs k=Em, extraction_date=6	-0.3022	0.0445	5.4333	228.903	201.428	260.127	5.131	169.186	152.281	187.968	1	0	1	0	1	-0.260884														-0.260884
	22		k=Dy vs k=No, extraction_date=6	-0.2656	0.009	5.4333	228.903	201.428	260.127	5.1677	175.511	170.129	181.063	1	0	1	0	1	-0.233254																-0.233254
	22		k=Em vs k=Ev, extraction_date=2	0.2156	0.0214	5.0163	150.852	135.779	167.599	5.2319	187.148	179.552	195.065	0	0	1	0	1	0.240606
	22		k=Em vs k=Ev, extraction_date=3	0.2743	0.0002	4.9512	141.344	127.221	157.035	5.2256	185.973	178.418	193.848	0	0	1	0	1	0.315741
	22		k=Em vs k=Ev, extraction_date=4	0.2739	0.0002	4.9091	135.517	121.976	150.561	5.183	178.217	170.97	185.771	0	0	1	0	1	0.315083
	22		k=Em vs k=Ev, extraction_date=6	0.2293	0.0076	5.131	169.186	152.281	187.968	5.3604	212.81	204.177	221.809	1	0	1	0	1	0.257845
	22		k=Ev vs k=No, extraction_date=2	-0.1065	0.0002	5.2319	187.148	179.552	195.065	5.1253	168.225	163.028	173.587	0	0	1	0	1	-0.101115																					-0.101115
	22		k=Ev vs k=No, extraction_date=3	-0.09427	0.0023	5.2256	185.973	178.418	193.848	5.1313	169.237	164.041	174.598	0	0	1	0	1	-0.0899903																					-0.0899903
	22		k=Ev vs k=No, extraction_date=4	-0.09146	0.0043	5.183	178.217	170.97	185.771	5.0916	162.65	157.656	167.802	0	0	1	0	1	-0.0873474																					-0.0873474
	22		k=Ev vs k=No, extraction_date=5	-0.1357	<.0001	5.2813	196.625	188.637	204.952	5.1456	171.674	166.407	177.109	0	0	1	0	1	-0.126895																					-0.126895
	22		k=Ev vs k=No, extraction_date=6	-0.1927	<.0001	5.3604	212.81	204.177	221.809	5.1677	175.511	170.129	181.063	1	0	1	0	1	-0.175271																					-0.175271
	22		k=An, extraction_date=2 vs extraction_date=3	-0.03768	0.0245	5.3875	218.656	208.265	229.565	5.3498	210.566	200.568	221.063	0	1	1	1	2	-0.0369982		-0.0369982
	22		k=An, extraction_date=2 vs extraction_date=6	0.08794	<.0001	5.3875	218.656	208.265	229.565	5.4754	238.746	227.369	250.692	1	1	1	1	2	0.0918789	0.0918789
	22		k=An, extraction_date=3 vs extraction_date=5	0.06283	<.0001	5.3498	210.566	200.568	221.063	5.4126	224.214	213.513	235.451	0	0	1	1	1	0.0648139
	22		k=An, extraction_date=3 vs extraction_date=6	0.1256	<.0001	5.3498	210.566	200.568	221.063	5.4754	238.746	227.369	250.692	1	0	1	1	1	0.133829
	22		k=An, extraction_date=4 vs extraction_date=5	0.05254	<.0001	5.3601	212.746	202.593	223.409	5.4126	224.214	213.513	235.451	0	0	1	1	1	0.0539026
	22		k=An, extraction_date=4 vs extraction_date=6	0.1153	<.0001	5.3601	212.746	202.593	223.409	5.4754	238.746	227.369	250.692	1	0	1	1	1	0.12221
	22		k=An, extraction_date=5 vs extraction_date=6	0.06279	<.0001	5.4126	224.214	213.513	235.451	5.4754	238.746	227.369	250.692	1	0	1	1	1	0.0648139
	22		k=Dv, extraction_date=2 vs extraction_date=6	0.05064	0.0002	5.2155	184.104	170.218	199.122	5.2662	193.679	179.014	209.544	1	1	1	1	2	0.0520072	0.0520072
	22		k=Dv, extraction_date=3 vs extraction_date=4	-0.04586	0.0006	5.2483	190.243	175.883	205.774	5.2025	181.726	168.01	196.562	0	0	1	1	1	-0.044767
	22		k=Dv, extraction_date=4 vs extraction_date=6	0.06367	<.0001	5.2025	181.726	168.01	196.562	5.2662	193.679	179.014	209.544	1	0	1	1	1	0.0657726
	22		k=Dy, extraction_date=2 vs extraction_date=6	0.3179	<.0001	5.1154	166.567	147.005	188.732	5.4333	228.903	201.428	260.127	1	1	1	1	2	0.374239	0.374239
	22		k=Dy, extraction_date=3 vs extraction_date=6	0.3796	<.0001	5.0536	156.585	137.976	177.704	5.4333	228.903	201.428	260.127	1	0	1	1	1	0.461846
	22		k=Dy, extraction_date=4 vs extraction_date=6	0.4224	<.0001	5.0109	150.04	132.209	170.276	5.4333	228.903	201.428	260.127	1	0	1	1	1	0.525619
	22		k=Dy, extraction_date=5 vs extraction_date=6	0.3448	<.0001	5.0885	162.146	142.877	184.015	5.4333	228.903	201.428	260.127	1	0	1	1	1	0.411708
	22		k=Em, extraction_date=2 vs extraction_date=4	-0.1072	0.0004	5.0163	150.852	135.779	167.599	4.9091	135.517	121.976	150.561	0	1	1	1	2	-0.101654		-0.101654
	22		k=Em, extraction_date=2 vs extraction_date=5	0.149	<.0001	5.0163	150.852	135.779	167.599	5.1652	175.072	157.579	194.508	0	1	1	1	2	0.160557	0.160557
	22		k=Em, extraction_date=2 vs extraction_date=6	0.1148	<.0001	5.0163	150.852	135.779	167.599	5.131	169.186	152.281	187.968	1	1	1	1	2	0.121537	0.121537
	22		k=Em, extraction_date=3 vs extraction_date=5	0.214	<.0001	4.9512	141.344	127.221	157.035	5.1652	175.072	157.579	194.508	0	0	1	1	1	0.238623
	22		k=Em, extraction_date=3 vs extraction_date=6	0.1798	<.0001	4.9512	141.344	127.221	157.035	5.131	169.186	152.281	187.968	1	0	1	1	1	0.196978
	22		k=Em, extraction_date=4 vs extraction_date=5	0.2561	<.0001	4.9091	135.517	121.976	150.561	5.1652	175.072	157.579	194.508	0	0	1	1	1	0.291882
	22		k=Em, extraction_date=4 vs extraction_date=6	0.2219	<.0001	4.9091	135.517	121.976	150.561	5.131	169.186	152.281	187.968	1	0	1	1	1	0.248447
	22		k=Ev, extraction_date=2 vs extraction_date=4	-0.04884	<.0001	5.2319	187.148	179.552	195.065	5.183	178.217	170.97	185.771	0	1	1	1	2	-0.0477236		-0.0477236
	22		k=Ev, extraction_date=2 vs extraction_date=5	0.04942	<.0001	5.2319	187.148	179.552	195.065	5.2813	196.625	188.637	204.952	0	1	1	1	2	0.0506405	0.0506405
	22		k=Ev, extraction_date=2 vs extraction_date=6	0.1285	<.0001	5.2319	187.148	179.552	195.065	5.3604	212.81	204.177	221.809	1	1	1	1	2	0.137121	0.137121
	22		k=Ev, extraction_date=3 vs extraction_date=4	-0.04256	<.0001	5.2256	185.973	178.418	193.848	5.183	178.217	170.97	185.771	0	0	1	1	1	-0.0417054
	22		k=Ev, extraction_date=3 vs extraction_date=5	0.0557	<.0001	5.2256	185.973	178.418	193.848	5.2813	196.625	188.637	204.952	0	0	1	1	1	0.0572805
	22		k=Ev, extraction_date=3 vs extraction_date=6	0.1348	<.0001	5.2256	185.973	178.418	193.848	5.3604	212.81	204.177	221.809	1	0	1	1	1	0.144308
	22		k=Ev, extraction_date=4 vs extraction_date=5	0.09825	<.0001	5.183	178.217	170.97	185.771	5.2813	196.625	188.637	204.952	0	0	1	1	1	0.103294
	22		k=Ev, extraction_date=4 vs extraction_date=6	0.1774	<.0001	5.183	178.217	170.97	185.771	5.3604	212.81	204.177	221.809	1	0	1	1	1	0.194109
	22		k=Ev, extraction_date=5 vs extraction_date=6	0.07911	<.0001	5.2813	196.625	188.637	204.952	5.3604	212.81	204.177	221.809	1	0	1	1	1	0.0823125
	22		k=No, extraction_date=2 vs extraction_date=4	-0.03377	<.0001	5.1253	168.225	163.028	173.587	5.0916	162.65	157.656	167.802	0	1	1	1	2	-0.0331385		-0.0331385
	22		k=No, extraction_date=2 vs extraction_date=5	0.02026	0.0032	5.1253	168.225	163.028	173.587	5.1456	171.674	166.407	177.109	0	1	1	1	2	0.0205074	0.0205074
	22		k=No, extraction_date=2 vs extraction_date=6	0.04233	<.0001	5.1253	168.225	163.028	173.587	5.1677	175.511	170.129	181.063	1	1	1	1	2	0.0433117	0.0433117
	22		k=No, extraction_date=3 vs extraction_date=4	-0.03975	<.0001	5.1313	169.237	164.041	174.598	5.0916	162.65	157.656	167.802	0	0	1	1	1	-0.0389223
	22		k=No, extraction_date=3 vs extraction_date=6	0.03635	<.0001	5.1313	169.237	164.041	174.598	5.1677	175.511	170.129	181.063	1	0	1	1	1	0.0370706
	22		k=No, extraction_date=4 vs extraction_date=5	0.05403	<.0001	5.0916	162.65	157.656	167.802	5.1456	171.674	166.407	177.109	0	0	1	1	1	0.0554846
	22		k=No, extraction_date=4 vs extraction_date=6	0.0761	<.0001	5.0916	162.65	157.656	167.802	5.1677	175.511	170.129	181.063	1	0	1	1	1	0.0790705
	22		k=No, extraction_date=5 vs extraction_date=6	0.02207	<.0001	5.1456	171.674	166.407	177.109	5.1677	175.511	170.129	181.063	1	0	1	1	1	0.022346
	22		k=Vt, extraction_date=4 vs extraction_date=6	0.09228	0.0178	5.1365	170.119	152.755	189.457	5.2288	186.569	167.526	207.776	1	0	1	1	1	0.0966938
	23		Comparison	Effect size	P-value	LSmean 1	BT 1	95% CI		LSmean 2	BT 2	95% CI		lastExtr6	firstExtr2	1of2extract	2of2extract	Sec2First1	Percchange	PercchangePOS	PerccghangeNEG	An > Dv	An > Dy	An > Em	An > Ev	An > No	An > Vt	Dv > Dy	Dv > Em	Dv > Ev	Dv > No	Dv > Vt	Dy > Em	Dy > Ev	Dy > No	Dy > Vt	Em > Ev	Em > No	Em > Vt	Ev > No	Ev > Vt	No > Vt	An < Dv	An < Dy	An < Em	An < Ev	An < No	An < Vt	Dv < Dy
	23	GDY male	k=An vs k=Dv, extraction_date=2	-0.2818	<.0001	4.7864	119.869	113.742	126.326	4.5047	90.4412	85.2967	95.8961	0	0	1	0	1	-0.2455			-0.2455
	23		k=An vs k=Dy, extraction_date=2	-0.3059	0.0089	4.7864	119.869	113.742	126.326	4.4805	88.2788	76.7863	101.491	0	0	1	0	1	-0.26354				-0.26354
	23		k=An vs k=Em, extraction_date=2	-0.3874	<.0001	4.7864	119.869	113.742	126.326	4.3991	81.3776	72.3957	91.4739	0	0	1	0	1	-0.321113					-0.321113
	23		k=An vs k=Ev, extraction_date=2	-0.1326	0.0084	4.7864	119.869	113.742	126.326	4.6538	104.983	100.452	109.719	0	0	1	0	1	-0.124185						-0.124185
	23		k=An vs k=No, extraction_date=2	-0.2601	<.0001	4.7864	119.869	113.742	126.326	4.5263	92.416	89.447	95.4835	0	0	1	0	1	-0.229026							-0.229026
	23		k=An vs k=Dv, extraction_date=3	-0.2034	<.0001	4.745	115.008	109.133	121.199	4.5416	93.8408	88.489	99.5163	0	0	1	0	1	-0.184048			-0.184048
	23		k=An vs k=Dy, extraction_date=3	-0.3262	0.0034	4.745	115.008	109.133	121.199	4.4188	82.9966	72.0533	95.6021	0	0	1	0	1	-0.278339				-0.278339
	23		k=An vs k=Em, extraction_date=3	-0.4109	<.0001	4.745	115.008	109.133	121.199	4.334	76.2487	67.8329	85.7086	0	0	1	0	1	-0.337013					-0.337013
	23		k=An vs k=No, extraction_date=3	-0.2067	<.0001	4.745	115.008	109.133	121.199	4.5382	93.5223	90.5391	96.6038	0	0	1	0	1	-0.186818							-0.186818
	23		k=An vs k=Dv, extraction_date=4	-0.2319	<.0001	4.7276	113.024	107.217	119.145	4.4957	89.6309	84.5192	95.0518	0	0	1	0	1	-0.206975			-0.206975
	23		k=An vs k=Dy, extraction_date=4	-0.351	0.0008	4.7276	113.024	107.217	119.145	4.3767	79.575	69.0828	91.6608	0	0	1	0	1	-0.295946				-0.295946
	23		k=An vs k=Em, extraction_date=4	-0.4358	<.0001	4.7276	113.024	107.217	119.145	4.2919	73.1052	65.0364	82.1752	0	0	1	0	1	-0.353188					-0.353188
	23		k=An vs k=Ev, extraction_date=4	-0.1297	0.0132	4.7276	113.024	107.217	119.145	4.5979	99.2756	94.9815	103.764	0	0	1	0	1	-0.121641						-0.121641
	23		k=An vs k=No, extraction_date=4	-0.2255	<.0001	4.7276	113.024	107.217	119.145	4.5021	90.2064	87.3289	93.1786	0	0	1	0	1	-0.201883							-0.201883
	23		k=An vs k=Dv, extraction_date=5	-0.2601	<.0001	4.781	119.224	113.098	125.681	4.5209	91.9183	86.6489	97.5081	0	0	1	0	1	-0.229026			-0.229026
	23		k=An vs k=Dy, extraction_date=5	-0.3005	0.015	4.781	119.224	113.098	125.681	4.4805	88.2788	76.639	101.686	0	0	1	0	1	-0.259552				-0.259552
	23		k=An vs k=No, extraction_date=5	-0.2252	<.0001	4.781	119.224	113.098	125.681	4.5558	95.1829	92.1503	98.3153	0	0	1	0	1	-0.201643							-0.201643
	23		k=An vs k=Dv, extraction_date=6	-0.2848	<.0001	4.8442	127.002	120.489	133.867	4.5594	95.5261	90.05	101.335	1	0	1	0	1	-0.247835			-0.247835
	23		k=An vs k=Em, extraction_date=6	-0.2941	0.0006	4.8442	127.002	120.489	133.867	4.5501	94.6419	84.1959	106.384	1	0	1	0	1	-0.254798					-0.254798
	23		k=An vs k=No, extraction_date=6	-0.267	<.0001	4.8442	127.002	120.489	133.867	4.5772	97.2417	94.1454	100.44	1	0	1	0	1	-0.234327							-0.234327
	23		k=Dv vs k=Ev, extraction_date=2	0.1492	0.0019	4.5047	90.4412	85.2967	95.8961	4.6538	104.983	100.452	109.719	0	0	1	0	1	0.160789
	23		k=Dv vs k=Ev, extraction_date=5	0.2096	<.0001	4.5209	91.9183	86.6489	97.5081	4.7306	113.364	108.471	118.477	0	0	1	0	1	0.233308
	23		k=Dv vs k=Dy, extraction_date=6	0.3217	0.0072	4.5594	95.5261	90.05	101.335	4.8811	131.776	114.21	152.043	1	0	1	0	1	0.379471																														0.379471
	23		k=Dv vs k=Ev, extraction_date=6	0.2266	<.0001	4.5594	95.5261	90.05	101.335	4.786	119.821	114.65	125.226	1	0	1	0	1	0.254328
	23		k=Dy vs k=No, extraction_date=6	-0.3039	0.0067	4.8811	131.776	114.21	152.043	4.5772	97.2417	94.1454	100.44	1	0	1	0	1	-0.262065																-0.262065
	23		k=Em vs k=Ev, extraction_date=2	0.2548	0.0098	4.3991	81.3776	72.3957	91.4739	4.6538	104.983	100.452	109.719	0	0	1	0	1	0.290075
	23		k=Em vs k=Ev, extraction_date=3	0.3072	0.0002	4.334	76.2487	67.8329	85.7086	4.6412	103.669	99.1904	108.349	0	0	1	0	1	0.359613
	23		k=Em vs k=Ev, extraction_date=4	0.3061	0.0002	4.2919	73.1052	65.0364	82.1752	4.5979	99.2756	94.9815	103.764	0	0	1	0	1	0.357982
	23		k=Em vs k=Ev, extraction_date=6	0.2359	0.0337	4.5501	94.6419	84.1959	106.384	4.786	119.821	114.65	125.226	1	0	1	0	1	0.266048
	23		k=Ev vs k=No, extraction_date=2	-0.1275	<.0001	4.6538	104.983	100.452	109.719	4.5263	92.416	89.447	95.4835	0	0	1	0	1	-0.119707																					-0.119707
	23		k=Ev vs k=No, extraction_date=3	-0.1029	0.0039	4.6412	103.669	99.1904	108.349	4.5382	93.5223	90.5391	96.6038	0	0	1	0	1	-0.097873																					-0.097873
	23		k=Ev vs k=No, extraction_date=4	-0.09584	0.0143	4.5979	99.2756	94.9815	103.764	4.5021	90.2064	87.3289	93.1786	0	0	1	0	1	-0.0913543																					-0.0913543
	23		k=Ev vs k=No, extraction_date=5	-0.1747	<.0001	4.7306	113.364	108.471	118.477	4.5558	95.1829	92.1503	98.3153	0	0	1	0	1	-0.160375																					-0.160375
	23		k=Ev vs k=No, extraction_date=6	-0.2087	<.0001	4.786	119.821	114.65	125.226	4.5772	97.2417	94.1454	100.44	1	0	1	0	1	-0.188442																					-0.188442
	23		k=An, extraction_date=2 vs extraction_date=4	-0.0588	0.0002	4.7864	119.869	113.742	126.326	4.7276	113.024	107.217	119.145	0	1	1	1	2	-0.0571047		-0.0571047
	23		k=An, extraction_date=2 vs extraction_date=6	0.05776	0.0003	4.7864	119.869	113.742	126.326	4.8442	127.002	120.489	133.867	1	1	1	1	2	0.0595031	0.0595031
	23		k=An, extraction_date=3 vs extraction_date=6	0.09925	<.0001	4.745	115.008	109.133	121.199	4.8442	127.002	120.489	133.867	1	0	1	1	1	0.104287
	23		k=An, extraction_date=4 vs extraction_date=5	0.05334	0.0016	4.7276	113.024	107.217	119.145	4.781	119.224	113.098	125.681	0	0	1	1	1	0.0548515
	23		k=An, extraction_date=4 vs extraction_date=6	0.1166	<.0001	4.7276	113.024	107.217	119.145	4.8442	127.002	120.489	133.867	1	0	1	1	1	0.12367
	23		k=An, extraction_date=5 vs extraction_date=6	0.06323	<.0001	4.781	119.224	113.098	125.681	4.8442	127.002	120.489	133.867	1	0	1	1	1	0.0652399
	23		k=Dv, extraction_date=2 vs extraction_date=6	0.05471	0.001	4.5047	90.4412	85.2967	95.8961	4.5594	95.5261	90.05	101.335	1	1	1	1	2	0.0562237	0.0562237
	23		k=Dv, extraction_date=3 vs extraction_date=4	-0.04586	0.0146	4.5416	93.8408	88.489	99.5163	4.4957	89.6309	84.5192	95.0518	0	0	1	1	1	-0.0448625
	23		k=Dv, extraction_date=4 vs extraction_date=6	0.06364	<.0001	4.4957	89.6309	84.5192	95.0518	4.5594	95.5261	90.05	101.335	1	0	1	1	1	0.0657726
	23		k=Dy, extraction_date=2 vs extraction_date=6	0.4006	<.0001	4.4805	88.2788	76.7863	101.491	4.8811	131.776	114.21	152.043	1	1	1	1	2	0.49272	0.49272
	23		k=Dy, extraction_date=3 vs extraction_date=6	0.4623	<.0001	4.4188	82.9966	72.0533	95.6021	4.8811	131.776	114.21	152.043	1	0	1	1	1	0.587722
	23		k=Dy, extraction_date=4 vs extraction_date=6	0.5045	<.0001	4.3767	79.575	69.0828	91.6608	4.8811	131.776	114.21	152.043	1	0	1	1	1	0.655992
	23		k=Dy, extraction_date=5 vs extraction_date=6	0.4007	<.0001	4.4805	88.2788	76.639	101.686	4.8811	131.776	114.21	152.043	1	0	1	1	1	0.49272
	23		k=Em, extraction_date=2 vs extraction_date=4	-0.1072	0.0105	4.3991	81.3776	72.3957	91.4739	4.2919	73.1052	65.0364	82.1752	0	1	1	1	2	-0.101654		-0.101654
	23		k=Em, extraction_date=2 vs extraction_date=5	0.1834	<.0001	4.3991	81.3776	72.3957	91.4739	4.5825	97.7585	86.9686	109.887	0	1	1	1	2	0.201295	0.201295
	23		k=Em, extraction_date=2 vs extraction_date=6	0.151	<.0001	4.3991	81.3776	72.3957	91.4739	4.5501	94.6419	84.1959	106.384	1	1	1	1	2	0.162997	0.162997
	23		k=Em, extraction_date=3 vs extraction_date=5	0.2485	<.0001	4.334	76.2487	67.8329	85.7086	4.5825	97.7585	86.9686	109.887	0	0	1	1	1	0.282101
	23		k=Em, extraction_date=3 vs extraction_date=6	0.2161	<.0001	4.334	76.2487	67.8329	85.7086	4.5501	94.6419	84.1959	106.384	1	0	1	1	1	0.241226
	23		k=Em, extraction_date=4 vs extraction_date=5	0.2906	<.0001	4.2919	73.1052	65.0364	82.1752	4.5825	97.7585	86.9686	109.887	0	0	1	1	1	0.33723
	23		k=Em, extraction_date=4 vs extraction_date=6	0.2582	<.0001	4.2919	73.1052	65.0364	82.1752	4.5501	94.6419	84.1959	106.384	1	0	1	1	1	0.294598
	23		k=Ev, extraction_date=2 vs extraction_date=4	-0.05591	<.0001	4.6538	104.983	100.452	109.719	4.5979	99.2756	94.9815	103.764	0	1	1	1	2	-0.0543663		-0.0543663
	23		k=Ev, extraction_date=2 vs extraction_date=5	0.07671	<.0001	4.6538	104.983	100.452	109.719	4.7306	113.364	108.471	118.477	0	1	1	1	2	0.0798261	0.0798261
	23		k=Ev, extraction_date=2 vs extraction_date=6	0.1321	<.0001	4.6538	104.983	100.452	109.719	4.786	119.821	114.65	125.226	1	1	1	1	2	0.141337	0.141337
	23		k=Ev, extraction_date=3 vs extraction_date=4	-0.04325	0.0023	4.6412	103.669	99.1904	108.349	4.5979	99.2756	94.9815	103.764	0	0	1	1	1	-0.0423759
	23		k=Ev, extraction_date=3 vs extraction_date=5	0.08937	<.0001	4.6412	103.669	99.1904	108.349	4.7306	113.364	108.471	118.477	0	0	1	1	1	0.093518
	23		k=Ev, extraction_date=3 vs extraction_date=6	0.1448	<.0001	4.6412	103.669	99.1904	108.349	4.786	119.821	114.65	125.226	1	0	1	1	1	0.155808
	23		k=Ev, extraction_date=4 vs extraction_date=5	0.1326	<.0001	4.5979	99.2756	94.9815	103.764	4.7306	113.364	108.471	118.477	0	0	1	1	1	0.141907
	23		k=Ev, extraction_date=4 vs extraction_date=6	0.188	<.0001	4.5979	99.2756	94.9815	103.764	4.786	119.821	114.65	125.226	1	0	1	1	1	0.206954
	23		k=Ev, extraction_date=5 vs extraction_date=6	0.05542	<.0001	4.7306	113.364	108.471	118.477	4.786	119.821	114.65	125.226	1	0	1	1	1	0.0569633
	23		k=No, extraction_date=2 vs extraction_date=4	-0.02424	0.0013	4.5263	92.416	89.447	95.4835	4.5021	90.2064	87.3289	93.1786	0	1	1	1	2	-0.0239095		-0.0239095
	23		k=No, extraction_date=2 vs extraction_date=5	0.02948	<.0001	4.5263	92.416	89.447	95.4835	4.5558	95.1829	92.1503	98.3153	0	1	1	1	2	0.0299394	0.0299394
	23		k=No, extraction_date=2 vs extraction_date=6	0.05089	<.0001	4.5263	92.416	89.447	95.4835	4.5772	97.2417	94.1454	100.44	1	1	1	1	2	0.0522177	0.0522177
	23		k=No, extraction_date=3 vs extraction_date=4	-0.03614	<.0001	4.5382	93.5223	90.5391	96.6038	4.5021	90.2064	87.3289	93.1786	0	0	1	1	1	-0.0354562
	23		k=No, extraction_date=3 vs extraction_date=6	0.03899	<.0001	4.5382	93.5223	90.5391	96.6038	4.5772	97.2417	94.1454	100.44	1	0	1	1	1	0.0397705
	23		k=No, extraction_date=4 vs extraction_date=5	0.05372	<.0001	4.5021	90.2064	87.3289	93.1786	4.5558	95.1829	92.1503	98.3153	0	0	1	1	1	0.055168
	23		k=No, extraction_date=4 vs extraction_date=6	0.07513	<.0001	4.5021	90.2064	87.3289	93.1786	4.5772	97.2417	94.1454	100.44	1	0	1	1	1	0.0779919
	23		k=No, extraction_date=5 vs extraction_date=6	0.02141	0.0026	4.5558	95.1829	92.1503	98.3153	4.5772	97.2417	94.1454	100.44	1	0	1	1	1	0.0216306
	9		Comparison	Effect size	P-value	LSmean 1	BT 1	95% CI		LSmean 2	BT 2	95% CI		lastExtr6	firstExtr2	1of2extract	2of2extract	Sec2First1	Percchange	PercchangePOS	PerccghangeNEG	An > Dv	An > Dy	An > Em	An > Ev	An > No	An > Vt	Dv > Dy	Dv > Em	Dv > Ev	Dv > No	Dv > Vt	Dy > Em	Dy > Ev	Dy > No	Dy > Vt	Em > Ev	Em > No	Em > Vt	Ev > No	Ev > Vt	No > Vt	An < Dv	An < Dy	An < Em	An < Ev	An < No	An < Vt	Dv < Dy
	9	GDY male dog	k=An vs k=No, extraction_date=2	-0.232	<.0001	6.2361	510.862	478.003	545.98	6.0041	405.086	389.927	420.835	0	0	1	0	1	-0.207054							-0.207054
	9		k=An vs k=No, extraction_date=3	-0.2102	<.0001	6.2139	499.646	467.508	533.993	6.0037	404.924	389.786	420.651	0	0	1	0	1	-0.189578							-0.189578
	9		k=An vs k=No, extraction_date=4	-0.2254	<.0001	6.1843	485.073	453.775	518.53	5.9589	387.184	372.709	402.221	0	0	1	0	1	-0.201803							-0.201803
	9		k=An vs k=No, extraction_date=5	-0.2135	<.0001	6.2107	498.05	465.914	532.402	5.9971	402.261	387.222	417.883	0	0	1	0	1	-0.192329							-0.192329
	9		k=An vs k=No, extraction_date=6	-0.3088	<.0001	6.3458	570.093	533.309	609.415	6.037	418.635	403	434.877	1	0	1	0	1	-0.265672							-0.265672
	9		k=Dv vs k=No, extraction_date=2	-0.2618	0.0031	6.2659	526.315	467.683	592.298	6.0041	405.086	389.927	420.835	0	0	1	0	1	-0.230335												-0.230335
	9		k=Dv vs k=No, extraction_date=3	-0.2966	0.0002	6.3003	544.735	484.032	613.051	6.0037	404.924	389.786	420.651	0	0	1	0	1	-0.256659												-0.256659
	9		k=Dv vs k=No, extraction_date=4	-0.2955	0.0002	6.2545	520.349	462.363	585.607	5.9589	387.184	372.709	402.221	0	0	1	0	1	-0.255915												-0.255915
	9		k=Dv vs k=No, extraction_date=5	-0.2826	0.0007	6.2797	533.629	474.117	600.611	5.9971	402.261	387.222	417.883	0	0	1	0	1	-0.246179												-0.246179
	9		k=Dv vs k=No, extraction_date=6	-0.2812	0.0008	6.3182	554.574	492.726	624.185	6.037	418.635	403	434.877	1	0	1	0	1	-0.245123												-0.245123
	9		k=Ev vs k=No, extraction_date=2	-0.1764	<.0001	6.1805	483.234	459.117	508.617	6.0041	405.086	389.927	420.835	0	0	1	0	1	-0.161717																					-0.161717
	9		k=Ev vs k=No, extraction_date=3	-0.1908	<.0001	6.1945	490.046	465.59	515.788	6.0037	404.924	389.786	420.651	0	0	1	0	1	-0.173702																					-0.173702
	9		k=Ev vs k=No, extraction_date=4	-0.1981	<.0001	6.157	472.01	448.436	496.823	5.9589	387.184	372.709	402.221	0	0	1	0	1	-0.179712																					-0.179712
	9		k=Ev vs k=No, extraction_date=5	-0.2042	<.0001	6.2014	493.439	468.777	519.4	5.9971	402.261	387.222	417.883	0	0	1	0	1	-0.184782																					-0.184782
	9		k=Ev vs k=No, extraction_date=6	-0.2374	<.0001	6.2744	530.808	504.307	558.701	6.037	418.635	403	434.877	1	0	1	0	1	-0.211324																					-0.211324
	9		k=An, extraction_date=2 vs extraction_date=4	-0.05173	<.0001	6.2361	510.862	478.003	545.98	6.1843	485.073	453.775	518.53	0	1	1	1	2	-0.0504812		-0.0504812
	9		k=An, extraction_date=2 vs extraction_date=6	0.1098	<.0001	6.2361	510.862	478.003	545.98	6.3458	570.093	533.309	609.415	1	1	1	1	2	0.115943	0.115943
	9		k=An, extraction_date=3 vs extraction_date=6	0.1319	<.0001	6.2139	499.646	467.508	533.993	6.3458	570.093	533.309	609.415	1	0	1	1	1	0.140994
	9		k=An, extraction_date=4 vs extraction_date=6	0.1615	<.0001	6.1843	485.073	453.775	518.53	6.3458	570.093	533.309	609.415	1	0	1	1	1	0.175272
	9		k=An, extraction_date=5 vs extraction_date=6	0.1352	<.0001	6.2107	498.05	465.914	532.402	6.3458	570.093	533.309	609.415	1	0	1	1	1	0.144651
	9		k=Dv, extraction_date=2 vs extraction_date=3	0.03446	0.0003	6.2659	526.315	467.683	592.298	6.3003	544.735	484.032	613.051	0	1	1	1	2	0.0349985	0.0349985
	9		k=Dv, extraction_date=2 vs extraction_date=6	0.05231	<.0001	6.2659	526.315	467.683	592.298	6.3182	554.574	492.726	624.185	1	1	1	1	2	0.0536918	0.0536918
	9		k=Dv, extraction_date=3 vs extraction_date=4	-0.04588	<.0001	6.3003	544.735	484.032	613.051	6.2545	520.349	462.363	585.607	0	0	1	1	1	-0.044767
	9		k=Dv, extraction_date=4 vs extraction_date=6	0.06373	<.0001	6.2545	520.349	462.363	585.607	6.3182	554.574	492.726	624.185	1	0	1	1	1	0.0657726
	9		k=Dv, extraction_date=5 vs extraction_date=6	0.03847	0.0001	6.2797	533.629	474.117	600.611	6.3182	554.574	492.726	624.185	1	0	1	1	1	0.0392507
	9		k=Ev, extraction_date=2 vs extraction_date=6	0.0939	<.0001	6.1805	483.234	459.117	508.617	6.2744	530.808	504.307	558.701	1	1	1	1	2	0.0984499	0.0984499
	9		k=Ev, extraction_date=3 vs extraction_date=4	-0.03751	<.0001	6.1945	490.046	465.59	515.788	6.157	472.01	448.436	496.823	0	0	1	1	1	-0.0368056
	9		k=Ev, extraction_date=3 vs extraction_date=6	0.07985	<.0001	6.1945	490.046	465.59	515.788	6.2744	530.808	504.307	558.701	1	0	1	1	1	0.0831787
	9		k=Ev, extraction_date=4 vs extraction_date=5	0.04433	<.0001	6.157	472.01	448.436	496.823	6.2014	493.439	468.777	519.4	0	0	1	1	1	0.0454004
	9		k=Ev, extraction_date=4 vs extraction_date=6	0.1174	<.0001	6.157	472.01	448.436	496.823	6.2744	530.808	504.307	558.701	1	0	1	1	1	0.124569
	9		k=Ev, extraction_date=5 vs extraction_date=6	0.07303	<.0001	6.2014	493.439	468.777	519.4	6.2744	530.808	504.307	558.701	1	0	1	1	1	0.0757305
	9		k=No, extraction_date=2 vs extraction_date=4	-0.04513	<.0001	6.0041	405.086	389.927	420.835	5.9589	387.184	372.709	402.221	0	1	1	1	2	-0.0441937		-0.0441937
	9		k=No, extraction_date=2 vs extraction_date=6	0.03296	<.0001	6.0041	405.086	389.927	420.835	6.037	418.635	403	434.877	1	1	1	1	2	0.0334472	0.0334472
	9		k=No, extraction_date=3 vs extraction_date=4	-0.04479	<.0001	6.0037	404.924	389.786	420.651	5.9589	387.184	372.709	402.221	0	0	1	1	1	-0.0438113
	9		k=No, extraction_date=3 vs extraction_date=6	0.03329	<.0001	6.0037	404.924	389.786	420.651	6.037	418.635	403	434.877	1	0	1	1	1	0.0338607
	9		k=No, extraction_date=4 vs extraction_date=5	0.03821	<.0001	5.9589	387.184	372.709	402.221	5.9971	402.261	387.222	417.883	0	0	1	1	1	0.038939
	9		k=No, extraction_date=4 vs extraction_date=6	0.07809	<.0001	5.9589	387.184	372.709	402.221	6.037	418.635	403	434.877	1	0	1	1	1	0.0812308
	9		k=No, extraction_date=5 vs extraction_date=6	0.03987	<.0001	5.9971	402.261	387.222	417.883	6.037	418.635	403	434.877	1	0	1	1	1	0.0407067
	9		k=Vt, extraction_date=2 vs extraction_date=6	0.07174	0.0146	6.0703	432.811	389.015	481.537	6.142	464.983	417.899	517.372	1	1	1	1	2	0.074333	0.074333
	9		k=Vt, extraction_date=4 vs extraction_date=6	0.1013	<.0001	6.0407	420.187	377.639	467.529	6.142	464.983	417.899	517.372	1	0	1	1	1	0.106609
	9		k=Vt, extraction_date=5 vs extraction_date=6	0.07576	0.0043	6.0663	431.083	387.431	479.652	6.142	464.983	417.899	517.372	1	0	1	1	1	0.0786389
	5		Comparison	Effect size	P-value	LSmean 1	BT 1	95% CI		LSmean 2	BT 2	95% CI		lastExtr6	firstExtr2	1of2extract	2of2extract	Sec2First1	Percchange	PercchangePOS	PerccghangeNEG	An > Dv	An > Dy	An > Em	An > Ev	An > No	An > Vt	Dv > Dy	Dv > Em	Dv > Ev	Dv > No	Dv > Vt	Dy > Em	Dy > Ev	Dy > No	Dy > Vt	Em > Ev	Em > No	Em > Vt	Ev > No	Ev > Vt	No > Vt	An < Dv	An < Dy	An < Em	An < Ev	An < No	An < Vt	Dv < Dy
	5	Deworming cert	k=An vs k=Dv, extraction_date=2	-0.2377	0.0341	3.3648	28.9277	26.1703	31.9757	3.1271	22.8077	20.8569	24.9411	0	0	1	0	1	-0.211561			-0.211561
	5		k=An vs k=Dy, extraction_date=2	-0.5784	<.0001	3.3648	28.9277	26.1703	31.9757	2.7864	16.2225	13.4022	19.6363	0	0	1	0	1	-0.439205				-0.439205
	5		k=An vs k=No, extraction_date=2	-0.3021	<.0001	3.3648	28.9277	26.1703	31.9757	3.0627	21.3852	20.1139	22.7369	0	0	1	0	1	-0.260736							-0.260736
	5		k=An vs k=Dy, extraction_date=3	-0.6062	<.0001	3.3306	27.9551	25.2998	30.8891	2.7245	15.2488	12.5736	18.4932	0	0	1	0	1	-0.454526				-0.454526
	5		k=An vs k=No, extraction_date=3	-0.2459	0.0006	3.3306	27.9551	25.2998	30.8891	3.0847	21.8609	20.5742	23.2281	0	0	1	0	1	-0.218							-0.218
	5		k=An vs k=Dv, extraction_date=4	-0.2494	0.0152	3.3525	28.5741	25.8686	31.5625	3.1032	22.2691	20.3611	24.3558	0	0	1	0	1	-0.220654			-0.220654
	5		k=An vs k=Dy, extraction_date=4	-0.6702	<.0001	3.3525	28.5741	25.8686	31.5625	2.6823	14.6187	12.054	17.729	0	0	1	0	1	-0.488394				-0.488394
	5		k=An vs k=Em, extraction_date=4	-0.3664	0.0112	3.3525	28.5741	25.8686	31.5625	2.9861	19.8083	16.8228	23.3236	0	0	1	0	1	-0.306775					-0.306775
	5		k=An vs k=No, extraction_date=4	-0.301	<.0001	3.3525	28.5741	25.8686	31.5625	3.0515	21.147	19.9031	22.4687	0	0	1	0	1	-0.259922							-0.259922
	5		k=An vs k=Dv, extraction_date=5	-0.2758	0.0025	3.4035	30.0692	27.2269	33.2081	3.1277	22.8214	20.8625	24.9643	0	0	1	0	1	-0.241035			-0.241035
	5		k=An vs k=No, extraction_date=5	-0.3017	<.0001	3.4035	30.0692	27.2269	33.2081	3.1018	22.2379	20.9327	23.6245	0	0	1	0	1	-0.26044							-0.26044
	5		k=An vs k=Dv, extraction_date=6	-0.307	0.0002	3.4732	32.2397	29.2055	35.5892	3.1662	23.7172	21.6813	25.9442	1	0	1	0	1	-0.264349			-0.264349
	5		k=An vs k=No, extraction_date=6	-0.3453	<.0001	3.4732	32.2397	29.2055	35.5892	3.1278	22.8237	21.485	24.2459	1	0	1	0	1	-0.292063							-0.292063
	5		k=Dv vs k=Ev, extraction_date=2	0.3291	<.0001	3.1271	22.8077	20.8569	24.9411	3.4562	31.6963	29.4767	34.083	0	0	1	0	1	0.389717
	5		k=Dv vs k=Dy, extraction_date=3	-0.4243	0.0126	3.1488	23.3081	21.3111	25.4922	2.7245	15.2488	12.5736	18.4932	0	0	1	0	1	-0.345772									-0.345772
	5		k=Dv vs k=Ev, extraction_date=3	0.2601	0.0002	3.1488	23.3081	21.3111	25.4922	3.4089	30.232	28.1205	32.502	0	0	1	0	1	0.29706
	5		k=Dv vs k=Dy, extraction_date=4	-0.4208	0.0145	3.1032	22.2691	20.3611	24.3558	2.6823	14.6187	12.054	17.729	0	0	1	0	1	-0.343544									-0.343544
	5		k=Dv vs k=Ev, extraction_date=4	0.2689	<.0001	3.1032	22.2691	20.3611	24.3558	3.3721	29.1397	27.1082	31.3234	0	0	1	0	1	0.308524
	5		k=Dv vs k=Ev, extraction_date=5	0.3594	<.0001	3.1277	22.8214	20.8625	24.9643	3.4871	32.691	30.4238	35.1271	0	0	1	0	1	0.43247
	5		k=Dv vs k=Ev, extraction_date=6	0.3687	<.0001	3.1662	23.7172	21.6813	25.9442	3.535	34.295	31.9147	36.8528	1	0	1	0	1	0.445998
	5		k=Dy vs k=Ev, extraction_date=2	0.6697	<.0001	2.7864	16.2225	13.4022	19.6363	3.4562	31.6963	29.4767	34.083	0	0	1	0	1	0.953847
	5		k=Dy vs k=Ev, extraction_date=3	0.6845	<.0001	2.7245	15.2488	12.5736	18.4932	3.4089	30.232	28.1205	32.502	0	0	1	0	1	0.982582
	5		k=Dy vs k=Ev, extraction_date=4	0.6898	<.0001	2.6823	14.6187	12.054	17.729	3.3721	29.1397	27.1082	31.3234	0	0	1	0	1	0.993317
	5		k=Dy vs k=No, extraction_date=4	0.3691	0.0411	2.6823	14.6187	12.054	17.729	3.0515	21.147	19.9031	22.4687	0	0	1	0	1	0.446577
	5		k=Em vs k=Ev, extraction_date=2	0.3629	0.0074	3.0933	22.0497	18.7264	25.9628	3.4562	31.6963	29.4767	34.083	0	0	1	0	1	0.437492
	5		k=Em vs k=Ev, extraction_date=3	0.3807	0.003	3.0282	20.66	17.5461	24.3265	3.4089	30.232	28.1205	32.502	0	0	1	0	1	0.463309
	5		k=Em vs k=Ev, extraction_date=4	0.386	0.0023	2.9861	19.8083	16.8228	23.3236	3.3721	29.1397	27.1082	31.3234	0	0	1	0	1	0.471085
	5		k=Ev vs k=No, extraction_date=2	-0.3934	<.0001	3.4562	31.6963	29.4767	34.083	3.0627	21.3852	20.1139	22.7369	0	0	1	0	1	-0.325309																					-0.325309
	5		k=Ev vs k=Vt, extraction_date=2	-0.3757	0.0069	3.4562	31.6963	29.4767	34.083	3.0805	21.7693	18.3759	25.7893	0	0	1	0	1	-0.313192																						-0.313192
	5		k=Ev vs k=No, extraction_date=3	-0.3242	<.0001	3.4089	30.232	28.1205	32.502	3.0847	21.8609	20.5742	23.2281	0	0	1	0	1	-0.276894																					-0.276894
	5		k=Ev vs k=Vt, extraction_date=3	-0.332	0.0464	3.4089	30.232	28.1205	32.502	3.0769	21.6911	18.3231	25.678	0	0	1	0	1	-0.282513																						-0.282513
	5		k=Ev vs k=No, extraction_date=4	-0.3206	<.0001	3.3721	29.1397	27.1082	31.3234	3.0515	21.147	19.9031	22.4687	0	0	1	0	1	-0.274287																					-0.274287
	5		k=Ev vs k=Vt, extraction_date=4	-0.34	0.0351	3.3721	29.1397	27.1082	31.3234	3.0322	20.7428	17.507	24.5767	0	0	1	0	1	-0.288158																						-0.288158
	5		k=Ev vs k=No, extraction_date=5	-0.3853	<.0001	3.4871	32.691	30.4238	35.1271	3.1018	22.2379	20.9327	23.6245	0	0	1	0	1	-0.319753																					-0.319753
	5		k=Ev vs k=Vt, extraction_date=5	-0.3885	0.0036	3.4871	32.691	30.4238	35.1271	3.0986	22.1669	18.7089	26.264	0	0	1	0	1	-0.321927																						-0.321927
	5		k=Ev vs k=No, extraction_date=6	-0.4071	<.0001	3.535	34.295	31.9147	36.8528	3.1278	22.8237	21.485	24.2459	1	0	1	0	1	-0.334489																					-0.334489
	5		k=Ev vs k=Vt, extraction_date=6	-0.3574	0.0161	3.535	34.295	31.9147	36.8528	3.1776	23.9891	20.2469	28.423	1	0	1	0	1	-0.300507																						-0.300507
	5		k=An, extraction_date=2 vs extraction_date=6	0.1084	<.0001	3.3648	28.9277	26.1703	31.9757	3.4732	32.2397	29.2055	35.5892	1	1	1	1	2	0.114493	0.114493
	5		k=An, extraction_date=3 vs extraction_date=6	0.1425	<.0001	3.3306	27.9551	25.2998	30.8891	3.4732	32.2397	29.2055	35.5892	1	0	1	1	1	0.153268
	5		k=An, extraction_date=4 vs extraction_date=6	0.1207	<.0001	3.3525	28.5741	25.8686	31.5625	3.4732	32.2397	29.2055	35.5892	1	0	1	1	1	0.128286
	5		k=Dv, extraction_date=4 vs extraction_date=6	0.06304	0.001	3.1032	22.2691	20.3611	24.3558	3.1662	23.7172	21.6813	25.9442	1	0	1	1	1	0.0650268
	5		k=Dy, extraction_date=2 vs extraction_date=5	0.6108	<.0001	2.7864	16.2225	13.4022	19.6363	3.3972	29.8803	24.6382	36.2378	0	1	1	1	2	0.841904	0.841904
	5		k=Dy, extraction_date=2 vs extraction_date=6	0.6313	<.0001	2.7864	16.2225	13.4022	19.6363	3.4177	30.4992	25.1066	37.05	1	1	1	1	2	0.880053	0.880053
	5		k=Dy, extraction_date=3 vs extraction_date=5	0.6728	<.0001	2.7245	15.2488	12.5736	18.4932	3.3972	29.8803	24.6382	36.2378	0	0	1	1	1	0.959521
	5		k=Dy, extraction_date=3 vs extraction_date=6	0.6933	<.0001	2.7245	15.2488	12.5736	18.4932	3.4177	30.4992	25.1066	37.05	1	0	1	1	1	1.00011
	5		k=Dy, extraction_date=4 vs extraction_date=5	0.7149	<.0001	2.6823	14.6187	12.054	17.729	3.3972	29.8803	24.6382	36.2378	0	0	1	1	1	1.04398
	5		k=Dy, extraction_date=4 vs extraction_date=6	0.7354	<.0001	2.6823	14.6187	12.054	17.729	3.4177	30.4992	25.1066	37.05	1	0	1	1	1	1.08632
	5		k=Em, extraction_date=2 vs extraction_date=5	0.162	<.0001	3.0933	22.0497	18.7264	25.9628	3.2553	25.9274	22.0196	30.5287	0	1	1	1	2	0.17586	0.17586
	5		k=Em, extraction_date=2 vs extraction_date=6	0.1237	0.0129	3.0933	22.0497	18.7264	25.9628	3.217	24.9531	21.1922	29.3815	1	1	1	1	2	0.131676	0.131676
	5		k=Em, extraction_date=3 vs extraction_date=5	0.2271	<.0001	3.0282	20.66	17.5461	24.3265	3.2553	25.9274	22.0196	30.5287	0	0	1	1	1	0.254955
	5		k=Em, extraction_date=3 vs extraction_date=6	0.1888	<.0001	3.0282	20.66	17.5461	24.3265	3.217	24.9531	21.1922	29.3815	1	0	1	1	1	0.207799
	5		k=Em, extraction_date=4 vs extraction_date=5	0.2692	<.0001	2.9861	19.8083	16.8228	23.3236	3.2553	25.9274	22.0196	30.5287	0	0	1	1	1	0.308917
	5		k=Em, extraction_date=4 vs extraction_date=6	0.2309	<.0001	2.9861	19.8083	16.8228	23.3236	3.217	24.9531	21.1922	29.3815	1	0	1	1	1	0.259733
	5		k=Ev, extraction_date=2 vs extraction_date=4	-0.08406	<.0001	3.4562	31.6963	29.4767	34.083	3.3721	29.1397	27.1082	31.3234	0	1	1	1	2	-0.0806607		-0.0806607
	5		k=Ev, extraction_date=2 vs extraction_date=6	0.07877	<.0001	3.4562	31.6963	29.4767	34.083	3.535	34.295	31.9147	36.8528	1	1	1	1	2	0.0819879	0.0819879
	5		k=Ev, extraction_date=3 vs extraction_date=5	0.07821	<.0001	3.4089	30.232	28.1205	32.502	3.4871	32.691	30.4238	35.1271	0	0	1	1	1	0.0813389
	5		k=Ev, extraction_date=3 vs extraction_date=6	0.126	<.0001	3.4089	30.232	28.1205	32.502	3.535	34.295	31.9147	36.8528	1	0	1	1	1	0.134396
	5		k=Ev, extraction_date=4 vs extraction_date=5	0.115	<.0001	3.3721	29.1397	27.1082	31.3234	3.4871	32.691	30.4238	35.1271	0	0	1	1	1	0.121873
	5		k=Ev, extraction_date=4 vs extraction_date=6	0.1628	<.0001	3.3721	29.1397	27.1082	31.3234	3.535	34.295	31.9147	36.8528	1	0	1	1	1	0.176919
	5		k=No, extraction_date=2 vs extraction_date=5	0.03906	0.0132	3.0627	21.3852	20.1139	22.7369	3.1018	22.2379	20.9327	23.6245	0	1	1	1	2	0.0398745	0.0398745
	5		k=No, extraction_date=2 vs extraction_date=6	0.06511	<.0001	3.0627	21.3852	20.1139	22.7369	3.1278	22.8237	21.485	24.2459	1	1	1	1	2	0.0672657	0.0672657
	5		k=No, extraction_date=3 vs extraction_date=4	-0.0332	0.0307	3.0847	21.8609	20.5742	23.2281	3.0515	21.147	19.9031	22.4687	0	0	1	1	1	-0.0326549
	5		k=No, extraction_date=3 vs extraction_date=6	0.04315	0.0002	3.0847	21.8609	20.5742	23.2281	3.1278	22.8237	21.485	24.2459	1	0	1	1	1	0.0440423
	5		k=No, extraction_date=4 vs extraction_date=5	0.0503	<.0001	3.0515	21.147	19.9031	22.4687	3.1018	22.2379	20.9327	23.6245	0	0	1	1	1	0.0515865
	5		k=No, extraction_date=4 vs extraction_date=6	0.07635	<.0001	3.0515	21.147	19.9031	22.4687	3.1278	22.8237	21.485	24.2459	1	0	1	1	1	0.0792863
	5		k=Vt, extraction_date=4 vs extraction_date=6	0.1454	0.0036	3.0322	20.7428	17.507	24.5767	3.1776	23.9891	20.2469	28.423	1	0	1	1	1	0.156502
	20		Comparison	Effect size	P-value	LSmean 1	BT 1	95% CI		LSmean 2	BT 2	95% CI		lastExtr6	firstExtr2	1of2extract	2of2extract	Sec2First1	Percchange	PercchangePOS	PerccghangeNEG	An > Dv	An > Dy	An > Em	An > Ev	An > No	An > Vt	Dv > Dy	Dv > Em	Dv > Ev	Dv > No	Dv > Vt	Dy > Em	Dy > Ev	Dy > No	Dy > Vt	Em > Ev	Em > No	Em > Vt	Ev > No	Ev > Vt	No > Vt	An < Dv	An < Dy	An < Em	An < Ev	An < No	An < Vt	Dv < Dy
	20	Deworming cert	k=An vs k=Dv, extraction_date=2	-0.2782	0.004	3.3891	29.6393	26.7175	32.8806	3.1109	22.4412	20.4707	24.6014	0	0	1	0	1	-0.242855			-0.242855
	20		k=An vs k=Dy, extraction_date=2	-0.61	<.0001	3.3891	29.6393	26.7175	32.8806	2.7791	16.1045	13.2397	19.5893	0	0	1	0	1	-0.456649				-0.456649
	20		k=An vs k=No, extraction_date=2	-0.3511	<.0001	3.3891	29.6393	26.7175	32.8806	3.038	20.8635	19.5805	22.2305	0	0	1	0	1	-0.296087							-0.296087
	20		k=An vs k=Dy, extraction_date=3	-0.6348	<.0001	3.3532	28.5941	25.789	31.7043	2.7184	15.1561	12.4268	18.4848	0	0	1	0	1	-0.469959				-0.469959
	20		k=An vs k=No, extraction_date=3	-0.288	<.0001	3.3532	28.5941	25.789	31.7043	3.0651	21.4366	20.1346	22.8228	0	0	1	0	1	-0.250313							-0.250313
	20		k=An vs k=Dv, extraction_date=4	-0.2573	0.0146	3.3441	28.3351	25.5679	31.4017	3.0868	21.9069	19.9786	24.0213	0	0	1	0	1	-0.226864			-0.226864
	20		k=An vs k=Dy, extraction_date=4	-0.6679	<.0001	3.3441	28.3351	25.5679	31.4017	2.6763	14.5312	11.9145	17.7227	0	0	1	0	1	-0.487164				-0.487164
	20		k=An vs k=Em, extraction_date=4	-0.3583	0.0237	3.3441	28.3351	25.5679	31.4017	2.9859	19.8043	16.75	23.4156	0	0	1	0	1	-0.301067					-0.301067
	20		k=An vs k=No, extraction_date=4	-0.3154	<.0001	3.3441	28.3351	25.5679	31.4017	3.0288	20.6724	19.4187	22.0071	0	0	1	0	1	-0.27043							-0.27043
	20		k=An vs k=Dv, extraction_date=5	-0.2841	0.0024	3.3955	29.8296	26.9222	33.0508	3.1114	22.4525	20.4713	24.6253	0	0	1	0	1	-0.247309			-0.247309
	20		k=An vs k=No, extraction_date=5	-0.3099	<.0001	3.3955	29.8296	26.9222	33.0508	3.0856	21.8806	20.5568	23.2896	0	0	1	0	1	-0.26648							-0.26648
	20		k=An vs k=Dv, extraction_date=6	-0.3285	<.0001	3.4784	32.4078	29.2733	35.878	3.1499	23.3337	21.2748	25.5919	1	0	1	0	1	-0.279997			-0.279997
	20		k=An vs k=No, extraction_date=6	-0.3592	<.0001	3.4784	32.4078	29.2733	35.878	3.1192	22.6283	21.2609	24.0835	1	0	1	0	1	-0.301765							-0.301765
	20		k=Dv vs k=Ev, extraction_date=2	0.3426	<.0001	3.1109	22.4412	20.4707	24.6014	3.4535	31.6108	29.3018	34.1019	0	0	1	0	1	0.408605
	20		k=Dv vs k=Dy, extraction_date=3	-0.4141	0.0282	3.1325	22.9312	20.9128	25.1445	2.7184	15.1561	12.4268	18.4848	0	0	1	0	1	-0.339065									-0.339065
	20		k=Dv vs k=Ev, extraction_date=3	0.2698	0.0002	3.1325	22.9312	20.9128	25.1445	3.4023	30.0331	27.8431	32.3953	0	0	1	0	1	0.309702
	20		k=Dv vs k=Dy, extraction_date=4	-0.4106	0.032	3.0868	21.9069	19.9786	24.0213	2.6763	14.5312	11.9145	17.7227	0	0	1	0	1	-0.336681									-0.336681
	20		k=Dv vs k=Ev, extraction_date=4	0.2767	<.0001	3.0868	21.9069	19.9786	24.0213	3.3636	28.893	26.7909	31.1601	0	0	1	0	1	0.318903
	20		k=Dv vs k=Ev, extraction_date=5	0.3762	<.0001	3.1114	22.4525	20.4713	24.6253	3.4877	32.7106	30.3521	35.2524	0	0	1	0	1	0.456884
	20		k=Dv vs k=Ev, extraction_date=6	0.3784	<.0001	3.1499	23.3337	21.2748	25.5919	3.5283	34.066	31.6005	36.7239	1	0	1	0	1	0.459947
	20		k=Dy vs k=Ev, extraction_date=2	0.6744	<.0001	2.7791	16.1045	13.2397	19.5893	3.4535	31.6108	29.3018	34.1019	0	0	1	0	1	0.962855
	20		k=Dy vs k=Ev, extraction_date=3	0.6839	<.0001	2.7184	15.1561	12.4268	18.4848	3.4023	30.0331	27.8431	32.3953	0	0	1	0	1	0.981591
	20		k=Dy vs k=Ev, extraction_date=4	0.6873	<.0001	2.6763	14.5312	11.9145	17.7227	3.3636	28.893	26.7909	31.1601	0	0	1	0	1	0.98834
	20		k=Em vs k=Ev, extraction_date=2	0.3605	0.0126	3.093	22.0431	18.6435	26.0626	3.4535	31.6108	29.3018	34.1019	0	0	1	0	1	0.434046
	20		k=Em vs k=Ev, extraction_date=3	0.3743	0.0065	3.028	20.6559	17.4702	24.4224	3.4023	30.0331	27.8431	32.3953	0	0	1	0	1	0.453973
	20		k=Em vs k=Ev, extraction_date=4	0.3777	0.0054	2.9859	19.8043	16.75	23.4156	3.3636	28.893	26.7909	31.1601	0	0	1	0	1	0.458925
	20		k=Ev vs k=No, extraction_date=2	-0.4155	<.0001	3.4535	31.6108	29.3018	34.1019	3.038	20.8635	19.5805	22.2305	0	0	1	0	1	-0.33999																					-0.33999
	20		k=Ev vs k=Vt, extraction_date=2	-0.3904	0.0055	3.4535	31.6108	29.3018	34.1019	3.0631	21.3938	17.9763	25.461	0	0	1	0	1	-0.323214																						-0.323214
	20		k=Ev vs k=No, extraction_date=3	-0.3371	<.0001	3.4023	30.0331	27.8431	32.3953	3.0651	21.4366	20.1346	22.8228	0	0	1	0	1	-0.286234																					-0.286234
	20		k=Ev vs k=Vt, extraction_date=3	-0.3426	0.0419	3.4023	30.0331	27.8431	32.3953	3.0597	21.3212	17.9339	25.3482	0	0	1	0	1	-0.290078																						-0.290078
	20		k=Ev vs k=No, extraction_date=4	-0.3348	<.0001	3.3636	28.893	26.7909	31.1601	3.0288	20.6724	19.4187	22.0071	0	0	1	0	1	-0.284519																					-0.284519
	20		k=Ev vs k=Vt, extraction_date=4	-0.3488	0.0352	3.3636	28.893	26.7909	31.1601	3.0148	20.385	17.1253	24.2652	0	0	1	0	1	-0.294466																						-0.294466
	20		k=Ev vs k=No, extraction_date=5	-0.402	<.0001	3.4877	32.7106	30.3521	35.2524	3.0856	21.8806	20.5568	23.2896	0	0	1	0	1	-0.331086																					-0.331086
	20		k=Ev vs k=Vt, extraction_date=5	-0.4065	0.0025	3.4877	32.7106	30.3521	35.2524	3.0812	21.7845	18.301	25.9311	0	0	1	0	1	-0.334023																						-0.334023
	20		k=Ev vs k=No, extraction_date=6	-0.4092	<.0001	3.5283	34.066	31.6005	36.7239	3.1192	22.6283	21.2609	24.0835	1	0	1	0	1	-0.335752																					-0.335752
	20		k=Ev vs k=Vt, extraction_date=6	-0.3681	0.0151	3.5283	34.066	31.6005	36.7239	3.1602	23.5753	19.8054	28.0628	1	0	1	0	1	-0.307952																						-0.307952
	20		k=An, extraction_date=3 vs extraction_date=6	0.1252	<.0001	3.3532	28.5941	25.789	31.7043	3.4784	32.4078	29.2733	35.878	1	0	1	1	1	0.133375
	20		k=An, extraction_date=4 vs extraction_date=6	0.1342	<.0001	3.3441	28.3351	25.5679	31.4017	3.4784	32.4078	29.2733	35.878	1	0	1	1	1	0.143736
	20		k=Dv, extraction_date=4 vs extraction_date=6	0.06305	0.0321	3.0868	21.9069	19.9786	24.0213	3.1499	23.3337	21.2748	25.5919	1	0	1	1	1	0.0651333
	20		k=Dy, extraction_date=2 vs extraction_date=5	0.6121	<.0001	2.7791	16.1045	13.2397	19.5893	3.3911	29.6986	24.3505	36.2213	0	1	1	1	2	0.844116	0.844116
	20		k=Dy, extraction_date=2 vs extraction_date=6	0.6326	<.0001	2.7791	16.1045	13.2397	19.5893	3.4117	30.3167	24.7989	37.0623	1	1	1	1	2	0.882499	0.882499
	20		k=Dy, extraction_date=3 vs extraction_date=5	0.6728	<.0001	2.7184	15.1561	12.4268	18.4848	3.3911	29.6986	24.3505	36.2213	0	0	1	1	1	0.959521
	20		k=Dy, extraction_date=3 vs extraction_date=6	0.6933	<.0001	2.7184	15.1561	12.4268	18.4848	3.4117	30.3167	24.7989	37.0623	1	0	1	1	1	1.00031
	20		k=Dy, extraction_date=4 vs extraction_date=5	0.7149	<.0001	2.6763	14.5312	11.9145	17.7227	3.3911	29.6986	24.3505	36.2213	0	0	1	1	1	1.04378
	20		k=Dy, extraction_date=4 vs extraction_date=6	0.7354	<.0001	2.6763	14.5312	11.9145	17.7227	3.4117	30.3167	24.7989	37.0623	1	0	1	1	1	1.08632
	20		k=Em, extraction_date=2 vs extraction_date=5	0.162	0.0031	3.093	22.0431	18.6435	26.0626	3.2551	25.9222	21.9244	30.649	0	1	1	1	2	0.175978	0.175978
	20		k=Em, extraction_date=3 vs extraction_date=5	0.2271	<.0001	3.028	20.6559	17.4702	24.4224	3.2551	25.9222	21.9244	30.649	0	0	1	1	1	0.254955
	20		k=Em, extraction_date=3 vs extraction_date=6	0.1888	<.0001	3.028	20.6559	17.4702	24.4224	3.2167	24.9457	21.0984	29.4944	1	0	1	1	1	0.207679
	20		k=Em, extraction_date=4 vs extraction_date=5	0.2692	<.0001	2.9859	19.8043	16.75	23.4156	3.2551	25.9222	21.9244	30.649	0	0	1	1	1	0.308917
	20		k=Em, extraction_date=4 vs extraction_date=6	0.2309	<.0001	2.9859	19.8043	16.75	23.4156	3.2167	24.9457	21.0984	29.4944	1	0	1	1	1	0.259607
	20		k=Ev, extraction_date=2 vs extraction_date=4	-0.08989	0.0002	3.4535	31.6108	29.3018	34.1019	3.3636	28.893	26.7909	31.1601	0	1	1	1	2	-0.0859774		-0.0859774
	20		k=Ev, extraction_date=2 vs extraction_date=6	0.07482	0.0073	3.4535	31.6108	29.3018	34.1019	3.5283	34.066	31.6005	36.7239	1	1	1	1	2	0.0776686	0.0776686
	20		k=Ev, extraction_date=3 vs extraction_date=5	0.08542	0.0003	3.4023	30.0331	27.8431	32.3953	3.4877	32.7106	30.3521	35.2524	0	0	1	1	1	0.0891526
	20		k=Ev, extraction_date=3 vs extraction_date=6	0.1261	<.0001	3.4023	30.0331	27.8431	32.3953	3.5283	34.066	31.6005	36.7239	1	0	1	1	1	0.134282
	20		k=Ev, extraction_date=4 vs extraction_date=5	0.1241	<.0001	3.3636	28.893	26.7909	31.1601	3.4877	32.7106	30.3521	35.2524	0	0	1	1	1	0.132129
	20		k=Ev, extraction_date=4 vs extraction_date=6	0.1647	<.0001	3.3636	28.893	26.7909	31.1601	3.5283	34.066	31.6005	36.7239	1	0	1	1	1	0.179039
	20		k=No, extraction_date=2 vs extraction_date=5	0.04763	0.009	3.038	20.8635	19.5805	22.2305	3.0856	21.8806	20.5568	23.2896	0	1	1	1	2	0.0487511	0.0487511
	20		k=No, extraction_date=2 vs extraction_date=6	0.08115	<.0001	3.038	20.8635	19.5805	22.2305	3.1192	22.6283	21.2609	24.0835	1	1	1	1	2	0.0845878	0.0845878
	20		k=No, extraction_date=3 vs extraction_date=6	0.05401	<.0001	3.0651	21.4366	20.1346	22.8228	3.1192	22.6283	21.2609	24.0835	1	0	1	1	1	0.0555902
	20		k=No, extraction_date=4 vs extraction_date=5	0.05686	<.0001	3.0288	20.6724	19.4187	22.0071	3.0856	21.8806	20.5568	23.2896	0	0	1	1	1	0.0584441
	20		k=No, extraction_date=4 vs extraction_date=6	0.09038	<.0001	3.0288	20.6724	19.4187	22.0071	3.1192	22.6283	21.2609	24.0835	1	0	1	1	1	0.094612
	24		Comparison	Effect size	P-value	LSmean 1	BT 1	CI low I	CI high 1	LSmean 2	BT 2	CI low 2	CI high 2	lastExtr6	firstExtr2	1of2extract	2of2extract	Sec2First1	Percchange	PercchangePOS	PerccghangeNEG	An > Dv	An > Dy	An > Em	An > Ev	An > No	An > Vt	Dv > Dy	Dv > Em	Dv > Ev	Dv > No	Dv > Vt	Dy > Em	Dy > Ev	Dy > No	Dy > Vt	Em > Ev	Em > No	Em > Vt	Ev > No	Ev > Vt	No > Vt	An < Dv	An < Dy	An < Em	An < Ev	An < No	An < Vt	Dv < Dy
	24	Patella exam cert	k=An vs k=No, extraction_date=2	-0.4279	0.0017	4.5445	94.1134	78.2667	113.168	4.1166	61.3503	57.09	65.9285	0	0	1	0	1	-0.348123							-0.348123
	24		k=An vs k=Vt, extraction_date=2	-0.5641	0.0319	4.5445	94.1134	78.2667	113.168	3.9803	53.5331	41.1276	69.6805	0	0	1	0	1	-0.431185								-0.431185
	24		k=An vs k=No, extraction_date=3	-0.3943	0.0068	4.5273	92.5085	76.9471	111.217	4.1329	62.3585	58.0464	66.991	0	0	1	0	1	-0.325916							-0.325916
	24		k=An vs k=No, extraction_date=4	-0.4178	0.0026	4.511	91.0128	75.6853	109.444	4.0932	59.9314	55.786	64.3848	0	0	1	0	1	-0.341506							-0.341506
	24		k=An vs k=No, extraction_date=5	-0.3931	0.0073	4.5343	93.1583	77.4694	112.024	4.1413	62.8845	58.5349	67.5574	0	0	1	0	1	-0.324971							-0.324971
	24		k=An vs k=No, extraction_date=6	-0.5696	<.0001	4.7236	112.573	93.6143	135.371	4.154	63.6882	59.2842	68.4195	1	0	1	0	1	-0.434248							-0.434248
	24		k=An vs k=Vt, extraction_date=6	-0.6153	0.0088	4.7236	112.573	93.6143	135.371	4.1083	60.8432	46.7987	79.1025	1	0	1	0	1	-0.459521								-0.459521
	24		k=An, extraction_date=2 vs extraction_date=6	0.1791	<.0001	4.5445	94.1134	78.2667	113.168	4.7236	112.573	93.6143	135.371	1	1	1	1	2	0.19614	0.19614
	24		k=An, extraction_date=3 vs extraction_date=6	0.1963	<.0001	4.5273	92.5085	76.9471	111.217	4.7236	112.573	93.6143	135.371	1	0	1	1	1	0.216892
	24		k=An, extraction_date=4 vs extraction_date=6	0.2126	<.0001	4.511	91.0128	75.6853	109.444	4.7236	112.573	93.6143	135.371	1	0	1	1	1	0.23689
	24		k=An, extraction_date=5 vs extraction_date=6	0.1893	<.0001	4.5343	93.1583	77.4694	112.024	4.7236	112.573	93.6143	135.371	1	0	1	1	1	0.208403
	24		k=Ev, extraction_date=2 vs extraction_date=4	-0.05752	0.038	4.3352	76.3402	65.442	89.0534	4.2777	72.0745	61.7537	84.1201	0	1	1	1	2	-0.0558781		-0.0558781
	24		k=Ev, extraction_date=2 vs extraction_date=6	0.0874	0.0001	4.3352	76.3402	65.442	89.0534	4.4226	83.3126	71.3294	97.3089	1	1	1	1	2	0.0913331	0.0913331
	24		k=Ev, extraction_date=3 vs extraction_date=6	0.1008	<.0001	4.3219	75.3316	64.5837	87.8682	4.4226	83.3126	71.3294	97.3089	1	0	1	1	1	0.105945
	24		k=Ev, extraction_date=4 vs extraction_date=6	0.1449	<.0001	4.2777	72.0745	61.7537	84.1201	4.4226	83.3126	71.3294	97.3089	1	0	1	1	1	0.155924
	24		k=Ev, extraction_date=5 vs extraction_date=6	0.1103	<.0001	4.3123	74.6119	63.9127	87.1021	4.4226	83.3126	71.3294	97.3089	1	0	1	1	1	0.116613
	24		k=No, extraction_date=2 vs extraction_date=6	0.03745	0.0005	4.1166	61.3503	57.09	65.9285	4.154	63.6882	59.2842	68.4195	1	1	1	1	2	0.0381082	0.0381082
	24		k=No, extraction_date=3 vs extraction_date=4	-0.03975	<.0001	4.1329	62.3585	58.0464	66.991	4.0932	59.9314	55.786	64.3848	0	0	1	1	1	-0.0389223
	24		k=No, extraction_date=4 vs extraction_date=5	0.04805	<.0001	4.0932	59.9314	55.786	64.3848	4.1413	62.8845	58.5349	67.5574	0	0	1	1	1	0.0492756
	24		k=No, extraction_date=4 vs extraction_date=6	0.06083	<.0001	4.0932	59.9314	55.786	64.3848	4.154	63.6882	59.2842	68.4195	1	0	1	1	1	0.0626864
	24		k=Vt, extraction_date=2 vs extraction_date=6	0.128	0.0008	3.9803	53.5331	41.1276	69.6805	4.1083	60.8432	46.7987	79.1025	1	1	1	1	2	0.136553	0.136553
	24		k=Vt, extraction_date=4 vs extraction_date=6	0.1133	0.0068	3.995	54.3258	41.7367	70.7123	4.1083	60.8432	46.7987	79.1025	1	0	1	1	1	0.119968
	2		Comparison	Effect size	P-value	LSmean 1	BT 1	95% CI		LSmean 2	BT 2	95% CI		lastExtr6	firstExtr2	1of2extract	2of2extract	Sec2First1	Percchange	PercchangePOS	PerccghangeNEG	An > Dv	An > Dy	An > Em	An > Ev	An > No	An > Vt	Dv > Dy	Dv > Em	Dv > Ev	Dv > No	Dv > Vt	Dy > Em	Dy > Ev	Dy > No	Dy > Vt	Em > Ev	Em > No	Em > Vt	Ev > No	Ev > Vt	No > Vt	An < Dv	An < Dy	An < Em	An < Ev	An < No	An < Vt	Dv < Dy
	2	Caesarean section	k=An vs k=No, extraction_date=2	-0.2439	0.0261	7.6654	2133.25	1847.66	2462.98	7.4215	1671.54	1500.84	1861.66	0	0	1	0	1	-0.216434							-0.216434
	2		k=An vs k=No, extraction_date=3	-0.2488	0.0193	7.6551	2111.39	1828.72	2437.74	7.4064	1646.49	1478.37	1833.72	0	0	1	0	1	-0.220186							-0.220186
	2		k=An vs k=No, extraction_date=4	-0.2489	0.0198	7.611	2020.3	1749.42	2333.12	7.3621	1575.14	1414.26	1754.33	0	0	1	0	1	-0.220342							-0.220342
	2		k=An vs k=No, extraction_date=5	-0.2576	0.0116	7.6544	2109.91	1827.01	2436.61	7.3968	1630.76	1464.31	1816.13	0	0	1	0	1	-0.227096							-0.227096
	2		k=An vs k=No, extraction_date=6	-0.267	0.0065	7.6994	2207.02	1911.11	2548.76	7.4324	1689.86	1517.38	1881.95	1	0	1	0	1	-0.234327							-0.234327
	2		k=Dv vs k=No, extraction_date=2	-0.2638	0.0084	7.6853	2176.12	1864.26	2540.16	7.4215	1671.54	1500.84	1861.66	0	0	1	0	1	-0.231873												-0.231873
	2		k=Dv vs k=No, extraction_date=3	-0.2643	0.008	7.6707	2144.58	1837.23	2503.35	7.4064	1646.49	1478.37	1833.72	0	0	1	0	1	-0.232257												-0.232257
	2		k=Dv vs k=No, extraction_date=4	-0.2636	0.0084	7.6257	2050.22	1756.39	2393.19	7.3621	1575.14	1414.26	1754.33	0	0	1	0	1	-0.231719												-0.231719
	2		k=An, extraction_date=4 vs extraction_date=6	0.08841	<.0001	7.611	2020.3	1749.42	2333.12	7.6994	2207.02	1911.11	2548.76	1	0	1	1	1	0.092425
	2		k=Dv, extraction_date=2 vs extraction_date=5	-0.2031	<.0001	7.6853	2176.12	1864.26	2540.16	7.4822	1776.14	1536.43	2053.25	0	1	1	1	2	-0.183803		-0.183803
	2		k=Dv, extraction_date=2 vs extraction_date=6	-0.1646	<.0001	7.6853	2176.12	1864.26	2540.16	7.5206	1845.67	1596.58	2133.63	1	1	1	1	2	-0.151852		-0.151852
	2		k=Dv, extraction_date=3 vs extraction_date=5	-0.1885	<.0001	7.6707	2144.58	1837.23	2503.35	7.4822	1776.14	1536.43	2053.25	0	0	1	1	1	-0.171799
	2		k=Dv, extraction_date=3 vs extraction_date=6	-0.15	0.0003	7.6707	2144.58	1837.23	2503.35	7.5206	1845.67	1596.58	2133.63	1	0	1	1	1	-0.139378
	2		k=Dv, extraction_date=4 vs extraction_date=5	-0.1435	0.0008	7.6257	2050.22	1756.39	2393.19	7.4822	1776.14	1536.43	2053.25	0	0	1	1	1	-0.133679
	2		k=Ev, extraction_date=2 vs extraction_date=6	0.06495	0.0404	7.4912	1792.2	1567.16	2049.56	7.5561	1912.37	1672.73	2186.35	1	1	1	1	2	0.0670523	0.0670523
	2		k=Ev, extraction_date=3 vs extraction_date=6	0.07785	0.0016	7.4783	1769.23	1547.25	2023.05	7.5561	1912.37	1672.73	2186.35	1	0	1	1	1	0.0809065
	2		k=Ev, extraction_date=4 vs extraction_date=5	0.07605	0.003	7.4354	1694.94	1481.49	1939.13	7.5115	1828.95	1599.2	2091.72	0	0	1	1	1	0.0790705
	2		k=Ev, extraction_date=4 vs extraction_date=6	0.1207	<.0001	7.4354	1694.94	1481.49	1939.13	7.5561	1912.37	1672.73	2186.35	1	0	1	1	1	0.128286
	2		k=No, extraction_date=2 vs extraction_date=4	-0.05938	<.0001	7.4215	1671.54	1500.84	1861.66	7.3621	1575.14	1414.26	1754.33	0	1	1	1	2	-0.0576702		-0.0576702
	2		k=No, extraction_date=3 vs extraction_date=4	-0.04427	0.0105	7.4064	1646.49	1478.37	1833.72	7.3621	1575.14	1414.26	1754.33	0	0	1	1	1	-0.0433331
	2		k=No, extraction_date=4 vs extraction_date=6	0.07028	<.0001	7.3621	1575.14	1414.26	1754.33	7.4324	1689.86	1517.38	1881.95	1	0	1	1	1	0.07283
	6		Comparison	Effect size	P-value	LSmean 1	BT 1	95% CI		LSmean 2	BT 2	95% CI		lastExtr6	firstExtr2	1of2extract	2of2extract	Sec2First1	Percchange	PercchangePOS	PerccghangeNEG	An > Dv	An > Dy	An > Em	An > Ev	An > No	An > Vt	Dv > Dy	Dv > Em	Dv > Ev	Dv > No	Dv > Vt	Dy > Em	Dy > Ev	Dy > No	Dy > Vt	Em > Ev	Em > No	Em > Vt	Ev > No	Ev > Vt	No > Vt	An < Dv	An < Dy	An < Em	An < Ev	An < No	An < Vt	Dv < Dy
	6	EU passport	k=An vs k=Em, extraction_date=2	-0.3164	0.0005	4.2203	68.0539	63.8916	72.4873	3.9038	49.5905	44.0091	55.8798	0	0	1	0	1	-0.271305					-0.271305
	6		k=An vs k=No, extraction_date=2	-0.2095	<.0001	4.2203	68.0539	63.8916	72.4873	4.0108	55.191	53.2288	57.2256	0	0	1	0	1	-0.18901							-0.18901
	6		k=An vs k=Vt, extraction_date=2	-0.2619	0.03	4.2203	68.0539	63.8916	72.4873	3.9584	52.3735	46.277	59.273	0	0	1	0	1	-0.230412								-0.230412
	6		k=An vs k=Em, extraction_date=3	-0.3558	<.0001	4.1946	66.3272	62.2766	70.6412	3.8388	46.4697	41.2395	52.3632	0	0	1	0	1	-0.299387					-0.299387
	6		k=An vs k=No, extraction_date=3	-0.1796	<.0001	4.1946	66.3272	62.2766	70.6412	4.0149	55.4178	53.46	57.4472	0	0	1	0	1	-0.164479							-0.164479
	6		k=An vs k=Em, extraction_date=4	-0.4081	<.0001	4.2047	67.0005	62.9014	71.3667	3.7966	44.5495	39.5354	50.1994	0	0	1	0	1	-0.335088					-0.335088
	6		k=An vs k=No, extraction_date=4	-0.2282	<.0001	4.2047	67.0005	62.9014	71.3667	3.9766	53.3354	51.4532	55.2864	0	0	1	0	1	-0.203955							-0.203955
	6		k=An vs k=No, extraction_date=5	-0.2339	<.0001	4.2557	70.5062	66.1926	75.1008	4.0219	55.807	53.8408	57.8451	0	0	1	0	1	-0.20848							-0.20848
	6		k=An vs k=No, extraction_date=6	-0.2927	<.0001	4.3556	77.9136	73.1497	82.9877	4.0629	58.1427	56.0953	60.2648	1	0	1	0	1	-0.253754							-0.253754
	6		k=An vs k=Vt, extraction_date=6	-0.2933	0.0044	4.3556	77.9136	73.1497	82.9877	4.0623	58.1078	51.3439	65.7628	1	0	1	0	1	-0.254202								-0.254202
	6		k=Dv vs k=Em, extraction_date=2	-0.2892	0.0057	4.193	66.2212	62.3039	70.3847	3.9038	49.5905	44.0091	55.8798	0	0	1	0	1	-0.251138										-0.251138
	6		k=Dv vs k=No, extraction_date=2	-0.1822	<.0001	4.193	66.2212	62.3039	70.3847	4.0108	55.191	53.2288	57.2256	0	0	1	0	1	-0.166565												-0.166565
	6		k=Dv vs k=Em, extraction_date=3	-0.382	<.0001	4.2208	68.0879	64.0502	72.3802	3.8388	46.4697	41.2395	52.3632	0	0	1	0	1	-0.317505										-0.317505
	6		k=Dv vs k=No, extraction_date=3	-0.2059	<.0001	4.2208	68.0879	64.0502	72.3802	4.0149	55.4178	53.46	57.4472	0	0	1	0	1	-0.186086												-0.186086
	6		k=Dv vs k=Em, extraction_date=4	-0.3784	<.0001	4.1751	65.0463	61.189	69.1468	3.7966	44.5495	39.5354	50.1994	0	0	1	0	1	-0.315112										-0.315112
	6		k=Dv vs k=No, extraction_date=4	-0.1985	<.0001	4.1751	65.0463	61.189	69.1468	3.9766	53.3354	51.4532	55.2864	0	0	1	0	1	-0.18004												-0.18004
	6		k=Dv vs k=No, extraction_date=5	-0.1785	<.0001	4.2003	66.7063	62.7383	70.9254	4.0219	55.807	53.8408	57.8451	0	0	1	0	1	-0.163392												-0.163392
	6		k=Dv vs k=No, extraction_date=6	-0.1759	<.0001	4.2388	69.3246	65.2008	73.7093	4.0629	58.1427	56.0953	60.2648	1	0	1	0	1	-0.161298												-0.161298
	6		k=Dy vs k=No, extraction_date=5	-0.3627	0.0007	4.3846	80.2061	68.9706	93.272	4.0219	55.807	53.8408	57.8451	0	0	1	0	1	-0.304205																-0.304205
	6		k=Dy vs k=Vt, extraction_date=5	-0.3734	0.0331	4.3846	80.2061	68.9706	93.272	4.0111	55.2076	48.7812	62.4805	0	0	1	0	1	-0.311679																	-0.311679
	6		k=Dy vs k=Em, extraction_date=6	-0.3644	0.0343	4.5108	90.9946	78.1267	105.982	4.1464	63.206	56.0922	71.2221	1	0	1	0	1	-0.305387														-0.305387
	6		k=Dy vs k=No, extraction_date=6	-0.4479	<.0001	4.5108	90.9946	78.1267	105.982	4.0629	58.1427	56.0953	60.2648	1	0	1	0	1	-0.361031																-0.361031
	6		k=Dy vs k=Vt, extraction_date=6	-0.4485	0.0014	4.5108	90.9946	78.1267	105.982	4.0623	58.1078	51.3439	65.7628	1	0	1	0	1	-0.361415																	-0.361415
	6		k=Em vs k=Ev, extraction_date=3	0.2842	0.0021	3.8388	46.4697	41.2395	52.3632	4.1229	61.738	58.915	64.6964	0	0	1	0	1	0.328566
	6		k=Em vs k=Ev, extraction_date=4	0.2848	0.002	3.7966	44.5495	39.5354	50.1994	4.0815	59.2343	56.529	62.069	0	0	1	0	1	0.329629
	6		k=Ev vs k=No, extraction_date=2	-0.1278	0.0002	4.1386	62.715	59.8449	65.7227	4.0108	55.191	53.2288	57.2256	0	0	1	0	1	-0.119971																					-0.119971
	6		k=Ev vs k=No, extraction_date=3	-0.108	0.0077	4.1229	61.738	58.915	64.6964	4.0149	55.4178	53.46	57.4472	0	0	1	0	1	-0.102372																					-0.102372
	6		k=Ev vs k=No, extraction_date=4	-0.1049	0.0123	4.0815	59.2343	56.529	62.069	3.9766	53.3354	51.4532	55.2864	0	0	1	0	1	-0.0995854																					-0.0995854
	6		k=Ev vs k=No, extraction_date=5	-0.1891	<.0001	4.2109	67.4172	64.3458	70.6352	4.0219	55.807	53.8408	57.8451	0	0	1	0	1	-0.172213																					-0.172213
	6		k=Ev vs k=No, extraction_date=6	-0.2184	<.0001	4.2813	72.3344	69.0444	75.7812	4.0629	58.1427	56.0953	60.2648	1	0	1	0	1	-0.196196																					-0.196196
	6		k=An, extraction_date=2 vs extraction_date=6	0.1354	<.0001	4.2203	68.0539	63.8916	72.4873	4.3556	77.9136	73.1497	82.9877	1	1	1	1	2	0.14488	0.14488
	6		k=An, extraction_date=3 vs extraction_date=5	0.06113	0.0058	4.1946	66.3272	62.2766	70.6412	4.2557	70.5062	66.1926	75.1008	0	0	1	1	1	0.0630052
	6		k=An, extraction_date=3 vs extraction_date=6	0.1611	<.0001	4.1946	66.3272	62.2766	70.6412	4.3556	77.9136	73.1497	82.9877	1	0	1	1	1	0.174685
	6		k=An, extraction_date=4 vs extraction_date=6	0.1509	<.0001	4.2047	67.0005	62.9014	71.3667	4.3556	77.9136	73.1497	82.9877	1	0	1	1	1	0.16288
	6		k=An, extraction_date=5 vs extraction_date=6	0.09992	<.0001	4.2557	70.5062	66.1926	75.1008	4.3556	77.9136	73.1497	82.9877	1	0	1	1	1	0.10506
	6		k=Dv, extraction_date=2 vs extraction_date=6	0.04579	0.0227	4.193	66.2212	62.3039	70.3847	4.2388	69.3246	65.2008	73.7093	1	1	1	1	2	0.046865	0.046865
	6		k=Dv, extraction_date=3 vs extraction_date=4	-0.04571	0.0154	4.2208	68.0879	64.0502	72.3802	4.1751	65.0463	61.189	69.1468	0	0	1	1	1	-0.0446715
	6		k=Dv, extraction_date=4 vs extraction_date=6	0.06373	<.0001	4.1751	65.0463	61.189	69.1468	4.2388	69.3246	65.2008	73.7093	1	0	1	1	1	0.0657726
	6		k=Dy, extraction_date=2 vs extraction_date=5	0.2479	<.0001	4.1367	62.5959	53.8273	72.793	4.3846	80.2061	68.9706	93.272	0	1	1	1	2	0.281332	0.281332
	6		k=Dy, extraction_date=2 vs extraction_date=6	0.3741	<.0001	4.1367	62.5959	53.8273	72.793	4.5108	90.9946	78.1267	105.982	1	1	1	1	2	0.453683	0.453683
	6		k=Dy, extraction_date=3 vs extraction_date=5	0.3129	<.0001	4.0716	58.6507	50.4347	68.2051	4.3846	80.2061	68.9706	93.272	0	0	1	1	1	0.367522
	6		k=Dy, extraction_date=3 vs extraction_date=6	0.4392	<.0001	4.0716	58.6507	50.4347	68.2051	4.5108	90.9946	78.1267	105.982	1	0	1	1	1	0.551466
	6		k=Dy, extraction_date=4 vs extraction_date=5	0.3551	<.0001	4.0295	56.2328	48.3555	65.3933	4.3846	80.2061	68.9706	93.272	0	0	1	1	1	0.426323
	6		k=Dy, extraction_date=4 vs extraction_date=6	0.4813	<.0001	4.0295	56.2328	48.3555	65.3933	4.5108	90.9946	78.1267	105.982	1	0	1	1	1	0.618177
	6		k=Em, extraction_date=2 vs extraction_date=4	-0.1072	0.0105	3.9038	49.5905	44.0091	55.8798	3.7966	44.5495	39.5354	50.1994	0	1	1	1	2	-0.101654		-0.101654
	6		k=Em, extraction_date=2 vs extraction_date=5	0.2777	<.0001	3.9038	49.5905	44.0091	55.8798	4.1815	65.464	58.096	73.7664	0	1	1	1	2	0.32009	0.32009
	6		k=Em, extraction_date=2 vs extraction_date=6	0.2426	<.0001	3.9038	49.5905	44.0091	55.8798	4.1464	63.206	56.0922	71.2221	1	1	1	1	2	0.274559	0.274559
	6		k=Em, extraction_date=3 vs extraction_date=5	0.3427	<.0001	3.8388	46.4697	41.2395	52.3632	4.1815	65.464	58.096	73.7664	0	0	1	1	1	0.408746
	6		k=Em, extraction_date=3 vs extraction_date=6	0.3076	<.0001	3.8388	46.4697	41.2395	52.3632	4.1464	63.206	56.0922	71.2221	1	0	1	1	1	0.360157
	6		k=Em, extraction_date=4 vs extraction_date=5	0.3848	<.0001	3.7966	44.5495	39.5354	50.1994	4.1815	65.464	58.096	73.7664	0	0	1	1	1	0.469467
	6		k=Em, extraction_date=4 vs extraction_date=6	0.3498	<.0001	3.7966	44.5495	39.5354	50.1994	4.1464	63.206	56.0922	71.2221	1	0	1	1	1	0.418784
	6		k=Ev, extraction_date=2 vs extraction_date=4	-0.05713	<.0001	4.1386	62.715	59.8449	65.7227	4.0815	59.2343	56.529	62.069	0	1	1	1	2	-0.0555004		-0.0555004
	6		k=Ev, extraction_date=2 vs extraction_date=5	0.07231	<.0001	4.1386	62.715	59.8449	65.7227	4.2109	67.4172	64.3458	70.6352	0	1	1	1	2	0.0749778	0.0749778
	6		k=Ev, extraction_date=2 vs extraction_date=6	0.1427	<.0001	4.1386	62.715	59.8449	65.7227	4.2813	72.3344	69.0444	75.7812	1	1	1	1	2	0.153384	0.153384
	6		k=Ev, extraction_date=3 vs extraction_date=4	-0.04145	0.0138	4.1229	61.738	58.915	64.6964	4.0815	59.2343	56.529	62.069	0	0	1	1	1	-0.0405547
	6		k=Ev, extraction_date=3 vs extraction_date=5	0.088	<.0001	4.1229	61.738	58.915	64.6964	4.2109	67.4172	64.3458	70.6352	0	0	1	1	1	0.0919881
	6		k=Ev, extraction_date=3 vs extraction_date=6	0.1584	<.0001	4.1229	61.738	58.915	64.6964	4.2813	72.3344	69.0444	75.7812	1	0	1	1	1	0.171635
	6		k=Ev, extraction_date=4 vs extraction_date=5	0.1294	<.0001	4.0815	59.2343	56.529	62.069	4.2109	67.4172	64.3458	70.6352	0	0	1	1	1	0.138145
	6		k=Ev, extraction_date=4 vs extraction_date=6	0.1998	<.0001	4.0815	59.2343	56.529	62.069	4.2813	72.3344	69.0444	75.7812	1	0	1	1	1	0.221159
	6		k=Ev, extraction_date=5 vs extraction_date=6	0.07038	<.0001	4.2109	67.4172	64.3458	70.6352	4.2813	72.3344	69.0444	75.7812	1	0	1	1	1	0.0729373
	6		k=No, extraction_date=2 vs extraction_date=4	-0.0342	<.0001	4.0108	55.191	53.2288	57.2256	3.9766	53.3354	51.4532	55.2864	0	1	1	1	2	-0.0336218		-0.0336218
	6		k=No, extraction_date=2 vs extraction_date=6	0.05212	<.0001	4.0108	55.191	53.2288	57.2256	4.0629	58.1427	56.0953	60.2648	1	1	1	1	2	0.0534811	0.0534811
	6		k=No, extraction_date=3 vs extraction_date=4	-0.03835	<.0001	4.0149	55.4178	53.46	57.4472	3.9766	53.3354	51.4532	55.2864	0	0	1	1	1	-0.0375758
	6		k=No, extraction_date=3 vs extraction_date=6	0.04796	<.0001	4.0149	55.4178	53.46	57.4472	4.0629	58.1427	56.0953	60.2648	1	0	1	1	1	0.0491707
	6		k=No, extraction_date=4 vs extraction_date=5	0.04527	<.0001	3.9766	53.3354	51.4532	55.2864	4.0219	55.807	53.8408	57.8451	0	0	1	1	1	0.0463417
	6		k=No, extraction_date=4 vs extraction_date=6	0.08631	<.0001	3.9766	53.3354	51.4532	55.2864	4.0629	58.1427	56.0953	60.2648	1	0	1	1	1	0.0901333
	6		k=No, extraction_date=5 vs extraction_date=6	0.04104	<.0001	4.0219	55.807	53.8408	57.8451	4.0629	58.1427	56.0953	60.2648	1	0	1	1	1	0.0418521
	6		k=Vt, extraction_date=2 vs extraction_date=6	0.1039	0.0342	3.9584	52.3735	46.277	59.273	4.0623	58.1078	51.3439	65.7628	1	1	1	1	2	0.10949	0.10949
	21		Comparison	Effect size	P-value	LSmean 1	BT 1	95% CI		LSmean 2	BT 2	95% CI		lastExtr6	firstExtr2	1of2extract	2of2extract	Sec2First1	Percchange	PercchangePOS	PerccghangeNEG	An > Dv	An > Dy	An > Em	An > Ev	An > No	An > Vt	Dv > Dy	Dv > Em	Dv > Ev	Dv > No	Dv > Vt	Dy > Em	Dy > Ev	Dy > No	Dy > Vt	Em > Ev	Em > No	Em > Vt	Ev > No	Ev > Vt	No > Vt	An < Dv	An < Dy	An < Em	An < Ev	An < No	An < Vt	Dv < Dy
	21	Euthanasia	k=An vs k=No, extraction_date=6	-0.2869	0.0047	4.9564	142.081	124.433	162.233	4.6695	106.644	101.473	112.079	1	0	1	0	1	-0.249413							-0.249413
	21		k=An vs k=Vt, extraction_date=6	-0.4699	0.0053	4.9564	142.081	124.433	162.233	4.4865	88.8101	73.7161	106.995	1	0	1	0	1	-0.374935								-0.374935
	21		k=Dv vs k=No, extraction_date=2	-0.3063	<.0001	4.9226	137.359	126.887	148.696	4.6164	101.129	96.1859	106.327	0	0	1	0	1	-0.263761												-0.263761
	21		k=Dv vs k=Vt, extraction_date=2	-0.4841	0.0002	4.9226	137.359	126.887	148.696	4.4385	84.6479	70.2035	102.064	0	0	1	0	1	-0.383748													-0.383748
	21		k=Dv vs k=Dy, extraction_date=3	-0.4959	0.0021	4.9567	142.124	131.276	153.869	4.4608	86.5567	71.0392	105.464	0	0	1	0	1	-0.390977									-0.390977
	21		k=Dv vs k=Ev, extraction_date=3	-0.2102	0.0284	4.9567	142.124	131.276	153.869	4.7465	115.18	106.625	124.423	0	0	1	0	1	-0.189578											-0.189578
	21		k=Dv vs k=No, extraction_date=3	-0.3276	<.0001	4.9567	142.124	131.276	153.869	4.629	102.412	97.4246	107.654	0	0	1	0	1	-0.279421												-0.279421
	21		k=Dv vs k=Vt, extraction_date=3	-0.4886	0.0001	4.9567	142.124	131.276	153.869	4.4681	87.1909	72.4176	104.978	0	0	1	0	1	-0.386515													-0.386515
	21		k=Dv vs k=Dy, extraction_date=4	-0.4923	0.0024	4.911	135.775	125.412	146.995	4.4187	82.9883	68.1105	101.116	0	0	1	0	1	-0.388781									-0.388781
	21		k=Dv vs k=Ev, extraction_date=4	-0.2082	0.0326	4.911	135.775	125.412	146.995	4.7027	110.244	102.055	119.091	0	0	1	0	1	-0.188037											-0.188037
	21		k=Dv vs k=No, extraction_date=4	-0.317	<.0001	4.911	135.775	125.412	146.995	4.5939	98.8793	94.0662	103.939	0	0	1	0	1	-0.271742												-0.271742
	21		k=Dv vs k=Vt, extraction_date=4	-0.4879	0.0001	4.911	135.775	125.412	146.995	4.423	83.3459	69.2241	100.349	0	0	1	0	1	-0.386147													-0.386147
	21		k=Dv vs k=No, extraction_date=5	-0.3005	<.0001	4.9366	139.296	128.648	150.825	4.636	103.131	98.1205	108.397	0	0	1	0	1	-0.259626												-0.259626
	21		k=Dv vs k=Vt, extraction_date=5	-0.4902	0.0001	4.9366	139.296	128.648	150.825	4.4464	85.3192	70.863	102.725	0	0	1	0	1	-0.387496													-0.387496
	21		k=Dv vs k=No, extraction_date=6	-0.3055	<.0001	4.975	144.749	133.685	156.729	4.6695	106.644	101.473	112.079	1	0	1	0	1	-0.263245												-0.263245
	21		k=Dv vs k=Vt, extraction_date=6	-0.4885	0.0001	4.975	144.749	133.685	156.729	4.4865	88.8101	73.7161	106.995	1	0	1	0	1	-0.386454													-0.386454
	21		k=Dy vs k=Vt, extraction_date=6	-0.5652	0.0125	5.0517	156.288	128.144	190.614	4.4865	88.8101	73.7161	106.995	1	0	1	0	1	-0.431754																	-0.431754
	21		k=Ev vs k=No, extraction_date=5	-0.2554	<.0001	4.8914	133.14	123.294	143.772	4.636	103.131	98.1205	108.397	0	0	1	0	1	-0.225393																					-0.225393
	21		k=Ev vs k=Vt, extraction_date=5	-0.4451	0.0024	4.8914	133.14	123.294	143.772	4.4464	85.3192	70.863	102.725	0	0	1	0	1	-0.359176																						-0.359176
	21		k=Ev vs k=No, extraction_date=6	-0.2818	<.0001	4.9512	141.344	130.884	152.641	4.6695	106.644	101.473	112.079	1	0	1	0	1	-0.2455																					-0.2455
	21		k=Ev vs k=Vt, extraction_date=6	-0.4647	0.0011	4.9512	141.344	130.884	152.641	4.4865	88.8101	73.7161	106.995	1	0	1	0	1	-0.371676																						-0.371676
	21		k=An, extraction_date=2 vs extraction_date=6	0.1465	<.0001	4.8099	122.719	107.503	140.089	4.9564	142.081	124.433	162.233	1	1	1	1	2	0.157775	0.157775
	21		k=An, extraction_date=3 vs extraction_date=6	0.1611	<.0001	4.7954	120.953	105.956	138.072	4.9564	142.081	124.433	162.233	1	0	1	1	1	0.174685
	21		k=An, extraction_date=4 vs extraction_date=6	0.1629	<.0001	4.7935	120.723	105.686	137.9	4.9564	142.081	124.433	162.233	1	0	1	1	1	0.176919
	21		k=An, extraction_date=5 vs extraction_date=6	0.1373	<.0001	4.8191	123.854	108.469	141.42	4.9564	142.081	124.433	162.233	1	0	1	1	1	0.147172
	21		k=Dv, extraction_date=2 vs extraction_date=6	0.05238	0.0003	4.9226	137.359	126.887	148.696	4.975	144.749	133.685	156.729	1	1	1	1	2	0.0537972	0.0537972
	21		k=Dv, extraction_date=3 vs extraction_date=4	-0.0457	0.0029	4.9567	142.124	131.276	153.869	4.911	135.775	125.412	146.995	0	0	1	1	1	-0.0446715
	21		k=Dv, extraction_date=4 vs extraction_date=6	0.06405	<.0001	4.911	135.775	125.412	146.995	4.975	144.749	133.685	156.729	1	0	1	1	1	0.0660924
	21		k=Dy, extraction_date=2 vs extraction_date=5	0.1305	0.007	4.5248	92.2775	75.8235	112.302	4.6552	105.13	86.2829	128.094	0	1	1	1	2	0.139284	0.139284
	21		k=Dy, extraction_date=2 vs extraction_date=6	0.527	<.0001	4.5248	92.2775	75.8235	112.302	5.0517	156.288	128.144	190.614	1	1	1	1	2	0.693674	0.693674
	21		k=Dy, extraction_date=3 vs extraction_date=5	0.1944	<.0001	4.4608	86.5567	71.0392	105.464	4.6552	105.13	86.2829	128.094	0	0	1	1	1	0.214582
	21		k=Dy, extraction_date=3 vs extraction_date=6	0.5909	<.0001	4.4608	86.5567	71.0392	105.464	5.0517	156.288	128.144	190.614	1	0	1	1	1	0.805613
	21		k=Dy, extraction_date=4 vs extraction_date=5	0.2366	<.0001	4.4187	82.9883	68.1105	101.116	4.6552	105.13	86.2829	128.094	0	0	1	1	1	0.266808
	21		k=Dy, extraction_date=4 vs extraction_date=6	0.6331	<.0001	4.4187	82.9883	68.1105	101.116	5.0517	156.288	128.144	190.614	1	0	1	1	1	0.883252
	21		k=Dy, extraction_date=5 vs extraction_date=6	0.3965	<.0001	4.6552	105.13	86.2829	128.094	5.0517	156.288	128.144	190.614	1	0	1	1	1	0.486612
	21		k=Ev, extraction_date=2 vs extraction_date=4	-0.06979	<.0001	4.7725	118.214	109.427	127.708	4.7027	110.244	102.055	119.091	0	1	1	1	2	-0.0674197		-0.0674197
	21		k=Ev, extraction_date=2 vs extraction_date=5	0.1189	<.0001	4.7725	118.214	109.427	127.708	4.8914	133.14	123.294	143.772	0	1	1	1	2	0.126257	0.126257
	21		k=Ev, extraction_date=2 vs extraction_date=6	0.1787	<.0001	4.7725	118.214	109.427	127.708	4.9512	141.344	130.884	152.641	1	1	1	1	2	0.195662	0.195662
	21		k=Ev, extraction_date=3 vs extraction_date=5	0.145	<.0001	4.7465	115.18	106.625	124.423	4.8914	133.14	123.294	143.772	0	0	1	1	1	0.155924
	21		k=Ev, extraction_date=3 vs extraction_date=6	0.2048	<.0001	4.7465	115.18	106.625	124.423	4.9512	141.344	130.884	152.641	1	0	1	1	1	0.227157
	21		k=Ev, extraction_date=4 vs extraction_date=5	0.1887	<.0001	4.7027	110.244	102.055	119.091	4.8914	133.14	123.294	143.772	0	0	1	1	1	0.207679
	21		k=Ev, extraction_date=4 vs extraction_date=6	0.2485	<.0001	4.7027	110.244	102.055	119.091	4.9512	141.344	130.884	152.641	1	0	1	1	1	0.282101
	21		k=Ev, extraction_date=5 vs extraction_date=6	0.05981	0.0002	4.8914	133.14	123.294	143.772	4.9512	141.344	130.884	152.641	1	0	1	1	1	0.0616242
	21		k=No, extraction_date=2 vs extraction_date=6	0.05312	<.0001	4.6164	101.129	96.1859	106.327	4.6695	106.644	101.473	112.079	1	1	1	1	2	0.0545351	0.0545351
	21		k=No, extraction_date=3 vs extraction_date=4	-0.03508	0.0002	4.629	102.412	97.4246	107.654	4.5939	98.8793	94.0662	103.939	0	0	1	1	1	-0.0344911
	21		k=No, extraction_date=3 vs extraction_date=6	0.04047	<.0001	4.629	102.412	97.4246	107.654	4.6695	106.644	101.473	112.079	1	0	1	1	1	0.0413313
	21		k=No, extraction_date=4 vs extraction_date=5	0.04209	<.0001	4.5939	98.8793	94.0662	103.939	4.636	103.131	98.1205	108.397	0	0	1	1	1	0.0429988
	21		k=No, extraction_date=4 vs extraction_date=6	0.07554	<.0001	4.5939	98.8793	94.0662	103.939	4.6695	106.644	101.473	112.079	1	0	1	1	1	0.0785311
	21		k=No, extraction_date=5 vs extraction_date=6	0.03345	0.0002	4.636	103.131	98.1205	108.397	4.6695	106.644	101.473	112.079	1	0	1	1	1	0.0340674
	7		Comparison	Effect size	P-value	LSmean 1	BT 1	95% CI		LSmean 2	BT 2	95% CI		lastExtr6	firstExtr2	1of2extract	2of2extract	Sec2First1	Percchange	PercchangePOS	PerccghangeNEG	An > Dv	An > Dy	An > Em	An > Ev	An > No	An > Vt	Dv > Dy	Dv > Em	Dv > Ev	Dv > No	Dv > Vt	Dy > Em	Dy > Ev	Dy > No	Dy > Vt	Em > Ev	Em > No	Em > Vt	Ev > No	Ev > Vt	No > Vt	An < Dv	An < Dy	An < Em	An < Ev	An < No	An < Vt	Dv < Dy
	7	Euthanasia	k=Dy vs k=No, extraction_date=6	-0.4878	<.0001	5.4393	230.281	190.918	277.759	4.9515	141.387	133.094	150.197	1	0	1	0	1	-0.386024																-0.386024
	7		k=Dy vs k=Vt, extraction_date=6	-0.5867	0.0008	5.4393	230.281	190.918	277.759	4.8526	128.073	107.794	152.168	1	0	1	0	1	-0.44384																	-0.44384
	7		k=Ev vs k=No, extraction_date=5	-0.2518	<.0001	5.175	176.797	163.068	191.681	4.9232	137.442	129.37	146.017	0	0	1	0	1	-0.2226																					-0.2226
	7		k=Ev vs k=Vt, extraction_date=5	-0.3625	0.0109	5.175	176.797	163.068	191.681	4.8125	123.039	103.632	146.08	0	0	1	0	1	-0.304066																						-0.304066
	7		k=Ev vs k=No, extraction_date=6	-0.3013	<.0001	5.2527	191.081	176.247	207.164	4.9515	141.387	133.094	150.197	1	0	1	0	1	-0.26007																					-0.26007
	7		k=Ev vs k=Vt, extraction_date=6	-0.4001	0.0019	5.2527	191.081	176.247	207.164	4.8526	128.073	107.794	152.168	1	0	1	0	1	-0.329747																						-0.329747
	7		k=An, extraction_date=2 vs extraction_date=6	0.1826	<.0001	4.9294	138.297	121.653	157.216	5.112	166.002	146.033	188.701	1	1	1	1	2	0.200334	0.200334
	7		k=An, extraction_date=3 vs extraction_date=6	0.1972	<.0001	4.9148	136.292	119.89	154.938	5.112	166.002	146.033	188.701	1	0	1	1	1	0.217988
	7		k=An, extraction_date=4 vs extraction_date=6	0.1808	<.0001	4.9312	138.546	121.825	157.561	5.112	166.002	146.033	188.701	1	0	1	1	1	0.198176
	7		k=An, extraction_date=5 vs extraction_date=6	0.155	<.0001	4.9571	142.181	125.021	161.696	5.112	166.002	146.033	188.701	1	0	1	1	1	0.167541
	7		k=Dv, extraction_date=2 vs extraction_date=6	0.05235	0.0005	5.2152	184.049	153.005	221.391	5.2676	193.95	161.22	233.324	1	1	1	1	2	0.0537972	0.0537972
	7		k=Dv, extraction_date=3 vs extraction_date=4	-0.04632	0.0039	5.2503	190.623	158.465	229.309	5.204	181.999	151.295	218.934	0	0	1	1	1	-0.0452445
	7		k=Dv, extraction_date=4 vs extraction_date=6	0.0636	<.0001	5.204	181.999	151.295	218.934	5.2676	193.95	161.22	233.324	1	0	1	1	1	0.065666
	7		k=Dy, extraction_date=2 vs extraction_date=6	0.4167	<.0001	5.0226	151.805	126.178	182.638	5.4393	230.281	190.918	277.759	1	1	1	1	2	0.516947	0.516947
	7		k=Dy, extraction_date=3 vs extraction_date=6	0.4797	<.0001	4.9596	142.537	118.307	171.729	5.4393	230.281	190.918	277.759	1	0	1	1	1	0.61559
	7		k=Dy, extraction_date=4 vs extraction_date=5	0.1578	0.0003	4.9169	136.579	113.362	164.551	5.0747	159.924	132.739	192.677	0	0	1	1	1	0.170932
	7		k=Dy, extraction_date=4 vs extraction_date=6	0.5224	<.0001	4.9169	136.579	113.362	164.551	5.4393	230.281	190.918	277.759	1	0	1	1	1	0.686069
	7		k=Dy, extraction_date=5 vs extraction_date=6	0.3646	<.0001	5.0747	159.924	132.739	192.677	5.4393	230.281	190.918	277.759	1	0	1	1	1	0.439938
	7		k=Ev, extraction_date=2 vs extraction_date=4	-0.07513	<.0001	5.0631	158.08	145.776	171.422	4.9879	146.628	135.2	159.022	0	1	1	1	2	-0.072442		-0.072442
	7		k=Ev, extraction_date=2 vs extraction_date=5	0.1119	<.0001	5.0631	158.08	145.776	171.422	5.175	176.797	163.068	191.681	0	1	1	1	2	0.118401	0.118401
	7		k=Ev, extraction_date=2 vs extraction_date=6	0.1896	<.0001	5.0631	158.08	145.776	171.422	5.2527	191.081	176.247	207.164	1	1	1	1	2	0.208766	0.208766
	7		k=Ev, extraction_date=3 vs extraction_date=5	0.1436	<.0001	5.0314	153.147	141.236	166.063	5.175	176.797	163.068	191.681	0	0	1	1	1	0.154422
	7		k=Ev, extraction_date=3 vs extraction_date=6	0.2213	<.0001	5.0314	153.147	141.236	166.063	5.2527	191.081	176.247	207.164	1	0	1	1	1	0.247698
	7		k=Ev, extraction_date=4 vs extraction_date=5	0.187	<.0001	4.9879	146.628	135.2	159.022	5.175	176.797	163.068	191.681	0	0	1	1	1	0.205748
	7		k=Ev, extraction_date=4 vs extraction_date=6	0.2648	<.0001	4.9879	146.628	135.2	159.022	5.2527	191.081	176.247	207.164	1	0	1	1	1	0.30317
	7		k=Ev, extraction_date=5 vs extraction_date=6	0.07775	<.0001	5.175	176.797	163.068	191.681	5.2527	191.081	176.247	207.164	1	0	1	1	1	0.0807984
	7		k=No, extraction_date=2 vs extraction_date=4	-0.03072	0.0125	4.9143	136.224	128.196	144.755	4.8836	132.105	124.34	140.356	0	1	1	1	2	-0.0302335		-0.0302335
	7		k=No, extraction_date=2 vs extraction_date=6	0.03715	0.0003	4.9143	136.224	128.196	144.755	4.9515	141.387	133.094	150.197	1	1	1	1	2	0.0379006	0.0379006
	7		k=No, extraction_date=3 vs extraction_date=4	-0.03804	<.0001	4.9216	137.222	129.153	145.795	4.8836	132.105	124.34	140.356	0	0	1	1	1	-0.0372871
	7		k=No, extraction_date=3 vs extraction_date=6	0.02983	0.0101	4.9216	137.222	129.153	145.795	4.9515	141.387	133.094	150.197	1	0	1	1	1	0.0303515
	7		k=No, extraction_date=4 vs extraction_date=5	0.03962	<.0001	4.8836	132.105	124.34	140.356	4.9232	137.442	129.37	146.017	0	0	1	1	1	0.0403945
	7		k=No, extraction_date=4 vs extraction_date=6	0.06787	<.0001	4.8836	132.105	124.34	140.356	4.9515	141.387	133.094	150.197	1	0	1	1	1	0.0702583
	7		k=No, extraction_date=5 vs extraction_date=6	0.02825	0.0154	4.9232	137.442	129.37	146.017	4.9515	141.387	133.094	150.197	1	0	1	1	1	0.0287042
	10		Comparison	Effect size	P-value	LSmean 1	BT 1	95% CI		LSmean 2	BT 2	95% CI		lastExtr6	firstExtr2	1of2extract	2of2extract	Sec2First1	Percchange	PercchangePOS	PerccghangeNEG	An > Dv	An > Dy	An > Em	An > Ev	An > No	An > Vt	Dv > Dy	Dv > Em	Dv > Ev	Dv > No	Dv > Vt	Dy > Em	Dy > Ev	Dy > No	Dy > Vt	Em > Ev	Em > No	Em > Vt	Ev > No	Ev > Vt	No > Vt	An < Dv	An < Dy	An < Em	An < Ev	An < No	An < Vt	Dv < Dy
	10	Ophthal exam cert	k=An vs k=No, extraction_date=2	-0.1547	0.0006	4.7335	113.693	107.417	120.335	4.5788	97.3974	93.265	101.713	0	0	1	0	1	-0.143328							-0.143328
	10		k=An vs k=No, extraction_date=3	-0.1304	0.0104	4.7179	111.933	105.754	118.473	4.5875	98.2485	94.1408	102.535	0	0	1	0	1	-0.122256							-0.122256
	10		k=An vs k=No, extraction_date=4	-0.1596	0.0003	4.7077	110.797	104.679	117.273	4.5481	94.4528	90.4789	98.6011	0	0	1	0	1	-0.147515							-0.147515
	10		k=An vs k=No, extraction_date=5	-0.1474	0.0015	4.7387	114.286	107.975	120.965	4.5914	98.6324	94.4716	102.976	0	0	1	0	1	-0.136965							-0.136965
	10		k=An vs k=No, extraction_date=6	-0.233	<.0001	4.8507	127.83	120.795	135.274	4.6177	101.261	97.0234	105.683	1	0	1	0	1	-0.207846							-0.207846
	10		k=Ev vs k=No, extraction_date=5	-0.2367	<.0001	4.828	124.961	116.056	134.549	4.5914	98.6324	94.4716	102.976	0	0	1	0	1	-0.210693																					-0.210693
	10		k=Ev vs k=No, extraction_date=6	-0.2327	<.0001	4.8505	127.804	118.696	137.611	4.6177	101.261	97.0234	105.683	1	0	1	0	1	-0.207688																					-0.207688
	10		k=An, extraction_date=2 vs extraction_date=6	0.1172	<.0001	4.7335	113.693	107.417	120.335	4.8507	127.83	120.795	135.274	1	1	1	1	2	0.124344	0.124344
	10		k=An, extraction_date=3 vs extraction_date=6	0.1328	<.0001	4.7179	111.933	105.754	118.473	4.8507	127.83	120.795	135.274	1	0	1	1	1	0.142022
	10		k=An, extraction_date=4 vs extraction_date=6	0.143	<.0001	4.7077	110.797	104.679	117.273	4.8507	127.83	120.795	135.274	1	0	1	1	1	0.15373
	10		k=An, extraction_date=5 vs extraction_date=6	0.112	<.0001	4.7387	114.286	107.975	120.965	4.8507	127.83	120.795	135.274	1	0	1	1	1	0.118513
	10		k=Ev, extraction_date=2 vs extraction_date=5	0.1307	<.0001	4.6974	109.662	101.749	118.19	4.828	124.961	116.056	134.549	0	1	1	1	2	0.139512	0.139512
	10		k=Ev, extraction_date=2 vs extraction_date=6	0.1531	<.0001	4.6974	109.662	101.749	118.19	4.8505	127.804	118.696	137.611	1	1	1	1	2	0.165442	0.165442
	10		k=Ev, extraction_date=3 vs extraction_date=5	0.1311	<.0001	4.697	109.618	101.708	118.143	4.828	124.961	116.056	134.549	0	0	1	1	1	0.139968
	10		k=Ev, extraction_date=3 vs extraction_date=6	0.1535	<.0001	4.697	109.618	101.708	118.143	4.8505	127.804	118.696	137.611	1	0	1	1	1	0.165908
	10		k=Ev, extraction_date=4 vs extraction_date=5	0.175	<.0001	4.653	104.899	97.3301	113.057	4.828	124.961	116.056	134.549	0	0	1	1	1	0.191246
	10		k=Ev, extraction_date=4 vs extraction_date=6	0.1974	<.0001	4.653	104.899	97.3301	113.057	4.8505	127.804	118.696	137.611	1	0	1	1	1	0.218353
	10		k=No, extraction_date=4 vs extraction_date=6	0.06961	<.0001	4.5481	94.4528	90.4789	98.6011	4.6177	101.261	97.0234	105.683	1	0	1	1	1	0.0720793
	12		Comparison	Effect size	P-value	LSmean 1	BT 1	95% CI		LSmean 2	BT 2	95% CI		lastExtr6	firstExtr2	1of2extract	2of2extract	Sec2First1	Percchange	PercchangePOS	PerccghangeNEG	An > Dv	An > Dy	An > Em	An > Ev	An > No	An > Vt	Dv > Dy	Dv > Em	Dv > Ev	Dv > No	Dv > Vt	Dy > Em	Dy > Ev	Dy > No	Dy > Vt	Em > Ev	Em > No	Em > Vt	Ev > No	Ev > Vt	No > Vt	An < Dv	An < Dy	An < Em	An < Ev	An < No	An < Vt	Dv < Dy
	12	Pyometra	k=Dv vs k=No, extraction_date=5	-0.2828	0.0009	7.7314	2278.79	1950.41	2662.46	7.4486	1717.46	1526.79	1931.94	0	0	1	0	1	-0.246329												-0.246329
	12		k=Dv vs k=No, extraction_date=6	-0.245	0.0111	7.7699	2368.23	2026.97	2766.96	7.5248	1853.44	1647.84	2084.7	1	0	1	0	1	-0.217374												-0.217374
	12		k=Dv, extraction_date=2 vs extraction_date=5	0.4111	0.001	7.3203	1510.66	1202.03	1898.53	7.7314	2278.79	1950.41	2662.46	0	1	1	1	2	0.508476	0.508476
	12		k=Dv, extraction_date=2 vs extraction_date=6	0.4496	0.0001	7.3203	1510.66	1202.03	1898.53	7.7699	2368.23	2026.97	2766.96	1	1	1	1	2	0.567685	0.567685
	12		k=Dv, extraction_date=3 vs extraction_date=5	0.4257	0.0005	7.3057	1488.76	1184.6	1871.01	7.7314	2278.79	1950.41	2662.46	0	0	1	1	1	0.530662
	12		k=Dv, extraction_date=3 vs extraction_date=6	0.4641	<.0001	7.3057	1488.76	1184.6	1871.01	7.7699	2368.23	2026.97	2766.96	1	0	1	1	1	0.590741
	12		k=Dv, extraction_date=4 vs extraction_date=5	0.4707	<.0001	7.2607	1423.25	1132.48	1788.69	7.7314	2278.79	1950.41	2662.46	0	0	1	1	1	0.601115
	12		k=Dv, extraction_date=4 vs extraction_date=6	0.5091	<.0001	7.2607	1423.25	1132.48	1788.69	7.7699	2368.23	2026.97	2766.96	1	0	1	1	1	0.663959
	12		k=Ev, extraction_date=2 vs extraction_date=6	0.1566	<.0001	7.6037	2005.6	1736.22	2316.79	7.7603	2345.61	2032.07	2707.53	1	1	1	1	2	0.169528	0.169528
	12		k=Ev, extraction_date=3 vs extraction_date=6	0.138	0.0002	7.6224	2043.46	1769.51	2359.82	7.7603	2345.61	2032.07	2707.53	1	0	1	1	1	0.147861
	12		k=Ev, extraction_date=4 vs extraction_date=6	0.1703	<.0001	7.59	1978.31	1710.71	2287.77	7.7603	2345.61	2032.07	2707.53	1	0	1	1	1	0.18566
	12		k=Ev, extraction_date=5 vs extraction_date=6	0.1458	<.0001	7.6146	2027.58	1754.01	2343.83	7.7603	2345.61	2032.07	2707.53	1	0	1	1	1	0.156849
	12		k=No, extraction_date=4 vs extraction_date=6	0.09495	<.0001	7.4299	1685.64	1498.39	1896.29	7.5248	1853.44	1647.84	2084.7	1	0	1	1	1	0.0995489
	12		k=No, extraction_date=5 vs extraction_date=6	0.07626	0.0008	7.4486	1717.46	1526.79	1931.94	7.5248	1853.44	1647.84	2084.7	1	0	1	1	1	0.0791784
	25	Senior check	Comparison	Effect size	P-value	LSmean 1	BT 1	95% CI		LSmean 2	BT 2	CI low 2	CI high 2	lastExtr6	firstExtr2	1of2extract	2of2extract	Sec2First1	Percchange	PercchangePOS	PerccghangeNEG	An > Dv	An > Dy	An > Em	An > Ev	An > No	An > Vt	Dv > Dy	Dv > Em	Dv > Ev	Dv > No	Dv > Vt	Dy > Em	Dy > Ev	Dy > No	Dy > Vt	Em > Ev	Em > No	Em > Vt	Ev > No	Ev > Vt	No > Vt	An < Dv	An < Dy	An < Em	An < Ev	An < No	An < Vt	Dv < Dy
	25	Senior check	k=An, extraction_date=2 vs extraction_date=5	0.1227	0.0058	5.3092	202.188	162.115	252.167	5.4319	228.583	183.279	285.086	0	1	1	1	2	0.130545	0.130545
	25		k=An, extraction_date=2 vs extraction_date=6	0.1416	0.0004	5.3092	202.188	162.115	252.167	5.4508	232.944	186.776	290.526	1	1	1	1	2	0.152116	0.152116
	25		k=An, extraction_date=3 vs extraction_date=5	0.1601	<.0001	5.2718	194.766	156.256	242.767	5.4319	228.583	183.279	285.086	0	0	1	1	1	0.173628
	25		k=An, extraction_date=3 vs extraction_date=6	0.179	<.0001	5.2718	194.766	156.256	242.767	5.4508	232.944	186.776	290.526	1	0	1	1	1	0.196021
	25		k=Ev, extraction_date=3 vs extraction_date=6	0.119	0.0305	5.3514	210.903	166.342	267.403	5.4704	237.555	187.289	301.313	1	0	1	1	1	0.12637
	25		k=Ev, extraction_date=4 vs extraction_date=6	0.164	<.0001	5.3064	201.623	159.022	255.636	5.4704	237.555	187.289	301.313	1	0	1	1	1	0.178214
	25		k=Ev, extraction_date=5 vs extraction_date=6	0.1224	0.0208	5.348	210.188	165.777	266.495	5.4704	237.555	187.289	301.313	1	0	1	1	1	0.130206
	25		k=No, extraction_date=2 vs extraction_date=6	0.04416	0.0096	5.2758	195.547	175.991	217.276	5.3199	204.363	184.008	226.97	1	1	1	1	2	0.0450869	0.0450869
	25		k=No, extraction_date=3 vs extraction_date=4	-0.03842	0.034	5.2812	196.606	176.992	218.393	5.2427	189.18	170.307	210.144	0	0	1	1	1	-0.0377683
	25		k=No, extraction_date=3 vs extraction_date=6	0.03878	0.029	5.2812	196.606	176.992	218.393	5.3199	204.363	184.008	226.97	1	0	1	1	1	0.0394586
	25		k=No, extraction_date=4 vs extraction_date=5	0.04192	0.0096	5.2427	189.18	170.307	210.144	5.2847	197.295	177.616	219.154	0	0	1	1	1	0.0428945
	25		k=No, extraction_date=4 vs extraction_date=6	0.0772	<.0001	5.2427	189.18	170.307	210.144	5.3199	204.363	184.008	226.97	1	0	1	1	1	0.0802581
	19		Comparison	Effect size	P-value	LSmean 1	BT 1	95% CI		LSmean 2	BT 2	95% CI		lastExtr6	firstExtr2	1of2extract	2of2extract	Sec2First1	Percchange	PercchangePOS	PerccghangeNEG	An > Dv	An > Dy	An > Em	An > Ev	An > No	An > Vt	Dv > Dy	Dv > Em	Dv > Ev	Dv > No	Dv > Vt	Dy > Em	Dy > Ev	Dy > No	Dy > Vt	Em > Ev	Em > No	Em > Vt	Ev > No	Ev > Vt	No > Vt	An < Dv	An < Dy	An < Em	An < Ev	An < No	An < Vt	Dv < Dy
	19	Dental assess / scaling	k=An vs k=Dv, extraction_date=2	-0.3578	<.0001	5.6114	273.527	248.63	300.916	5.2536	191.254	173.669	210.619	0	0	1	0	1	-0.300787			-0.300787
	19		k=An vs k=No, extraction_date=2	-0.2984	<.0001	5.6114	273.527	248.63	300.916	5.313	202.958	190.019	216.778	0	0	1	0	1	-0.257996							-0.257996
	19		k=An vs k=Dv, extraction_date=3	-0.284	0.0004	5.573	263.223	239.287	289.552	5.289	198.145	179.884	218.26	0	0	1	0	1	-0.247233			-0.247233
	19		k=An vs k=No, extraction_date=3	-0.2676	<.0001	5.573	263.223	239.287	289.552	5.3055	201.442	188.703	215.041	0	0	1	0	1	-0.23471							-0.23471
	19		k=An vs k=Dv, extraction_date=4	-0.3435	<.0001	5.5868	266.88	242.475	293.742	5.2433	189.294	171.848	208.51	0	0	1	0	1	-0.290717			-0.290717
	19		k=An vs k=No, extraction_date=4	-0.3142	<.0001	5.5868	266.88	242.475	293.742	5.2726	194.922	182.599	208.077	0	0	1	0	1	-0.269627							-0.269627
	19		k=An vs k=Dv, extraction_date=5	-0.3803	<.0001	5.6483	283.809	257.89	312.332	5.268	194.028	176.063	213.825	0	0	1	0	1	-0.316344			-0.316344
	19		k=An vs k=No, extraction_date=5	-0.306	<.0001	5.6483	283.809	257.89	312.332	5.3424	209.014	195.819	223.098	0	0	1	0	1	-0.26354							-0.26354
	19		k=An vs k=Dv, extraction_date=6	-0.4086	<.0001	5.7151	303.415	275.765	333.836	5.3064	201.623	182.955	222.195	1	0	1	0	1	-0.335486			-0.335486
	19		k=An vs k=No, extraction_date=6	-0.3556	<.0001	5.7151	303.415	275.765	333.836	5.3595	212.619	199.2	226.941	1	0	1	0	1	-0.299247							-0.299247
	19		k=Dv vs k=Ev, extraction_date=2	0.3913	<.0001	5.2536	191.254	173.669	210.619	5.6449	282.845	259.852	307.874	0	0	1	0	1	0.478902
	19		k=Dv vs k=Vt, extraction_date=2	0.3525	0.0428	5.2536	191.254	173.669	210.619	5.6061	272.081	225.728	327.952	0	0	1	0	1	0.42262
	19		k=Dv vs k=Ev, extraction_date=3	0.3389	<.0001	5.289	198.145	179.884	218.26	5.6279	278.078	255.622	302.506	0	0	1	0	1	0.403403
	19		k=Dv vs k=Ev, extraction_date=4	0.345	<.0001	5.2433	189.294	171.848	208.51	5.5883	267.281	245.62	290.852	0	0	1	0	1	0.41199
	19		k=Dv vs k=Em, extraction_date=5	0.4119	0.0042	5.268	194.028	176.063	213.825	5.6799	292.92	246.737	347.748	0	0	1	0	1	0.509683
	19		k=Dv vs k=Ev, extraction_date=5	0.4698	<.0001	5.268	194.028	176.063	213.825	5.7378	310.381	285.277	337.694	0	0	1	0	1	0.599674
	19		k=Dv vs k=Vt, extraction_date=5	0.3596	0.0336	5.268	194.028	176.063	213.825	5.6276	277.994	230.58	335.159	0	0	1	0	1	0.432756
	19		k=Dv vs k=Ev, extraction_date=6	0.5049	<.0001	5.3064	201.623	182.955	222.195	5.8114	334.087	307.078	363.471	1	0	1	0	1	0.656986
	19		k=Dv vs k=Vt, extraction_date=6	0.4207	0.0022	5.3064	201.623	182.955	222.195	5.7271	307.077	254.703	370.222	1	0	1	0	1	0.523027
	19		k=Em vs k=No, extraction_date=5	-0.3375	0.0196	5.6799	292.92	246.737	347.748	5.3424	209.014	195.819	223.098	0	0	1	0	1	-0.286448																			-0.286448
	19		k=Ev vs k=No, extraction_date=2	-0.3318	<.0001	5.6449	282.845	259.852	307.874	5.313	202.958	190.019	216.778	0	0	1	0	1	-0.282441																					-0.282441
	19		k=Ev vs k=No, extraction_date=3	-0.3224	<.0001	5.6279	278.078	255.622	302.506	5.3055	201.442	188.703	215.041	0	0	1	0	1	-0.275592																					-0.275592
	19		k=Ev vs k=No, extraction_date=4	-0.3157	<.0001	5.5883	267.281	245.62	290.852	5.2726	194.922	182.599	208.077	0	0	1	0	1	-0.270722																					-0.270722
	19		k=Ev vs k=No, extraction_date=5	-0.3954	<.0001	5.7378	310.381	285.277	337.694	5.3424	209.014	195.819	223.098	0	0	1	0	1	-0.326589																					-0.326589
	19		k=Ev vs k=No, extraction_date=6	-0.4519	<.0001	5.8114	334.087	307.078	363.471	5.3595	212.619	199.2	226.941	1	0	1	0	1	-0.363582																					-0.363582
	19		k=No vs k=Vt, extraction_date=6	0.3676	0.0135	5.3595	212.619	199.2	226.941	5.7271	307.077	254.703	370.222	1	0	1	0	1	0.444264
	19		k=An, extraction_date=2 vs extraction_date=6	0.1037	0.0003	5.6114	273.527	248.63	300.916	5.7151	303.415	275.765	333.836	1	1	1	1	2	0.109268	0.109268
	19		k=An, extraction_date=3 vs extraction_date=6	0.142	<.0001	5.573	263.223	239.287	289.552	5.7151	303.415	275.765	333.836	1	0	1	1	1	0.152692
	19		k=An, extraction_date=4 vs extraction_date=6	0.1283	<.0001	5.5868	266.88	242.475	293.742	5.7151	303.415	275.765	333.836	1	0	1	1	1	0.136894
	19		k=Em, extraction_date=4 vs extraction_date=5	0.1825	0.0007	5.4974	244.057	205.577	289.738	5.6799	292.92	246.737	347.748	0	0	1	1	1	0.200214
	19		k=Em, extraction_date=4 vs extraction_date=6	0.1473	0.0363	5.4974	244.057	205.577	289.738	5.6447	282.789	238.203	335.72	1	0	1	1	1	0.158702
	19		k=Ev, extraction_date=2 vs extraction_date=5	0.09293	0.0007	5.6449	282.845	259.852	307.874	5.7378	310.381	285.277	337.694	0	1	1	1	2	0.097352	0.097352
	19		k=Ev, extraction_date=2 vs extraction_date=6	0.1665	<.0001	5.6449	282.845	259.852	307.874	5.8114	334.087	307.078	363.471	1	1	1	1	2	0.181164	0.181164
	19		k=Ev, extraction_date=3 vs extraction_date=5	0.1098	<.0001	5.6279	278.078	255.622	302.506	5.7378	310.381	285.277	337.694	0	0	1	1	1	0.116166
	19		k=Ev, extraction_date=3 vs extraction_date=6	0.1834	<.0001	5.6279	278.078	255.622	302.506	5.8114	334.087	307.078	363.471	1	0	1	1	1	0.201415
	19		k=Ev, extraction_date=4 vs extraction_date=5	0.1495	<.0001	5.5883	267.281	245.62	290.852	5.7378	310.381	285.277	337.694	0	0	1	1	1	0.161253
	19		k=Ev, extraction_date=4 vs extraction_date=6	0.2231	<.0001	5.5883	267.281	245.62	290.852	5.8114	334.087	307.078	363.471	1	0	1	1	1	0.249946
	19		k=Ev, extraction_date=5 vs extraction_date=6	0.07358	0.0264	5.7378	310.381	285.277	337.694	5.8114	334.087	307.078	363.471	1	0	1	1	1	0.0763762
	19		k=No, extraction_date=2 vs extraction_date=4	-0.04045	0.0125	5.313	202.958	190.019	216.778	5.2726	194.922	182.599	208.077	0	1	1	1	2	-0.0395948		-0.0395948
	19		k=No, extraction_date=2 vs extraction_date=6	0.04643	0.0008	5.313	202.958	190.019	216.778	5.3595	212.619	199.2	226.941	1	1	1	1	2	0.0475981	0.0475981
	19		k=No, extraction_date=3 vs extraction_date=5	0.03686	0.0105	5.3055	201.442	188.703	215.041	5.3424	209.014	195.819	223.098	0	0	1	1	1	0.0375893
	19		k=No, extraction_date=3 vs extraction_date=6	0.05397	<.0001	5.3055	201.442	188.703	215.041	5.3595	212.619	199.2	226.941	1	0	1	1	1	0.0554846
	19		k=No, extraction_date=4 vs extraction_date=5	0.06977	<.0001	5.2726	194.922	182.599	208.077	5.3424	209.014	195.819	223.098	0	0	1	1	1	0.0722937
	19		k=No, extraction_date=4 vs extraction_date=6	0.08688	<.0001	5.2726	194.922	182.599	208.077	5.3595	212.619	199.2	226.941	1	0	1	1	1	0.0907876
	4		Comparison	Effect size	P-value	LSmean 1	BT 1	95% CI		LSmean 2	BT 2	95% CI		lastExtr6	firstExtr2	1of2extract	2of2extract	Sec2First1	Percchange	PercchangePOS	PerccghangeNEG	An > Dv	An > Dy	An > Em	An > Ev	An > No	An > Vt	Dv > Dy	Dv > Em	Dv > Ev	Dv > No	Dv > Vt	Dy > Em	Dy > Ev	Dy > No	Dy > Vt	Em > Ev	Em > No	Em > Vt	Ev > No	Ev > Vt	No > Vt	An < Dv	An < Dy	An < Em	An < Ev	An < No	An < Vt	Dv < Dy
	4	Dental assess / scaling	k=An vs k=No, extraction_date=2	-0.3054	<.0001	5.8768	356.666	326.05	390.157	5.5714	262.802	244.826	282.098	0	0	1	0	1	-0.263171							-0.263171
	4		k=An vs k=No, extraction_date=3	-0.2677	<.0001	5.8383	343.195	313.748	375.406	5.5706	262.592	244.673	281.823	0	0	1	0	1	-0.234863							-0.234863
	4		k=An vs k=No, extraction_date=4	-0.3041	<.0001	5.8419	344.433	314.812	376.842	5.5378	254.118	236.778	272.729	0	0	1	0	1	-0.262213							-0.262213
	4		k=An vs k=No, extraction_date=5	-0.3076	<.0001	5.9009	365.366	333.971	399.713	5.5933	268.621	250.295	288.287	0	0	1	0	1	-0.264791							-0.264791
	4		k=An vs k=No, extraction_date=6	-0.3271	<.0001	5.9459	382.183	349.336	418.119	5.6187	275.531	256.734	295.704	1	0	1	0	1	-0.27906							-0.27906
	4		k=Ev vs k=No, extraction_date=2	-0.2939	<.0001	5.8654	352.623	325.58	381.913	5.5714	262.802	244.826	282.098	0	0	1	0	1	-0.254724																					-0.254724
	4		k=Ev vs k=No, extraction_date=3	-0.268	<.0001	5.8386	343.298	317.076	371.689	5.5706	262.592	244.673	281.823	0	0	1	0	1	-0.235092																					-0.235092
	4		k=Ev vs k=No, extraction_date=4	-0.261	<.0001	5.7988	329.903	304.668	357.229	5.5378	254.118	236.778	272.729	0	0	1	0	1	-0.229719																					-0.229719
	4		k=Ev vs k=No, extraction_date=5	-0.3409	<.0001	5.9342	377.738	348.851	409.017	5.5933	268.621	250.295	288.287	0	0	1	0	1	-0.28887																					-0.28887
	4		k=Ev vs k=No, extraction_date=6	-0.3766	<.0001	5.9953	401.537	370.852	434.761	5.6187	275.531	256.734	295.704	1	0	1	0	1	-0.31381																					-0.31381
	4		k=An, extraction_date=2 vs extraction_date=6	0.06902	0.0004	5.8768	356.666	326.05	390.157	5.9459	382.183	349.336	418.119	1	1	1	1	2	0.0715434	0.0715434
	4		k=An, extraction_date=3 vs extraction_date=5	0.0626	0.0019	5.8383	343.195	313.748	375.406	5.9009	365.366	333.971	399.713	0	0	1	1	1	0.0646009
	4		k=An, extraction_date=3 vs extraction_date=6	0.1075	<.0001	5.8383	343.195	313.748	375.406	5.9459	382.183	349.336	418.119	1	0	1	1	1	0.113602
	4		k=An, extraction_date=4 vs extraction_date=5	0.05902	0.0067	5.8419	344.433	314.812	376.842	5.9009	365.366	333.971	399.713	0	0	1	1	1	0.0607752
	4		k=An, extraction_date=4 vs extraction_date=6	0.1039	<.0001	5.8419	344.433	314.812	376.842	5.9459	382.183	349.336	418.119	1	0	1	1	1	0.1096
	4		k=Dv, extraction_date=2 vs extraction_date=6	0.05189	0.0056	5.7628	318.238	278.343	363.852	5.8147	335.191	293.107	383.317	1	1	1	1	2	0.0532704	0.0532704
	4		k=Dv, extraction_date=3 vs extraction_date=4	-0.04571	0.025	5.7971	329.343	288.033	376.578	5.7513	314.599	275.139	359.72	0	0	1	1	1	-0.044767
	4		k=Dv, extraction_date=4 vs extraction_date=6	0.06332	<.0001	5.7513	314.599	275.139	359.72	5.8147	335.191	293.107	383.317	1	0	1	1	1	0.0654529
	4		k=Dy, extraction_date=2 vs extraction_date=6	0.2448	<.0001	5.6	270.426	224.747	325.39	5.8448	345.433	286.242	416.866	1	1	1	1	2	0.277366	0.277366
	4		k=Dy, extraction_date=3 vs extraction_date=6	0.3044	<.0001	5.5404	254.78	211.404	307.056	5.8448	345.433	286.242	416.866	1	0	1	1	1	0.355811
	4		k=Dy, extraction_date=4 vs extraction_date=5	0.1687	0.0005	5.4978	244.154	202.587	294.25	5.6665	289.021	239.815	348.323	0	0	1	1	1	0.183765
	4		k=Dy, extraction_date=4 vs extraction_date=6	0.347	<.0001	5.4978	244.154	202.587	294.25	5.8448	345.433	286.242	416.866	1	0	1	1	1	0.414817
	4		k=Dy, extraction_date=5 vs extraction_date=6	0.1783	0.0004	5.6665	289.021	239.815	348.323	5.8448	345.433	286.242	416.866	1	0	1	1	1	0.195184
	4		k=Em, extraction_date=2 vs extraction_date=4	-0.1072	0.0174	5.7072	301.027	255.907	354.102	5.6001	270.453	229.916	318.138	0	1	1	1	2	-0.101564		-0.101564
	4		k=Em, extraction_date=3 vs extraction_date=5	0.1361	0.0001	5.6422	282.083	239.802	331.818	5.7783	323.209	274.764	380.196	0	0	1	1	1	0.145796
	4		k=Em, extraction_date=3 vs extraction_date=6	0.1015	0.0397	5.6422	282.083	239.802	331.818	5.7437	312.217	265.42	367.266	1	0	1	1	1	0.10683
	4		k=Em, extraction_date=4 vs extraction_date=5	0.1783	<.0001	5.6001	270.453	229.916	318.138	5.7783	323.209	274.764	380.196	0	0	1	1	1	0.195064
	4		k=Em, extraction_date=4 vs extraction_date=6	0.1437	<.0001	5.6001	270.453	229.916	318.138	5.7437	312.217	265.42	367.266	1	0	1	1	1	0.154422
	4		k=Ev, extraction_date=2 vs extraction_date=4	-0.06654	<.0001	5.8654	352.623	325.58	381.913	5.7988	329.903	304.668	357.229	0	1	1	1	2	-0.0644306		-0.0644306
	4		k=Ev, extraction_date=2 vs extraction_date=5	0.06885	<.0001	5.8654	352.623	325.58	381.913	5.9342	377.738	348.851	409.017	0	1	1	1	2	0.0712219	0.0712219
	4		k=Ev, extraction_date=2 vs extraction_date=6	0.13	<.0001	5.8654	352.623	325.58	381.913	5.9953	401.537	370.852	434.761	1	1	1	1	2	0.138715	0.138715
	4		k=Ev, extraction_date=3 vs extraction_date=5	0.09563	<.0001	5.8386	343.298	317.076	371.689	5.9342	377.738	348.851	409.017	0	0	1	1	1	0.100319
	4		k=Ev, extraction_date=3 vs extraction_date=6	0.1567	<.0001	5.8386	343.298	317.076	371.689	5.9953	401.537	370.852	434.761	1	0	1	1	1	0.169645
	4		k=Ev, extraction_date=4 vs extraction_date=5	0.1354	<.0001	5.7988	329.903	304.668	357.229	5.9342	377.738	348.851	409.017	0	0	1	1	1	0.144995
	4		k=Ev, extraction_date=4 vs extraction_date=6	0.1965	<.0001	5.7988	329.903	304.668	357.229	5.9953	401.537	370.852	434.761	1	0	1	1	1	0.217135
	4		k=Ev, extraction_date=5 vs extraction_date=6	0.06111	0.0004	5.9342	377.738	348.851	409.017	5.9953	401.537	370.852	434.761	1	0	1	1	1	0.0630052
	4		k=No, extraction_date=2 vs extraction_date=4	-0.03361	<.0001	5.5714	262.802	244.826	282.098	5.5378	254.118	236.778	272.729	0	1	1	1	2	-0.0330418		-0.0330418
	4		k=No, extraction_date=2 vs extraction_date=6	0.04729	<.0001	5.5714	262.802	244.826	282.098	5.6187	275.531	256.734	295.704	1	1	1	1	2	0.0484365	0.0484365
	4		k=No, extraction_date=3 vs extraction_date=4	-0.03276	<.0001	5.5706	262.592	244.673	281.823	5.5378	254.118	236.778	272.729	0	0	1	1	1	-0.0322679
	4		k=No, extraction_date=3 vs extraction_date=5	0.02276	0.0345	5.5706	262.592	244.673	281.823	5.5933	268.621	250.295	288.287	0	0	1	1	1	0.0229596
	4		k=No, extraction_date=3 vs extraction_date=6	0.04814	<.0001	5.5706	262.592	244.673	281.823	5.6187	275.531	256.734	295.704	1	0	1	1	1	0.0492756
	4		k=No, extraction_date=4 vs extraction_date=5	0.05551	<.0001	5.5378	254.118	236.778	272.729	5.5933	268.621	250.295	288.287	0	0	1	1	1	0.057069
	4		k=No, extraction_date=4 vs extraction_date=6	0.0809	<.0001	5.5378	254.118	236.778	272.729	5.6187	275.531	256.734	295.704	1	0	1	1	1	0.0842625
	4		k=No, extraction_date=5 vs extraction_date=6	0.02538	0.0045	5.5933	268.621	250.295	288.287	5.6187	275.531	256.734	295.704	1	0	1	1	1	0.0257253
	4		k=Vt, extraction_date=2 vs extraction_date=6	0.1526	0.0002	5.709	301.569	254.027	358.009	5.8617	351.321	295.692	417.415	1	1	1	1	2	0.164975	0.164975
	4		k=Vt, extraction_date=3 vs extraction_date=6	0.1187	0.0273	5.743	311.999	262.813	370.391	5.8617	351.321	295.692	417.415	1	0	1	1	1	0.126032
	4		k=Vt, extraction_date=4 vs extraction_date=6	0.1623	<.0001	5.6994	298.688	251.393	354.881	5.8617	351.321	295.692	417.415	1	0	1	1	1	0.176213
	14		Comparison	Effect size	P-value	LSmean 1	BT 1	95% CI		LSmean 2	BT 2	95% CI		lastExtr6	firstExtr2	1of2extract	2of2extract	Sec2First1	Percchange	PercchangePOS	PerccghangeNEG	An > Dv	An > Dy	An > Em	An > Ev	An > No	An > Vt	Dv > Dy	Dv > Em	Dv > Ev	Dv > No	Dv > Vt	Dy > Em	Dy > Ev	Dy > No	Dy > Vt	Em > Ev	Em > No	Em > Vt	Ev > No	Ev > Vt	No > Vt	An < Dv	An < Dy	An < Em	An < Ev	An < No	An < Vt	Dv < Dy
	14	TPLO	k=No, extraction_date=2 vs extraction_date=6	0.1785	<.0001	8.1986	3635.86	3241.16	4078.62	8.3771	4346.39	3895.87	4849	1	1	1	1	2	0.195423	0.195423
	14		k=No, extraction_date=3 vs extraction_date=6	0.1776	<.0001	8.1995	3639.13	3253.88	4069.99	8.3771	4346.39	3895.87	4849	1	0	1	1	1	0.194347
	14		k=No, extraction_date=4 vs extraction_date=5	0.1189	0.0147	8.1523	3471.35	3108.19	3876.95	8.2712	3909.64	3500	4367.22	0	0	1	1	1	0.126257
	14		k=No, extraction_date=4 vs extraction_date=6	0.2248	<.0001	8.1523	3471.35	3108.19	3876.95	8.3771	4346.39	3895.87	4849	1	0	1	1	1	0.252072
	14		k=No, extraction_date=5 vs extraction_date=6	0.1059	0.0382	8.2712	3909.64	3500	4367.22	8.3771	4346.39	3895.87	4849	1	0	1	1	1	0.111711
	15		Comparison	Effect size	P-value	LSmean 1	BT 1	95% CI		LSmean 2	BT 2	95% CI		lastExtr6	firstExtr2	1of2extract	2of2extract	Sec2First1	Percchange	PercchangePOS	PerccghangeNEG	An > Dv	An > Dy	An > Em	An > Ev	An > No	An > Vt	Dv > Dy	Dv > Em	Dv > Ev	Dv > No	Dv > Vt	Dy > Em	Dy > Ev	Dy > No	Dy > Vt	Em > Ev	Em > No	Em > Vt	Ev > No	Ev > Vt	No > Vt	An < Dv	An < Dy	An < Em	An < Ev	An < No	An < Vt	Dv < Dy
	15	Vacc - distemper…	k=An vs k=Dv, extraction_date=2	-0.3121	<.0001	4.0965	60.1295	56.5183	63.9714	3.7844	44.0093	41.7973	46.3382	0	0	1	0	1	-0.268092			-0.268092
	15		k=An vs k=No, extraction_date=2	-0.335	<.0001	4.0965	60.1295	56.5183	63.9714	3.7615	43.0129	41.9464	44.1065	0	0	1	0	1	-0.284662							-0.284662
	15		k=An vs k=Vt, extraction_date=2	-0.3714	<.0001	4.0965	60.1295	56.5183	63.9714	3.7251	41.4754	36.5543	47.059	0	0	1	0	1	-0.310232								-0.310232
	15		k=An vs k=Dv, extraction_date=3	-0.2696	<.0001	4.0796	59.1218	55.5701	62.9006	3.81	45.1504	42.8795	47.5417	0	0	1	0	1	-0.236315			-0.236315
	15		k=An vs k=No, extraction_date=3	-0.3169	<.0001	4.0796	59.1218	55.5701	62.9006	3.7627	43.0645	41.9968	44.1595	0	0	1	0	1	-0.271596							-0.271596
	15		k=An vs k=Vt, extraction_date=3	-0.3465	0.0002	4.0796	59.1218	55.5701	62.9006	3.7331	41.8085	36.8479	47.437	0	0	1	0	1	-0.292841								-0.292841
	15		k=An vs k=Dv, extraction_date=4	-0.2851	<.0001	4.0493	57.3573	53.9136	61.0209	3.7642	43.1292	40.9599	45.4134	0	0	1	0	1	-0.248061			-0.248061
	15		k=An vs k=No, extraction_date=4	-0.3278	<.0001	4.0493	57.3573	53.9136	61.0209	3.7215	41.3263	40.3024	42.3762	0	0	1	0	1	-0.279493							-0.279493
	15		k=An vs k=Vt, extraction_date=4	-0.3575	<.0001	4.0493	57.3573	53.9136	61.0209	3.6918	40.117	35.357	45.5178	0	0	1	0	1	-0.300577								-0.300577
	15		k=An vs k=Dv, extraction_date=5	-0.2976	<.0001	4.0869	59.555	55.9794	63.359	3.7892	44.221	41.9943	46.5658	0	0	1	0	1	-0.257476			-0.257476
	15		k=An vs k=Dy, extraction_date=5	0.4001	0.0006	4.0869	59.555	55.9794	63.359	4.4869	88.8456	75.8359	104.087	0	0	1	0	1	0.491825																									0.491825
	15		k=An vs k=No, extraction_date=5	-0.3329	<.0001	4.0869	59.555	55.9794	63.359	3.754	42.6915	41.6346	43.7752	0	0	1	0	1	-0.283158							-0.283158
	15		k=An vs k=Vt, extraction_date=5	-0.3717	<.0001	4.0869	59.555	55.9794	63.359	3.7151	41.0627	36.1905	46.5908	0	0	1	0	1	-0.310508								-0.310508
	15		k=An vs k=Dv, extraction_date=6	-0.3279	<.0001	4.1556	63.7902	59.9662	67.8581	3.8277	45.9567	43.6426	48.3935	1	0	1	0	1	-0.279565			-0.279565
	15		k=An vs k=Dy, extraction_date=6	0.4186	0.0002	4.1556	63.7902	59.9662	67.8581	4.5742	96.9504	82.7117	113.64	1	0	1	0	1	0.519832																									0.519832
	15		k=An vs k=No, extraction_date=6	-0.3557	<.0001	4.1556	63.7902	59.9662	67.8581	3.7999	44.6967	43.591	45.8305	1	0	1	0	1	-0.299317							-0.299317
	15		k=An vs k=Vt, extraction_date=6	-0.3748	<.0001	4.1556	63.7902	59.9662	67.8581	3.7807	43.8467	38.6442	49.7496	1	0	1	0	1	-0.312642								-0.312642
	15		k=Dv vs k=Ev, extraction_date=2	0.1997	<.0001	3.7844	44.0093	41.7973	46.3382	3.984	53.7315	51.4245	56.142	0	0	1	0	1	0.220914
	15		k=Dv vs k=Ev, extraction_date=3	0.1634	0.0003	3.81	45.1504	42.8795	47.5417	3.9735	53.1703	50.8864	55.5567	0	0	1	0	1	0.177625
	15		k=Dv vs k=Ev, extraction_date=4	0.164	0.0003	3.7642	43.1292	40.9599	45.4134	3.9282	50.8154	48.6327	53.0961	0	0	1	0	1	0.178214
	15		k=Dv vs k=Dy, extraction_date=5	0.6977	<.0001	3.7892	44.221	41.9943	46.5658	4.4869	88.8456	75.8359	104.087	0	0	1	0	1	1.00913																														1.00913
	15		k=Dv vs k=Ev, extraction_date=5	0.2039	<.0001	3.7892	44.221	41.9943	46.5658	3.9932	54.2281	51.909	56.6509	0	0	1	0	1	0.226298
	15		k=Dv vs k=Dy, extraction_date=6	0.7465	<.0001	3.8277	45.9567	43.6426	48.3935	4.5742	96.9504	82.7117	113.64	1	0	1	0	1	1.1096																														1.1096
	15		k=Dv vs k=Ev, extraction_date=6	0.2329	<.0001	3.8277	45.9567	43.6426	48.3935	4.0606	58.0091	55.5283	60.6008	1	0	1	0	1	0.262255
	15		k=Dy vs k=Ev, extraction_date=5	-0.4938	<.0001	4.4869	88.8456	75.8359	104.087	3.9932	54.2281	51.909	56.6509	0	0	1	0	1	-0.389636															-0.389636
	15		k=Dy vs k=No, extraction_date=5	-0.7329	<.0001	4.4869	88.8456	75.8359	104.087	3.754	42.6915	41.6346	43.7752	0	0	1	0	1	-0.519487																-0.519487
	15		k=Dy vs k=Vt, extraction_date=5	-0.7718	<.0001	4.4869	88.8456	75.8359	104.087	3.7151	41.0627	36.1905	46.5908	0	0	1	0	1	-0.53782																	-0.53782
	15		k=Dy vs k=Ev, extraction_date=6	-0.5136	<.0001	4.5742	96.9504	82.7117	113.64	4.0606	58.0091	55.5283	60.6008	1	0	1	0	1	-0.401662															-0.401662
	15		k=Dy vs k=No, extraction_date=6	-0.7743	<.0001	4.5742	96.9504	82.7117	113.64	3.7999	44.6967	43.591	45.8305	1	0	1	0	1	-0.538974																-0.538974
	15		k=Dy vs k=Vt, extraction_date=6	-0.7934	<.0001	4.5742	96.9504	82.7117	113.64	3.7807	43.8467	38.6442	49.7496	1	0	1	0	1	-0.547741																	-0.547741
	15		k=Ev vs k=No, extraction_date=2	-0.2225	<.0001	3.984	53.7315	51.4245	56.142	3.7615	43.0129	41.9464	44.1065	0	0	1	0	1	-0.199485																					-0.199485
	15		k=Ev vs k=Vt, extraction_date=2	-0.2589	0.0209	3.984	53.7315	51.4245	56.142	3.7251	41.4754	36.5543	47.059	0	0	1	0	1	-0.2281																						-0.2281
	15		k=Ev vs k=No, extraction_date=3	-0.2108	<.0001	3.9735	53.1703	50.8864	55.5567	3.7627	43.0645	41.9968	44.1595	0	0	1	0	1	-0.190064																					-0.190064
	15		k=Ev vs k=No, extraction_date=4	-0.2067	<.0001	3.9282	50.8154	48.6327	53.0961	3.7215	41.3263	40.3024	42.3762	0	0	1	0	1	-0.186736																					-0.186736
	15		k=Ev vs k=No, extraction_date=5	-0.2392	<.0001	3.9932	54.2281	51.909	56.6509	3.754	42.6915	41.6346	43.7752	0	0	1	0	1	-0.212743																					-0.212743
	15		k=Ev vs k=Vt, extraction_date=5	-0.278	0.0066	3.9932	54.2281	51.909	56.6509	3.7151	41.0627	36.1905	46.5908	0	0	1	0	1	-0.242779																						-0.242779
	15		k=Ev vs k=No, extraction_date=6	-0.2607	<.0001	4.0606	58.0091	55.5283	60.6008	3.7999	44.6967	43.591	45.8305	1	0	1	0	1	-0.229488																					-0.229488
	15		k=Ev vs k=Vt, extraction_date=6	-0.2798	0.0059	4.0606	58.0091	55.5283	60.6008	3.7807	43.8467	38.6442	49.7496	1	0	1	0	1	-0.244141																						-0.244141
	15		k=An, extraction_date=2 vs extraction_date=4	-0.04722	<.0001	4.0965	60.1295	56.5183	63.9714	4.0493	57.3573	53.9136	61.0209	0	1	1	1	2	-0.0461034		-0.0461034
	15		k=An, extraction_date=2 vs extraction_date=6	0.05906	<.0001	4.0965	60.1295	56.5183	63.9714	4.1556	63.7902	59.9662	67.8581	1	1	1	1	2	0.0608813	0.0608813
	15		k=An, extraction_date=3 vs extraction_date=4	-0.03028	0.0018	4.0796	59.1218	55.5701	62.9006	4.0493	57.3573	53.9136	61.0209	0	0	1	1	1	-0.0298456
	15		k=An, extraction_date=3 vs extraction_date=6	0.076	<.0001	4.0796	59.1218	55.5701	62.9006	4.1556	63.7902	59.9662	67.8581	1	0	1	1	1	0.0789626
	15		k=An, extraction_date=4 vs extraction_date=5	0.03756	<.0001	4.0493	57.3573	53.9136	61.0209	4.0869	59.555	55.9794	63.359	0	0	1	1	1	0.0383158
	15		k=An, extraction_date=4 vs extraction_date=6	0.1063	<.0001	4.0493	57.3573	53.9136	61.0209	4.1556	63.7902	59.9662	67.8581	1	0	1	1	1	0.112155
	15		k=An, extraction_date=5 vs extraction_date=6	0.06872	<.0001	4.0869	59.555	55.9794	63.359	4.1556	63.7902	59.9662	67.8581	1	0	1	1	1	0.0711148
	15		k=Dv, extraction_date=2 vs extraction_date=3	0.02563	0.0003	3.7844	44.0093	41.7973	46.3382	3.81	45.1504	42.8795	47.5417	0	1	1	1	2	0.0259305	0.0259305
	15		k=Dv, extraction_date=2 vs extraction_date=4	-0.02021	0.0231	3.7844	44.0093	41.7973	46.3382	3.7642	43.1292	40.9599	45.4134	0	1	1	1	2	-0.0199973		-0.0199973
	15		k=Dv, extraction_date=2 vs extraction_date=6	0.04331	<.0001	3.7844	44.0093	41.7973	46.3382	3.8277	45.9567	43.6426	48.3935	1	1	1	1	2	0.0442511	0.0442511
	15		k=Dv, extraction_date=3 vs extraction_date=4	-0.04584	<.0001	3.81	45.1504	42.8795	47.5417	3.7642	43.1292	40.9599	45.4134	0	0	1	1	1	-0.044767
	15		k=Dv, extraction_date=3 vs extraction_date=5	-0.02078	0.0197	3.81	45.1504	42.8795	47.5417	3.7892	44.221	41.9943	46.5658	0	0	1	1	1	-0.0205852
	15		k=Dv, extraction_date=4 vs extraction_date=5	0.02505	0.0006	3.7642	43.1292	40.9599	45.4134	3.7892	44.221	41.9943	46.5658	0	0	1	1	1	0.0253151
	15		k=Dv, extraction_date=4 vs extraction_date=6	0.06352	<.0001	3.7642	43.1292	40.9599	45.4134	3.8277	45.9567	43.6426	48.3935	1	0	1	1	1	0.0655595
	15		k=Dv, extraction_date=5 vs extraction_date=6	0.03847	<.0001	3.7892	44.221	41.9943	46.5658	3.8277	45.9567	43.6426	48.3935	1	0	1	1	1	0.0392507
	15		k=Dy, extraction_date=5 vs extraction_date=6	0.08722	<.0001	4.4869	88.8456	75.8359	104.087	4.5742	96.9504	82.7117	113.64	1	0	1	1	1	0.091224
	15		k=Ev, extraction_date=2 vs extraction_date=4	-0.05582	<.0001	3.984	53.7315	51.4245	56.142	3.9282	50.8154	48.6327	53.0961	0	1	1	1	2	-0.0542717		-0.0542717
	15		k=Ev, extraction_date=2 vs extraction_date=6	0.07653	<.0001	3.984	53.7315	51.4245	56.142	4.0606	58.0091	55.5283	60.6008	1	1	1	1	2	0.0796101	0.0796101
	15		k=Ev, extraction_date=3 vs extraction_date=4	-0.04524	<.0001	3.9735	53.1703	50.8864	55.5567	3.9282	50.8154	48.6327	53.0961	0	0	1	1	1	-0.0442893
	15		k=Ev, extraction_date=3 vs extraction_date=5	0.01971	0.0108	3.9735	53.1703	50.8864	55.5567	3.9932	54.2281	51.909	56.6509	0	0	1	1	1	0.0198953
	15		k=Ev, extraction_date=3 vs extraction_date=6	0.0871	<.0001	3.9735	53.1703	50.8864	55.5567	4.0606	58.0091	55.5283	60.6008	1	0	1	1	1	0.0910058
	15		k=Ev, extraction_date=4 vs extraction_date=5	0.06495	<.0001	3.9282	50.8154	48.6327	53.0961	3.9932	54.2281	51.909	56.6509	0	0	1	1	1	0.067159
	15		k=Ev, extraction_date=4 vs extraction_date=6	0.1323	<.0001	3.9282	50.8154	48.6327	53.0961	4.0606	58.0091	55.5283	60.6008	1	0	1	1	1	0.141565
	15		k=Ev, extraction_date=5 vs extraction_date=6	0.0674	<.0001	3.9932	54.2281	51.909	56.6509	4.0606	58.0091	55.5283	60.6008	1	0	1	1	1	0.0697233
	15		k=No, extraction_date=2 vs extraction_date=4	-0.04	<.0001	3.7615	43.0129	41.9464	44.1065	3.7215	41.3263	40.3024	42.3762	0	1	1	1	2	-0.0392106		-0.0392106
	15		k=No, extraction_date=2 vs extraction_date=6	0.03834	<.0001	3.7615	43.0129	41.9464	44.1065	3.7999	44.6967	43.591	45.8305	1	1	1	1	2	0.0391468	0.0391468
	15		k=No, extraction_date=3 vs extraction_date=4	-0.04116	<.0001	3.7627	43.0645	41.9968	44.1595	3.7215	41.3263	40.3024	42.3762	0	0	1	1	1	-0.0403628
	15		k=No, extraction_date=3 vs extraction_date=6	0.03718	<.0001	3.7627	43.0645	41.9968	44.1595	3.7999	44.6967	43.591	45.8305	1	0	1	1	1	0.0379006
	15		k=No, extraction_date=4 vs extraction_date=5	0.03246	<.0001	3.7215	41.3263	40.3024	42.3762	3.754	42.6915	41.6346	43.7752	0	0	1	1	1	0.0330339
	15		k=No, extraction_date=4 vs extraction_date=6	0.07834	<.0001	3.7215	41.3263	40.3024	42.3762	3.7999	44.6967	43.591	45.8305	1	0	1	1	1	0.0815552
	15		k=No, extraction_date=5 vs extraction_date=6	0.04588	<.0001	3.754	42.6915	41.6346	43.7752	3.7999	44.6967	43.591	45.8305	1	0	1	1	1	0.0469697
	15		k=Vt, extraction_date=2 vs extraction_date=6	0.05562	0.0019	3.7251	41.4754	36.5543	47.059	3.7807	43.8467	38.6442	49.7496	1	1	1	1	2	0.0571747	0.0571747
	15		k=Vt, extraction_date=3 vs extraction_date=6	0.04767	0.0265	3.7331	41.8085	36.8479	47.437	3.7807	43.8467	38.6442	49.7496	1	0	1	1	1	0.0487511
	15		k=Vt, extraction_date=4 vs extraction_date=6	0.08894	<.0001	3.6918	40.117	35.357	45.5178	3.7807	43.8467	38.6442	49.7496	1	0	1	1	1	0.0929714
	15		k=Vt, extraction_date=5 vs extraction_date=6	0.0656	<.0001	3.7151	41.0627	36.1905	46.5908	3.7807	43.8467	38.6442	49.7496	1	0	1	1	1	0.0677995
	27		Comparison	Effect size	P-value	LSmean 1	BT 1	95% CI		LSmean 2	BT 2	95% CI		lastExtr6	firstExtr2	1of2extract	2of2extract	Sec2First1	Percchange	PercchangePOS	PerccghangeNEG	An > Dv	An > Dy	An > Em	An > Ev	An > No	An > Vt	Dv > Dy	Dv > Em	Dv > Ev	Dv > No	Dv > Vt	Dy > Em	Dy > Ev	Dy > No	Dy > Vt	Em > Ev	Em > No	Em > Vt	Ev > No	Ev > Vt	No > Vt	An < Dv	An < Dy	An < Em	An < Ev	An < No	An < Vt	Dv < Dy
	27	Vacc - calicivirus…	k=An vs k=No, extraction_date=2	-0.2803	<.0001	3.9746	53.2288	49.4316	57.3177	3.6943	40.2174	38.9475	41.5287	0	0	1	0	1	-0.244443							-0.244443
	27		k=An vs k=Vt, extraction_date=2	-0.3152	0.0166	3.9746	53.2288	49.4316	57.3177	3.6595	38.8419	33.5721	44.9389	0	0	1	0	1	-0.270284								-0.270284
	27		k=An vs k=No, extraction_date=3	-0.2596	<.0001	3.9579	52.3473	48.613	56.3684	3.6983	40.3786	39.1044	41.6943	0	0	1	0	1	-0.22864							-0.22864
	27		k=An vs k=No, extraction_date=4	-0.2712	<.0001	3.9284	50.8256	47.1998	54.7299	3.6572	38.7527	37.5298	40.0154	0	0	1	0	1	-0.237536							-0.237536
	27		k=An vs k=Vt, extraction_date=4	-0.2962	0.0395	3.9284	50.8256	47.1998	54.7299	3.6322	37.7959	32.668	43.7287	0	0	1	0	1	-0.256361								-0.256361
	27		k=An vs k=Dy, extraction_date=5	0.5224	<.0001	3.9646	52.6992	48.9417	56.7452	4.4869	88.8456	74.0034	106.665	0	0	1	0	1	0.685901																									0.685901
	27		k=An vs k=No, extraction_date=5	-0.2731	<.0001	3.9646	52.6992	48.9417	56.7452	3.6915	40.105	38.8417	41.4094	0	0	1	0	1	-0.238983							-0.238983
	27		k=An vs k=Vt, extraction_date=5	-0.3091	0.0221	3.9646	52.6992	48.9417	56.7452	3.6555	38.6869	33.4381	44.7595	0	0	1	0	1	-0.265893								-0.265893
	27		k=An vs k=Dy, extraction_date=6	0.5239	<.0001	4.0502	57.4089	53.3209	61.8104	4.5742	96.9504	80.7004	116.473	1	0	1	0	1	0.688769																									0.688769
	27		k=An vs k=No, extraction_date=6	-0.3092	<.0001	4.0502	57.4089	53.3209	61.8104	3.741	42.1401	40.8135	43.5098	1	0	1	0	1	-0.265966							-0.265966
	27		k=An vs k=Vt, extraction_date=6	-0.3527	0.0025	4.0502	57.4089	53.3209	61.8104	3.6975	40.3463	34.8724	46.6795	1	0	1	0	1	-0.297212								-0.297212
	27		k=Dy vs k=Ev, extraction_date=5	-0.5341	<.0001	4.4869	88.8456	74.0034	106.665	3.9529	52.0862	49.5226	54.7825	0	0	1	0	1	-0.413745															-0.413745
	27		k=Dy vs k=No, extraction_date=5	-0.7955	<.0001	4.4869	88.8456	74.0034	106.665	3.6915	40.105	38.8417	41.4094	0	0	1	0	1	-0.548599																-0.548599
	27		k=Dy vs k=Vt, extraction_date=5	-0.8314	<.0001	4.4869	88.8456	74.0034	106.665	3.6555	38.6869	33.4381	44.7595	0	0	1	0	1	-0.564561																	-0.564561
	27		k=Dy vs k=Ev, extraction_date=6	-0.5527	<.0001	4.5742	96.9504	80.7004	116.473	4.0215	55.7847	53.0391	58.6724	1	0	1	0	1	-0.424606															-0.424606
	27		k=Dy vs k=No, extraction_date=6	-0.8332	<.0001	4.5742	96.9504	80.7004	116.473	3.741	42.1401	40.8135	43.5098	1	0	1	0	1	-0.565344																-0.565344
	27		k=Dy vs k=Vt, extraction_date=6	-0.8767	<.0001	4.5742	96.9504	80.7004	116.473	3.6975	40.3463	34.8724	46.6795	1	0	1	0	1	-0.583846																	-0.583846
	27		k=Ev vs k=No, extraction_date=2	-0.2423	<.0001	3.9366	51.2441	48.7115	53.9084	3.6943	40.2174	38.9475	41.5287	0	0	1	0	1	-0.215179																					-0.215179
	27		k=Ev vs k=Vt, extraction_date=2	-0.2771	0.0444	3.9366	51.2441	48.7115	53.9084	3.6595	38.8419	33.5721	44.9389	0	0	1	0	1	-0.242021																						-0.242021
	27		k=Ev vs k=No, extraction_date=3	-0.2303	<.0001	3.9287	50.8408	48.3272	53.4852	3.6983	40.3786	39.1044	41.6943	0	0	1	0	1	-0.205784																					-0.205784
	27		k=Ev vs k=No, extraction_date=4	-0.2281	<.0001	3.8853	48.6815	46.2738	51.2146	3.6572	38.7527	37.5298	40.0154	0	0	1	0	1	-0.203955																					-0.203955
	27		k=Ev vs k=No, extraction_date=5	-0.2614	<.0001	3.9529	52.0862	49.5226	54.7825	3.6915	40.105	38.8417	41.4094	0	0	1	0	1	-0.230027																					-0.230027
	27		k=Ev vs k=Vt, extraction_date=5	-0.2974	0.0166	3.9529	52.0862	49.5226	54.7825	3.6555	38.6869	33.4381	44.7595	0	0	1	0	1	-0.257253																						-0.257253
	27		k=Ev vs k=No, extraction_date=6	-0.2805	<.0001	4.0215	55.7847	53.0391	58.6724	3.741	42.1401	40.8135	43.5098	1	0	1	0	1	-0.244594																					-0.244594
	27		k=Ev vs k=Vt, extraction_date=6	-0.324	0.0041	4.0215	55.7847	53.0391	58.6724	3.6975	40.3463	34.8724	46.6795	1	0	1	0	1	-0.27675																						-0.27675
	27		k=An, extraction_date=2 vs extraction_date=4	-0.04626	<.0001	3.9746	53.2288	49.4316	57.3177	3.9284	50.8256	47.1998	54.7299	0	1	1	1	2	-0.045149		-0.045149
	27		k=An, extraction_date=2 vs extraction_date=6	0.07558	<.0001	3.9746	53.2288	49.4316	57.3177	4.0502	57.4089	53.3209	61.8104	1	1	1	1	2	0.0785311	0.0785311
	27		k=An, extraction_date=3 vs extraction_date=6	0.09231	<.0001	3.9579	52.3473	48.613	56.3684	4.0502	57.4089	53.3209	61.8104	1	0	1	1	1	0.0966938
	27		k=An, extraction_date=4 vs extraction_date=5	0.03621	0.0032	3.9284	50.8256	47.1998	54.7299	3.9646	52.6992	48.9417	56.7452	0	0	1	1	1	0.0368632
	27		k=An, extraction_date=4 vs extraction_date=6	0.1218	<.0001	3.9284	50.8256	47.1998	54.7299	4.0502	57.4089	53.3209	61.8104	1	0	1	1	1	0.129528
	27		k=An, extraction_date=5 vs extraction_date=6	0.08563	<.0001	3.9646	52.6992	48.9417	56.7452	4.0502	57.4089	53.3209	61.8104	1	0	1	1	1	0.0893705
	27		k=Dy, extraction_date=5 vs extraction_date=6	0.08722	0.0046	4.4869	88.8456	74.0034	106.665	4.5742	96.9504	80.7004	116.473	1	0	1	1	1	0.091224
	27		k=Ev, extraction_date=2 vs extraction_date=4	-0.05132	<.0001	3.9366	51.2441	48.7115	53.9084	3.8853	48.6815	46.2738	51.2146	0	1	1	1	2	-0.0500064		-0.0500064
	27		k=Ev, extraction_date=2 vs extraction_date=6	0.08487	<.0001	3.9366	51.2441	48.7115	53.9084	4.0215	55.7847	53.0391	58.6724	1	1	1	1	2	0.0886082	0.0886082
	27		k=Ev, extraction_date=3 vs extraction_date=4	-0.04339	<.0001	3.9287	50.8408	48.3272	53.4852	3.8853	48.6815	46.2738	51.2146	0	0	1	1	1	-0.0424717
	27		k=Ev, extraction_date=3 vs extraction_date=5	0.02421	0.0085	3.9287	50.8408	48.3272	53.4852	3.9529	52.0862	49.5226	54.7825	0	0	1	1	1	0.0244952
	27		k=Ev, extraction_date=3 vs extraction_date=6	0.09281	<.0001	3.9287	50.8408	48.3272	53.4852	4.0215	55.7847	53.0391	58.6724	1	0	1	1	1	0.0972423
	27		k=Ev, extraction_date=4 vs extraction_date=5	0.0676	<.0001	3.8853	48.6815	46.2738	51.2146	3.9529	52.0862	49.5226	54.7825	0	0	1	1	1	0.0699372
	27		k=Ev, extraction_date=4 vs extraction_date=6	0.1362	<.0001	3.8853	48.6815	46.2738	51.2146	4.0215	55.7847	53.0391	58.6724	1	0	1	1	1	0.145911
	27		k=Ev, extraction_date=5 vs extraction_date=6	0.06859	<.0001	3.9529	52.0862	49.5226	54.7825	4.0215	55.7847	53.0391	58.6724	1	0	1	1	1	0.0710077
	27		k=No, extraction_date=2 vs extraction_date=4	-0.03716	<.0001	3.6943	40.2174	38.9475	41.5287	3.6572	38.7527	37.5298	40.0154	0	1	1	1	2	-0.0364202		-0.0364202
	27		k=No, extraction_date=2 vs extraction_date=6	0.04668	<.0001	3.6943	40.2174	38.9475	41.5287	3.741	42.1401	40.8135	43.5098	1	1	1	1	2	0.0478076	0.0478076
	27		k=No, extraction_date=3 vs extraction_date=4	-0.04119	<.0001	3.6983	40.3786	39.1044	41.6943	3.6572	38.7527	37.5298	40.0154	0	0	1	1	1	-0.0402668
	27		k=No, extraction_date=3 vs extraction_date=6	0.04265	<.0001	3.6983	40.3786	39.1044	41.6943	3.741	42.1401	40.8135	43.5098	1	0	1	1	1	0.0436248
	27		k=No, extraction_date=4 vs extraction_date=5	0.03432	<.0001	3.6572	38.7527	37.5298	40.0154	3.6915	40.105	38.8417	41.4094	0	0	1	1	1	0.034895
	27		k=No, extraction_date=4 vs extraction_date=6	0.08384	<.0001	3.6572	38.7527	37.5298	40.0154	3.741	42.1401	40.8135	43.5098	1	0	1	1	1	0.0874114
	27		k=No, extraction_date=5 vs extraction_date=6	0.04952	<.0001	3.6915	40.105	38.8417	41.4094	3.741	42.1401	40.8135	43.5098	1	0	1	1	1	0.0507456
	27		k=Vt, extraction_date=4 vs extraction_date=6	0.06528	0.0037	3.6322	37.7959	32.668	43.7287	3.6975	40.3463	34.8724	46.6795	1	0	1	1	1	0.0674792
	16		Comparison	Effect size	P-value	LSmean 1	BT 1	95% CI		LSmean 2	BT 2	95% CI		lastExtr6	firstExtr2	1of2extract	2of2extract	Sec2First1	Percchange	PercchangePOS	PerccghangeNEG	An > Dv	An > Dy	An > Em	An > Ev	An > No	An > Vt	Dv > Dy	Dv > Em	Dv > Ev	Dv > No	Dv > Vt	Dy > Em	Dy > Ev	Dy > No	Dy > Vt	Em > Ev	Em > No	Em > Vt	Ev > No	Ev > Vt	No > Vt	An < Dv	An < Dy	An < Em	An < Ev	An < No	An < Vt	Dv < Dy
	16	X-ray hip dysplasia	k=An vs k=Dy, extraction_date=2	-0.2829	0.0005	5.3126	202.877	193.836	212.34	5.0297	152.887	136.804	170.861	0	0	1	0	1	-0.246405				-0.246405
	16		k=An vs k=Em, extraction_date=2	-0.2678	<.0001	5.3126	202.877	193.836	212.34	5.0449	155.229	141.271	170.565	0	0	1	0	1	-0.234863					-0.234863
	16		k=An vs k=No, extraction_date=2	-0.1588	<.0001	5.3126	202.877	193.836	212.34	5.1538	173.088	167.807	178.536	0	0	1	0	1	-0.146833							-0.146833
	16		k=An vs k=Dy, extraction_date=3	-0.3158	<.0001	5.283	196.96	188.193	206.135	4.9671	143.61	128.311	160.732	0	0	1	0	1	-0.270868				-0.270868
	16		k=An vs k=Em, extraction_date=3	-0.3032	<.0001	5.283	196.96	188.193	206.135	4.9798	145.445	132.368	159.815	0	0	1	0	1	-0.261549					-0.261549
	16		k=An vs k=No, extraction_date=3	-0.1265	<.0001	5.283	196.96	188.193	206.135	5.1565	173.556	168.316	178.959	0	0	1	0	1	-0.118826							-0.118826
	16		k=An vs k=Dy, extraction_date=4	-0.3499	<.0001	5.2742	195.234	186.515	204.361	4.9243	137.593	122.935	153.998	0	0	1	0	1	-0.295241				-0.295241
	16		k=An vs k=Em, extraction_date=4	-0.3365	<.0001	5.2742	195.234	186.515	204.361	4.9377	139.449	126.911	153.226	0	0	1	0	1	-0.285734					-0.285734
	16		k=An vs k=No, extraction_date=4	-0.1528	<.0001	5.2742	195.234	186.515	204.361	5.1214	167.57	162.514	172.783	0	0	1	0	1	-0.141699							-0.141699
	16		k=An vs k=No, extraction_date=5	-0.1551	<.0001	5.329	206.232	197.021	215.872	5.1739	176.602	171.274	182.096	0	0	1	0	1	-0.14367							-0.14367
	16		k=An vs k=Dv, extraction_date=6	-0.1175	0.0436	5.4031	222.094	212.204	232.444	5.2856	197.473	187.934	207.495	1	0	1	0	1	-0.110859			-0.110859
	16		k=An vs k=No, extraction_date=6	-0.215	<.0001	5.4031	222.094	212.204	232.444	5.1881	179.128	173.727	184.697	1	0	1	0	1	-0.193459							-0.193459
	16		k=Dv vs k=Dy, extraction_date=3	-0.3018	0.0002	5.2689	194.202	184.887	203.987	4.9671	143.61	128.311	160.732	0	0	1	0	1	-0.260514									-0.260514
	16		k=Dv vs k=Em, extraction_date=3	-0.2891	<.0001	5.2689	194.202	184.887	203.987	4.9798	145.445	132.368	159.815	0	0	1	0	1	-0.251063										-0.251063
	16		k=Dv vs k=No, extraction_date=3	-0.1124	0.0008	5.2689	194.202	184.887	203.987	5.1565	173.556	168.316	178.959	0	0	1	0	1	-0.106313												-0.106313
	16		k=Dv vs k=Dy, extraction_date=4	-0.2996	0.0003	5.2239	185.657	176.744	195.019	4.9243	137.593	122.935	153.998	0	0	1	0	1	-0.258885									-0.258885
	16		k=Dv vs k=Em, extraction_date=4	-0.2862	<.0001	5.2239	185.657	176.744	195.019	4.9377	139.449	126.911	153.226	0	0	1	0	1	-0.248888										-0.248888
	16		k=Dv vs k=No, extraction_date=4	-0.1025	0.0052	5.2239	185.657	176.744	195.019	5.1214	167.57	162.514	172.783	0	0	1	0	1	-0.0974219												-0.0974219
	16		k=Dv vs k=Dy, extraction_date=6	0.2345	0.0349	5.2856	197.473	187.934	207.495	5.5201	249.66	222.776	279.789	1	0	1	0	1	0.264276																														0.264276
	16		k=Dv vs k=Ev, extraction_date=6	0.1175	0.0099	5.2856	197.473	187.934	207.495	5.4031	222.094	213.833	230.674	1	0	1	0	1	0.124682
	16		k=Dv vs k=No, extraction_date=6	-0.09749	0.0141	5.2856	197.473	187.934	207.495	5.1881	179.128	173.727	184.697	1	0	1	0	1	-0.0928977												-0.0928977
	16		k=Dy vs k=Ev, extraction_date=2	0.2247	0.0326	5.0297	152.887	136.804	170.861	5.2544	191.407	184.29	198.798	0	0	1	0	1	0.251947
	16		k=Dy vs k=Ev, extraction_date=3	0.2851	0.0005	4.9671	143.61	128.311	160.732	5.2523	191.005	183.897	198.388	0	0	1	0	1	0.330028
	16		k=Dy vs k=Vt, extraction_date=3	0.3344	0.004	4.9671	143.61	128.311	160.732	5.3015	200.638	180.378	223.173	0	0	1	0	1	0.397102
	16		k=Dy vs k=Ev, extraction_date=4	0.2847	0.0005	4.9243	137.593	122.935	153.998	5.209	182.911	176.097	189.989	0	0	1	0	1	0.329363
	16		k=Dy vs k=Vt, extraction_date=4	0.3339	0.0045	4.9243	137.593	122.935	153.998	5.2582	192.135	172.568	213.921	0	0	1	0	1	0.396403
	16		k=Dy vs k=No, extraction_date=6	-0.332	<.0001	5.5201	249.66	222.776	279.789	5.1881	179.128	173.727	184.697	1	0	1	0	1	-0.282513																-0.282513
	16		k=Em vs k=Ev, extraction_date=2	0.2095	0.0073	5.0449	155.229	141.271	170.565	5.2544	191.407	184.29	198.798	0	0	1	0	1	0.233061
	16		k=Em vs k=Ev, extraction_date=3	0.2724	<.0001	4.9798	145.445	132.368	159.815	5.2523	191.005	183.897	198.388	0	0	1	0	1	0.313243
	16		k=Em vs k=Vt, extraction_date=3	0.3217	0.0019	4.9798	145.445	132.368	159.815	5.3015	200.638	180.378	223.173	0	0	1	0	1	0.379471
	16		k=Em vs k=Ev, extraction_date=4	0.2713	<.0001	4.9377	139.449	126.911	153.226	5.209	182.911	176.097	189.989	0	0	1	0	1	0.311669
	16		k=Em vs k=No, extraction_date=4	0.1837	0.0331	4.9377	139.449	126.911	153.226	5.1214	167.57	162.514	172.783	0	0	1	0	1	0.201655
	16		k=Em vs k=Vt, extraction_date=4	0.3205	0.0022	4.9377	139.449	126.911	153.226	5.2582	192.135	172.568	213.921	0	0	1	0	1	0.377817
	16		k=Em vs k=No, extraction_date=5	-0.1956	0.0123	5.3694	214.734	195.426	235.949	5.1739	176.602	171.274	182.096	0	0	1	0	1	-0.177577																			-0.177577
	16		k=Ev vs k=No, extraction_date=2	-0.1006	0.0013	5.2544	191.407	184.29	198.798	5.1538	173.088	167.807	178.536	0	0	1	0	1	-0.0957053																					-0.0957053
	16		k=Ev vs k=No, extraction_date=3	-0.09575	0.0033	5.2523	191.005	183.897	198.388	5.1565	173.556	168.316	178.959	0	0	1	0	1	-0.0913543																					-0.0913543
	16		k=Ev vs k=No, extraction_date=4	-0.08752	0.0166	5.209	182.911	176.097	189.989	5.1214	167.57	162.514	172.783	0	0	1	0	1	-0.0838727																					-0.0838727
	16		k=Ev vs k=No, extraction_date=5	-0.1554	<.0001	5.3293	206.294	198.612	214.272	5.1739	176.602	171.274	182.096	0	0	1	0	1	-0.143927																					-0.143927
	16		k=Ev vs k=No, extraction_date=6	-0.215	<.0001	5.4031	222.094	213.833	230.674	5.1881	179.128	173.727	184.697	1	0	1	0	1	-0.193459																					-0.193459
	16		k=An, extraction_date=2 vs extraction_date=4	-0.03843	0.0302	5.3126	202.877	193.836	212.34	5.2742	195.234	186.515	204.361	0	1	1	1	2	-0.0376721		-0.0376721
	16		k=An, extraction_date=2 vs extraction_date=6	0.09044	<.0001	5.3126	202.877	193.836	212.34	5.4031	222.094	212.204	232.444	1	1	1	1	2	0.0947215	0.0947215
	16		k=An, extraction_date=3 vs extraction_date=5	0.046	0.001	5.283	196.96	188.193	206.135	5.329	206.232	197.021	215.872	0	0	1	1	1	0.0470744
	16		k=An, extraction_date=3 vs extraction_date=6	0.1201	<.0001	5.283	196.96	188.193	206.135	5.4031	222.094	212.204	232.444	1	0	1	1	1	0.12761
	16		k=An, extraction_date=4 vs extraction_date=5	0.05477	<.0001	5.2742	195.234	186.515	204.361	5.329	206.232	197.021	215.872	0	0	1	1	1	0.0563293
	16		k=An, extraction_date=4 vs extraction_date=6	0.1289	<.0001	5.2742	195.234	186.515	204.361	5.4031	222.094	212.204	232.444	1	0	1	1	1	0.137576
	16		k=An, extraction_date=5 vs extraction_date=6	0.07409	<.0001	5.329	206.232	197.021	215.872	5.4031	222.094	212.204	232.444	1	0	1	1	1	0.0769145
	16		k=Dv, extraction_date=2 vs extraction_date=6	0.04927	<.0001	5.2363	187.973	178.978	197.421	5.2856	197.473	187.934	207.495	1	1	1	1	2	0.0505355	0.0505355
	16		k=Dv, extraction_date=3 vs extraction_date=4	-0.04501	0.0002	5.2689	194.202	184.887	203.987	5.2239	185.657	176.744	195.019	0	0	1	1	1	-0.0440025
	16		k=Dv, extraction_date=4 vs extraction_date=6	0.06164	<.0001	5.2239	185.657	176.744	195.019	5.2856	197.473	187.934	207.495	1	0	1	1	1	0.0636432
	16		k=Dv, extraction_date=5 vs extraction_date=6	0.03847	0.0193	5.2471	190.014	180.836	199.659	5.2856	197.473	187.934	207.495	1	0	1	1	1	0.0392507
	16		k=Dy, extraction_date=2 vs extraction_date=4	-0.1054	0.0227	5.0297	152.887	136.804	170.861	4.9243	137.593	122.935	153.998	0	1	1	1	2	-0.100036		-0.100036
	16		k=Dy, extraction_date=2 vs extraction_date=5	0.3153	<.0001	5.0297	152.887	136.804	170.861	5.345	209.558	187.234	234.544	0	1	1	1	2	0.37067	0.37067
	16		k=Dy, extraction_date=2 vs extraction_date=6	0.4904	<.0001	5.0297	152.887	136.804	170.861	5.5201	249.66	222.776	279.789	1	1	1	1	2	0.632969	0.632969
	16		k=Dy, extraction_date=3 vs extraction_date=5	0.3778	<.0001	4.9671	143.61	128.311	160.732	5.345	209.558	187.234	234.544	0	0	1	1	1	0.459217
	16		k=Dy, extraction_date=3 vs extraction_date=6	0.553	<.0001	4.9671	143.61	128.311	160.732	5.5201	249.66	222.776	279.789	1	0	1	1	1	0.738461
	16		k=Dy, extraction_date=4 vs extraction_date=5	0.4207	<.0001	4.9243	137.593	122.935	153.998	5.345	209.558	187.234	234.544	0	0	1	1	1	0.523027
	16		k=Dy, extraction_date=4 vs extraction_date=6	0.5958	<.0001	4.9243	137.593	122.935	153.998	5.5201	249.66	222.776	279.789	1	0	1	1	1	0.814482
	16		k=Dy, extraction_date=5 vs extraction_date=6	0.1751	<.0001	5.345	209.558	187.234	234.544	5.5201	249.66	222.776	279.789	1	0	1	1	1	0.191365
	16		k=Em, extraction_date=2 vs extraction_date=4	-0.1072	<.0001	5.0449	155.229	141.271	170.565	4.9377	139.449	126.911	153.226	0	1	1	1	2	-0.101654		-0.101654
	16		k=Em, extraction_date=2 vs extraction_date=5	0.3246	<.0001	5.0449	155.229	141.271	170.565	5.3694	214.734	195.426	235.949	0	1	1	1	2	0.383339	0.383339
	16		k=Em, extraction_date=2 vs extraction_date=6	0.2905	<.0001	5.0449	155.229	141.271	170.565	5.3353	207.535	188.875	228.039	1	1	1	1	2	0.336962	0.336962
	16		k=Em, extraction_date=3 vs extraction_date=5	0.3896	<.0001	4.9798	145.445	132.368	159.815	5.3694	214.734	195.426	235.949	0	0	1	1	1	0.47639
	16		k=Em, extraction_date=3 vs extraction_date=6	0.3555	<.0001	4.9798	145.445	132.368	159.815	5.3353	207.535	188.875	228.039	1	0	1	1	1	0.426894
	16		k=Em, extraction_date=4 vs extraction_date=5	0.4318	<.0001	4.9377	139.449	126.911	153.226	5.3694	214.734	195.426	235.949	0	0	1	1	1	0.539873
	16		k=Em, extraction_date=4 vs extraction_date=6	0.3977	<.0001	4.9377	139.449	126.911	153.226	5.3353	207.535	188.875	228.039	1	0	1	1	1	0.488249
	16		k=Ev, extraction_date=2 vs extraction_date=4	-0.04544	<.0001	5.2544	191.407	184.29	198.798	5.209	182.911	176.097	189.989	0	1	1	1	2	-0.0443848		-0.0443848
	16		k=Ev, extraction_date=2 vs extraction_date=5	0.07488	<.0001	5.2544	191.407	184.29	198.798	5.3293	206.294	198.612	214.272	0	1	1	1	2	0.0777764	0.0777764
	16		k=Ev, extraction_date=2 vs extraction_date=6	0.1487	<.0001	5.2544	191.407	184.29	198.798	5.4031	222.094	213.833	230.674	1	1	1	1	2	0.160325	0.160325
	16		k=Ev, extraction_date=3 vs extraction_date=4	-0.04329	<.0001	5.2523	191.005	183.897	198.388	5.209	182.911	176.097	189.989	0	0	1	1	1	-0.0423759
	16		k=Ev, extraction_date=3 vs extraction_date=5	0.07704	<.0001	5.2523	191.005	183.897	198.388	5.3293	206.294	198.612	214.272	0	0	1	1	1	0.0800421
	16		k=Ev, extraction_date=3 vs extraction_date=6	0.1508	<.0001	5.2523	191.005	183.897	198.388	5.4031	222.094	213.833	230.674	1	0	1	1	1	0.162764
	16		k=Ev, extraction_date=4 vs extraction_date=5	0.1203	<.0001	5.209	182.911	176.097	189.989	5.3293	206.294	198.612	214.272	0	0	1	1	1	0.127835
	16		k=Ev, extraction_date=4 vs extraction_date=6	0.1941	<.0001	5.209	182.911	176.097	189.989	5.4031	222.094	213.833	230.674	1	0	1	1	1	0.214218
	16		k=Ev, extraction_date=5 vs extraction_date=6	0.07379	<.0001	5.3293	206.294	198.612	214.272	5.4031	222.094	213.833	230.674	1	0	1	1	1	0.0765915
	16		k=No, extraction_date=2 vs extraction_date=4	-0.0324	<.0001	5.1538	173.088	167.807	178.536	5.1214	167.57	162.514	172.783	0	1	1	1	2	-0.0318807		-0.0318807
	16		k=No, extraction_date=2 vs extraction_date=6	0.03426	<.0001	5.1538	173.088	167.807	178.536	5.1881	179.128	173.727	184.697	1	1	1	1	2	0.034895	0.034895
	16		k=No, extraction_date=3 vs extraction_date=4	-0.03507	<.0001	5.1565	173.556	168.316	178.959	5.1214	167.57	162.514	172.783	0	0	1	1	1	-0.0344911
	16		k=No, extraction_date=3 vs extraction_date=6	0.03159	<.0001	5.1565	173.556	168.316	178.959	5.1881	179.128	173.727	184.697	1	0	1	1	1	0.0321046
	16		k=No, extraction_date=4 vs extraction_date=5	0.05244	<.0001	5.1214	167.57	162.514	172.783	5.1739	176.602	171.274	182.096	0	0	1	1	1	0.0539026
	16		k=No, extraction_date=4 vs extraction_date=6	0.06666	<.0001	5.1214	167.57	162.514	172.783	5.1881	179.128	173.727	184.697	1	0	1	1	1	0.0689747
														395	151	892	498	151	491	111	40	26	17	17	7	76	18	8	7	2	28	5	2	4	10	8	0	2	0	66	20	0	0	4	0	0	0	0	4
																					183						35															LARGER
																				151	393	Anicura more expensive	more expensive				161							161	0.975758
																				0.735099		Anicura less	less expensive				4							4	165
																						DV	more expensive				45	0						45	0.436893
																						DV	less expensive				32	26						58	103
																						DY	more expensive				24	8						32	0.463768
																						DY	less expensive				12	25						37	69
																						Em	more expensive				2	1						3	0.0588235
																						Em	less expensive				22	26						48	51
																						Ev	more expensive				86	52						138	0.913907
																						Ev	less expensive				0	13						13	151
																						No	more expensive				0	2						2	0.0108108
																						No	less expensive				1	182						183	185
																						Vt	more expensive				8							8	0.135593
																						Vt	less expensive				51							51	59
[truncated: 15 more columns]
